# Supplementary material for: Regulation of cellular plasticity in Drosophila imaginal disc cells by the Polycomb group, trithorax group and lama genes
Source: Oxford University Press journal article supplement (doi:10.1242/dev.01927), 2005-08-02
Supplement: dev01927-sup-table10.pdf [file dev01927-sup-table10.pdf]

**Table S10. Computational search for regulatory elements****A. Supervised search for vgBE-like elements**

| CG# from TD list | Synonym        | # Clusters | # Different Motifs | Function                                                                                                                                                                                        |
|------------------|----------------|------------|--------------------|-------------------------------------------------------------------------------------------------------------------------------------------------------------------------------------------------|
| CG10121          | /              | 1          | 3                  | /                                                                                                                                                                                               |
| CG10336          | CG10336        | 1          | 2                  | /                                                                                                                                                                                               |
| CG11822          | nAcRbeta-21C   | 1          | 2                  | nicotinic acetylcholine-activated cation-selective channel activity; ; GO:0004889; ; GO:0004889; ; GO:0004889                                                                                   |
| CG1210           | Pk61C          | 1          | 3                  | protein serine/threonine kinase activity; ; GO:0004674; receptor signaling protein serine/threonine kinase activity; ; GO:0004702 ; EC:2.7.1.-; ; GO:0004674; protein kinase activity; ; GO:000 |
| CG12534          | similar to ALR | 1          | 3                  | flavin-linked sulfhydryl oxidase activity; ; GO:0016971; ; GO:0016971                                                                                                                           |
| CG12840          | Tsp42E1        | 1          | 2                  | receptor signaling protein activity; ; GO:0005057; ; GO:0005057                                                                                                                                 |
| CG13780          | Pvf2           | 1          | 1                  | vascular endothelial growth factor receptor binding; ; GO:0005172; ; GO:0005172                                                                                                                 |
| CG14059          | CG14059        | 1          | 2                  | /                                                                                                                                                                                               |
| CG14879          | CG14879        | 1          | 2                  | /                                                                                                                                                                                               |
| CG15561          | CG15561        | 1          | 2                  | /                                                                                                                                                                                               |
| CG17108          | CG17108        | 1          | 3                  | acetyl-CoA carboxylase activity; ; GO:0003989 ; EC:6.4.1.2; ; GO:0003989 ; EC:6.4.1.2                                                                                                           |
| CG17914          | yellow-b       | 1          | 2                  | /                                                                                                                                                                                               |
| CG18290          | Act87E         | 1          | 1                  | structural constituent of cytoskeleton; GO:0005200; ; GO:0005200                                                                                                                                |
| CG1874           | CG1874         | 1          | 1                  | /                                                                                                                                                                                               |
| CG1994           | l(1)G0020      | 1          | 2                  | N-acetyltransferase activity; GO:0008080 ; EC:2.3.1.-; ; GO:0008080 ; EC:2.3.1.-                                                                                                                |
| CG2028           | CkIalpha       | 1          | 2                  | casein kinase I activity; ; GO:0004681 ; EC:2.7.1.-; ; GO:0004681 ; EC:2.7.1.-; ; GO:0004681 ; EC:2.7.1.-; receptor signaling protein serine/threonine kinase activity; ; GO:0004702 ; EC:2.7   |
| CG3198           | CG3198         | 1          | 2                  | nuclear mRNA splicing, via spliceosome; ; GO:0000398                                                                                                                                            |
| CG3200           | Reg-2          | 1          | 3                  | wide-spectrum protease inhibitor activity; ; GO:0017114; ; GO:0017114                                                                                                                           |
| CG3568           | CG3568         | 1          | 3                  | /                                                                                                                                                                                               |
| CG3830           | vg             | 1          | 2                  | wing margin morphogenesis; ; GO:0008587; wing morphogenesis; ; GO:0007476                                                                                                                       |
| CG4766           | CG4766         | 1          | 2                  | /                                                                                                                                                                                               |
| CG5355           | CG5355         | 1          | 2                  | prolyl oli; GOpeptidase activity; ; GO:0004287 ; EC:3.4.21.26; ; GO:0004287 ; EC:3.4.21.26                                                                                                      |
| CG5518           | sda            | 1          | 3                  | membrane alanyl aminopeptidase activity; GO:0004179 ; EC:3.4.11.2; ; GO:0004179 ; EC:3.4.11.2                                                                                                   |
| CG5836           | SF1            | 1          | 1                  | pre-mRNA splicing factor activity; GO:0008248; ; GO:0008248; transcription cofactor activity; GO:0003712; ; GO:0008248; ; GO:0003712                                                            |
| CG5840           | CG5840         | 1          | 1                  | pyrroline-5-carboxylate reductase activity; GO:0004735 ; EC:1.5.1.2; ; GO:0004735 ; EC:1.5.1.2                                                                                                  |
| CG5913           | CG5913         | 1          | 2                  | /                                                                                                                                                                                               |
| CG6044           | CG6044         | 1          | 3                  | /                                                                                                                                                                                               |
| CG6743           | Nup170         | 1          | 3                  | transporter activity; ; GO:0005215; ; GO:0005215                                                                                                                                                |
| CG7539           | Edg91          | 1          | 1                  | structural constituent of pupal cuticle (sensu Insecta); GO:0008011; ; GO:0008011                                                                                                               |
| CG7583           | CtBP           | 1          | 2                  | protein C-terminus binding; GO:0008022; ; GO:0008022; transcription corepressor activity; GO:0003714; ; GO:0003714; ; GO:0003714                                                                |
| CG7804           | CG7804         | 1          | 1                  | RNA binding; ; GO:0003723; ; GO:0003723; transcription regulator activity; ; GO:0030528; ; GO:0030528                                                                                           |

|                |                |          |              |                                                                                                                                                                        |
|----------------|----------------|----------|--------------|------------------------------------------------------------------------------------------------------------------------------------------------------------------------|
| <b>CG8171</b>  | <b>dup</b>     | <b>1</b> | <b>3</b>     | DNA binding; Mutants affect: S-phase, embryo, imaginal disc                                                                                                            |
| <b>CG8394</b>  | <b>CG8394</b>  | <b>1</b> | <b>2</b>     | gamma-aminobutyric acid transporter activity; ; GO:0005331; ; GO:0005331                                                                                               |
| <b>CG8545</b>  | <b>CG8545</b>  | <b>1</b> | <b>2</b>     | nucleic acid binding; ; GO:0003676; ; GO:0003676                                                                                                                       |
| <b>CG8805</b>  | <b>wun2</b>    | <b>1</b> | <b>3</b>     | phosphatidate phosphatase activity; ; GO:0008195; EC:3.1.3.4; ; GO:0008195; EC:3.1.3.4; ; GO:0008195; EC:3.1.3.4; ; GO:0008195; EC:3.1.3.4                             |
| <b>CG9023</b>  | <b>Drip</b>    | <b>1</b> | <b>2</b>     | water transporter activity; ; GO:0005372; ; GO:0005372; carrier activity; ; GO:0005386; ; GO:0005386; water channel activity; ; GO:0015250; ; GO:0005372; ; GO:0015250 |
| <b>CG11450</b> | <b>net</b>     | <b>2</b> | <b>1,3</b>   | RNA polymerase II transcription factor activity; interacts with rho and EGFR, wing vein patterning                                                                     |
| <b>CG15279</b> | <b>CG15279</b> | <b>2</b> | <b>3,2</b>   | cation:amino acid symporter activity; ; GO:0005416; neurotransmitter:sodium symporter activity; ; GO:0005328; ; GO:0005416; ; GO:0005328                               |
| <b>CG17337</b> | <b>CG17337</b> | <b>2</b> | <b>1,2</b>   | /                                                                                                                                                                      |
| <b>CG17843</b> | <b>CG17843</b> | <b>2</b> | <b>3,1</b>   | flavin-linked sulfhydryl oxidase activity; GO:0016971; glucosidase activity; GO:0015926; EC:3.2.1.-; ; GO:0015926; EC:3.2.1.-; ; GO:0016971                            |
| <b>CG2863</b>  | <b>Nle</b>     | <b>2</b> | <b>1,3</b>   | Notch signaling pathway; ; GO:0007219                                                                                                                                  |
| <b>CG3036</b>  | <b>CG3036</b>  | <b>2</b> | <b>1,1</b>   | sodium:phosphate symporter activity; ; GO:0005436; ; GO:0005436                                                                                                        |
| <b>CG4591</b>  | <b>Tsp86D</b>  | <b>2</b> | <b>3,2</b>   | receptor binding; GO:0005102; ; GO:0005102                                                                                                                             |
| <b>CG5114</b>  | <b>CG5114</b>  | <b>3</b> | <b>3,3,1</b> | /                                                                                                                                                                      |
| <b>CG6751</b>  | <b>CG6751</b>  | <b>2</b> | <b>2,1</b>   | general RNA polymerase II transcription factor activity; ; GO:0016251; ; GO:0016251                                                                                    |

## B. Unsupervised search for putative regulatory elements

| GENE    | Count of TATCGATA | Ratio in TD | TATCGATA positions upstream |     | Function                                                                                                                                                                                           |
|---------|-------------------|-------------|-----------------------------|-----|----------------------------------------------------------------------------------------------------------------------------------------------------------------------------------------------------|
| CG10223 | 1                 | -1.334      | -37                         |     | Top2; DNA binding; ; GO:0003677; RNA binding; ; GO:0003723; ; GO:0003677; ; GO:0003723; ATPase activity; ; GO:0003723; topoisomerase (ATP-hydrolyzing) activity; ; GO:0003918; EC:5.99.1.3; ; GO:0 |
| CG1512  | 1                 | -1.103      | -20                         |     | cul-2; proteolysis and peptidolysis; ; GO:0006508; regulation of cell cycle; ; GO:0000074                                                                                                          |
| CG15218 | 1                 | -1.164      | -486                        |     | CycK; transcription regulator activity; ; GO:0030528; kinase activator activity; ; GO:0019209; cyclin-dependent protein kinase activity; ; GO:0016538; EC:2.7.1.-; ; GO:0030528; ; GO:0019         |
| CG15484 | 1                 | -1.5095     | -125                        |     | CG15484                                                                                                                                                                                            |
| CG10642 | 1                 | -1.122      | -171                        |     | Klp64D; structural constituent of cytoskeleton; ; GO:0005200; microtubule motor activity; ; GO:0003777; ; GO:0003777; ; GO:0005200; ; GO:0003777                                                   |
| CG11255 | 1                 | -1.057      | -574                        |     | /                                                                                                                                                                                                  |
| CG5553  | 1                 | -1.04345    | -45                         |     | DNAprim; nucleic acid binding; GO:0003676; DNA primase activity; GO:0003896; EC:2.7.7.-; ; GO:0003896; EC:2.7.7.-; ; GO:0003896; EC:2.7.7.-; ; GO:0003896; EC:2.7.7.-; ; GO:0003                   |
| CG5837  | 2                 | -1.558      | -438                        | -39 | Hem; receptor binding; GO:0005102; ; GO:0005102                                                                                                                                                    |
| CG6143  | 2                 | -1.064      | -140                        | -45 | /                                                                                                                                                                                                  |
| CG14685 | 1                 | -1.318      | -96                         |     | CG14685                                                                                                                                                                                            |
| CG1483  | 1                 | -1.245      | -83                         |     | Map205; microtubule binding; ; GO:0008017; ; GO:0008017; ; GO:0008017                                                                                                                              |
| CG1646  | 2                 | -1.121      | -38                         | -15 | CG1646; pre-mRNA splicing factor activity; GO:0008248; ; GO:0008248                                                                                                                                |
| CG18572 | 1                 | -1.124      | -299                        |     | /                                                                                                                                                                                                  |
| CG4303  | 1                 | -1.062      | -217                        |     | Bap60; chromatin binding; ; GO:0003682; general RNA polymerase II transcription factor activity; ; GO:0016251; ; GO:0016251                                                                        |
| CG4954  | 1                 | -1.745      | -220                        |     | eIF3-S8; translation initiation factor activity; ; GO:0003743; ; GO:0003743; ; GO:0003743                                                                                                          |

|         |   |          |       |       |     |                                                                                                                                                                                                                                                                                                                                            |
|---------|---|----------|-------|-------|-----|--------------------------------------------------------------------------------------------------------------------------------------------------------------------------------------------------------------------------------------------------------------------------------------------------------------------------------------------|
| CG9253  | 1 | -1.388   | -47   |       |     | CG9253; nucleic acid binding; ; GO:0003676; ; ; GO:0003676; ATP-dependent RNA helicase activity; ; GO:0004004; ; GO:0004004                                                                                                                                                                                                                |
| CG6945  | 1 | -1.4435  | -13   |       |     | CG6945                                                                                                                                                                                                                                                                                                                                     |
| CG9128  | 1 | -1.138   | -269  |       |     | Sac1; polyphosphoinositide phosphatase activity; ; GO:0017120; ; ; GO:0017120                                                                                                                                                                                                                                                              |
| CG10353 | 1 | -1.183   | -67   |       |     | CG10353                                                                                                                                                                                                                                                                                                                                    |
| CG11190 | 1 | -1.279   | -44   |       |     | CG11190; attachment of GPI anchor to protein; GO:0016255                                                                                                                                                                                                                                                                                   |
| CG5902  | 2 | -1.093   | -80   | -24   |     | CG5902; molecular_function unknown; GO:0005554; ; GO:0005554                                                                                                                                                                                                                                                                               |
| CG1242  | 1 | -1.614   | -240  |       |     | Hsp83; ATPase activity, coupled; ; GO:0042623; ; ; GO:0042623                                                                                                                                                                                                                                                                              |
| CG7425  | 1 | -1.325   | -140  |       |     | /                                                                                                                                                                                                                                                                                                                                          |
| CG7769  | 1 | -1.289   | -209  |       |     | DDB1; damaged DNA binding; GO:0003684; ; GO:0003684                                                                                                                                                                                                                                                                                        |
| CG6801  | 1 | -1.149   | -104  |       |     | /                                                                                                                                                                                                                                                                                                                                          |
| CG8188  | 2 | -1.139   | -100  | -92   |     | CG8188; ubiquitin conjugating enzyme activity; ; GO:0004840; ligase activity; ; GO:0016874 ; EC:6.-.-.-; ; ; GO:0016874 ; GO:0004840                                                                                                                                                                                                       |
| CG6120  | 1 | -1.03835 | -131  |       |     | Tsp96F; receptor binding; GO:0005102; ; GO:0005102                                                                                                                                                                                                                                                                                         |
| CG11259 | 2 | -1.89    | -2570 | -56   |     | /                                                                                                                                                                                                                                                                                                                                          |
| CG12301 | 2 | -1.118   | -4265 | -42   |     | CG12301                                                                                                                                                                                                                                                                                                                                    |
| CG2135  | 2 | -1.011   | -4767 | -363  |     | CG2135; beta-glucuronidase activity; ; GO:0004566 ; EC:3.2.1.31; ; ; GO:0004566 ; EC:3.2.1.31                                                                                                                                                                                                                                              |
| CG5874  | 2 | -1.176   | -4605 | -116  |     | CG5874; RNA binding; GO:0003723; ; GO:0003723                                                                                                                                                                                                                                                                                              |
| CG1810  | 3 | -1.1     | -4789 | -560  | -13 | mRNA-capping-enzyme; protein tyrosine/serine/threonine phosphatase activity; ; GO:0008138 ; EC:3.1.3.-; mRNA guanylyltransferase activity; ; GO:0004484 ; EC:2.7.7.50; ; ; GO:0008138 ; EC:3.1.3.-; ; ; GO:0004484 ; E                                                                                                                     |
| CG13900 | 3 | -1.039   | -623  | -61   | -32 | CG13900; poly(A) binding; ; GO:0008143; damaged DNA binding; ; GO:0003684; ; ; GO:0003684; pre-mRNA splicing factor GO:0008248; ; ; GO:0008143; ; ; GO:0008248                                                                                                                                                                             |
| CG2165  | 2 | -1.14    | -1262 | -18   |     | CG2165; calcium-transporting ATPase activity; ; GO:0005388 ; EC:3.6.3.8; ; ; GO:0005388 ; EC:3.6.3.8                                                                                                                                                                                                                                       |
| CG10687 | 2 | -1.286   | -1848 | -390  |     | BcDNA:GH06451/ RNA binding; ; GO:0003723; asparagine-tRNA ligase activity; ; GO:0004816 ; EC:6.1.1.22; ; ; GO:0004816 ; EC:6.1.1.22; ; ; GO:0003723; ; ; GO:0004816 ; EC:6.1.1.22; RNA binding; ; GO:0003723; asparagine-tRNA ligase activity; ; ; EC:6.1.1.22; ; ; GO:0004816 ; EC:6.1.1.22; ; ; GO:0003723; ; ; GO:0004816 ; EC:6.1.1.22 |
| CG13691 | 1 | -1.2     | -1996 |       |     | CG13691                                                                                                                                                                                                                                                                                                                                    |
| CG9915  | 1 | -1.123   | -1771 |       |     | CG9915                                                                                                                                                                                                                                                                                                                                     |
| CG6204  | 1 | -1.2847  | -956  |       |     | CG6204; nucleic acid binding; GO:0003676; ; GO:0003676; DNA helicase activity; GO:0003678; RNA helicase activity; GO:0003678; EC:2.7.7.-; helicase activity; GO:0004386; ; GO:0003724 ; EC:2.7.7                                                                                                                                           |
| CG2666  | 2 | -1.045   | -962  | -950  |     | kkv; chitin synthase activity; GO:0004100 ; EC:2.4.1.16; ; GO:0004100 ; EC:2.4.1.16; ; GO:0004100 ; EC:2.4.1.16; ; GO:0004100 ; EC:2.4.1.16; ; GO:0004100 ; EC:2.4.1.16                                                                                                                                                                    |
| CG9191  | 1 | -1.87    | -1818 |       |     | Klp61F; motor activity; ; GO:0003774; structural constituent of cytoskeleton; ; GO:0005200; microtubule motor activity; ; GO:0003777; plus-end-directed microtubule motor activity; ; GO:0003777                                                                                                                                           |
| CG6767  | 1 | -1.2725  | -1580 |       |     | /                                                                                                                                                                                                                                                                                                                                          |
| CG12325 | 1 | -1.425   | -1987 |       |     | CG12325; cell cycle; ; GO:0007049; cytokinesis; ; GO:0000910; mitosis; ; GO:0007067                                                                                                                                                                                                                                                        |
| CG1341  | 1 | -1.243   | -1380 |       |     | Rpt1; endopeptidase activity; ; GO:0004175; ATPase activity; ; GO:0016887; ; ; GO:0016887; ; ; GO:0004175                                                                                                                                                                                                                                  |
| CG1874  | 1 | -1.0517  | -1899 |       |     | CG1874                                                                                                                                                                                                                                                                                                                                     |
| CG8502  | 1 | -1.7881  | -1887 |       |     | CG8502; structural constituent of larval cuticle (sensu Insecta); ; GO:0008010; ; ; GO:0008010                                                                                                                                                                                                                                             |
| CG7033  | 2 | -1.056   | -2794 | -1196 |     | CG7033; ATPase activity, coupled; GO:0042623; ; GO:0042623                                                                                                                                                                                                                                                                                 |
| CG10363 | 1 | -1.456   | -4476 |       |     | TepIV; protease inhibitor activity; ; GO:0030414; ; ; GO:0030414                                                                                                                                                                                                                                                                           |
| CG10697 | 1 | -1.3805  | -3555 |       |     | /                                                                                                                                                                                                                                                                                                                                          |
| CG10954 | 1 | -1.5     | -3186 |       |     | Arc-p34; actin binding; ; GO:0003779; ; ; GO:0003779; ; ; GO:0003779; structural constituent of cytoskeleton; ; GO:0005200                                                                                                                                                                                                                 |

|         |   |          |       |       |                                                                                                                                                                                                  |
|---------|---|----------|-------|-------|--------------------------------------------------------------------------------------------------------------------------------------------------------------------------------------------------|
| CG11822 | 1 | -1.026   | -2561 |       | nAcRbeta-21C; nicotinic acetylcholine-activated cation-selective channel activity; ; GO:0004889; ; ; GO:0004889; ; ; GO:000                                                                      |
| CG5001  | 1 | -1.0995  | -2235 |       | CG5001; defense response; ; GO:0006952; protein folding; ; GO:0006457; response to heat; ; GO:0009408; response to str<br>GO:0006950                                                             |
| CG5776  | 1 | -1.241   | -3231 |       | CG5776; ATPase activity; ; GO:0016887; ; ; GO:0016887                                                                                                                                            |
| CG7294  | 1 | -1.116   | -2600 |       | CG7294                                                                                                                                                                                           |
| CG7296  | 1 | -1.307   | -4881 |       | CG7296                                                                                                                                                                                           |
| CG9188  | 2 | -1.26    | -4220 | -3581 | sip2, CG9188                                                                                                                                                                                     |
| CG9246  | 1 | -1.112   | -4643 |       | CG9246; molecular_function unknown; ; GO:0005554; ; ; GO:0005554                                                                                                                                 |
| CG11073 | 2 | -1.451   | -3243 | -2348 | CG11073                                                                                                                                                                                          |
| CG3830  | 1 | -3.682   | -4023 |       | vg; wing margin morphogenesis; ; GO:0008587; wing morphogenesis; ; GO:0007476                                                                                                                    |
| CG6530  | 1 | -1.477   | -3818 |       | mthl3; G-protein coupled receptor activity; ; GO:0004930; ; ; GO:0004930; ; ; GO:0004930                                                                                                         |
| CG8414  | 1 | -1.569   | -3875 |       | CG8414                                                                                                                                                                                           |
| CG8811  | 1 | -1.146   | -4240 |       | muskelin; cell adhesion; ; GO:0007155; cytoskeleton organization and biogenesis; ; GO:0007010                                                                                                    |
| CG14059 | 1 | -2.0365  | -4434 |       | /                                                                                                                                                                                                |
| CG17947 | 1 | -2.06    | -2135 |       | alpha-Cat; actin binding; GO:0003779; ; GO:0003779; cytoskeletal protein binding; GO:0008092; ; GO:0008092; cadherin b<br>GO:0045296; structural constituent of cytoskeleton; GO:0005200; ; GO:0 |
| CG1898  | 1 | -1.228   | -3431 |       | HBS1; translation release factor activity; ; GO:0003747; translation elongation factor activity; ; GO:0003746; ; ; GO:000374<br>GO:0003747                                                       |
| CG3424  | 1 | -1.11605 | -4385 |       | /                                                                                                                                                                                                |
| CG6650  | 1 | -1.081   | -2348 |       | CG6650                                                                                                                                                                                           |
| CG6897  | 1 | -1.132   | -4729 |       | CG6897                                                                                                                                                                                           |
| CG11990 | 1 | -1.058   | -4250 |       | CG11990                                                                                                                                                                                          |
| CG2512  | 1 | -1.289   | -3269 |       | alphaTub84D; GTP binding; GO:0005525; ; GO:0005525; structural constituent of cytoskeleton; GO:0005200; tubulin binding<br>GO:0015631; ; GO:0005200; ; GO:0015631                                |
| CG5913  | 1 | -1.15885 | -4977 |       | CG5913                                                                                                                                                                                           |
| CG6378  | 2 | -1.511   | -4572 | -3750 | BM-40-SPARC; structural molecule activity; GO:0005198; growth factor activity; GO:0008083; ; GO:0005198; ; GO:0008083                                                                            |
| CG6962  | 1 | -1.352   | -3502 |       | CG6962                                                                                                                                                                                           |
| CG8064  | 1 | -1.2695  | -4227 |       | CG8064                                                                                                                                                                                           |
| CG8165  | 1 | -1.508   | -2928 |       | CG8165; transcription regulator activity; GO:0030528; ; GO:0030528                                                                                                                               |
| CG9373  | 1 | -1.002   | -2753 |       | CG9373; RNA binding; GO:0003723; ; GO:0003723                                                                                                                                                    |
| CG31998 | 1 | -1.01353 | -4331 |       | CG11572, CG11578                                                                                                                                                                                 |
| CG11750 | 1 | -1.26    | -3436 |       | CG11750                                                                                                                                                                                          |
