# Supplementary material for: Regulation of cellular plasticity in Drosophila imaginal disc cells by the Polycomb group, trithorax group and lama genes
Source: Oxford University Press journal article supplement (doi:10.1242/dev.01927), 2005-08-02
Supplement: dev01927-sup-table11.pdf [file dev01927-sup-table11.pdf]

**Table S11. *PcG* and *lama* genes function in transdetermination**

| Genotype                                                                                                              | Disc: vgBE- <i>lacZ</i> (frequency) | Disc: vgBE- <i>lacZ</i> (proportion)* | Cuticle: leg to wing (frequency) |
|-----------------------------------------------------------------------------------------------------------------------|-------------------------------------|---------------------------------------|----------------------------------|
| <i>y flp; vgBE-LacZ/+ ; Act&gt;&gt;wg/+</i>                                                                           | 33/104 (31.7%)                      | <i>n</i> =23 (5%)                     | 17/69 (25%)                      |
| <i>y flp; vgBE-LacZ/+ ; Act&gt;&gt;wg, Scm<sup>+</sup>/Scm<sup>D1</sup></i><br>(heterozygous loss of function)        | 28/85 (33%)<br><i>P</i> =0.99       | <i>n</i> =28 (5%)<br><i>P</i> =0.17   | 14/40 (35%)<br><i>P</i> =0.25    |
| <i>y flp; vgBE-LacZ/+ ; Act&gt;&gt;wg, E(z)<sup>+</sup>/E(z)<sup>61</sup></i><br>(heterozygous loss of function)      | 41/51 (80%)<br><i>P</i> ≤0.001      | <i>n</i> =41 (6%)<br><i>P</i> =0.10   | 14/42 (33%)<br><i>P</i> =0.32    |
| <i>y flp; vgBE-LacZ/+ ; Act&gt;&gt;wg, Pc<sup>+</sup>/Pc<sup>1</sup></i><br>(heterozygous amorph)                     | 29/58 (50%)<br><i>P</i> ≤0.05       | <i>n</i> =29 (5%)<br><i>P</i> =0.14   | 9/36 (25%)<br><i>P</i> =0.97     |
| <i>y flp; vgBE-LacZ/+ ; Act&gt;&gt;wg, E(Pc)<sup>+</sup>/E(Pc)<sup>1</sup></i><br>(heterozygous)                      | 22/37 (59%)<br><i>P</i> ≤0.01       | <i>n</i> =22 (2%)<br><i>P</i> <0.05   | 7/21 (33%)<br><i>P</i> =0.4      |
| <i>y flp; vgBE-LacZ, Su(z)2<sup>+</sup>/Su(Z)2<sup>1</sup>; Act&gt;&gt;wg/+</i><br>(heterozygous antimorph)           | 0/24 (0%)<br><i>P</i> ≤0.01         |                                       | ∅ <sup>†</sup>                   |
| <i>y flp; vgBE-LacZ, Su(z)2<sup>+</sup>/Su(Z)2<sup>1.b7</sup>; Act&gt;&gt;wg/+</i><br>(heterozygous loss of function) | 0/27 (0%)<br><i>P</i> ≤0.01         |                                       | ∅ <sup>†</sup>                   |
| <i>y flp; vgBE-LacZ/+ ; Act&gt;&gt;wg, brm<sup>+</sup>/brm<sup>2</sup></i><br>(heterozygous amorph)                   | 23/30 (77%)<br><i>P</i> ≤0.001      | <i>n</i> =23 (2%)<br><i>P</i> ≤0.0001 | 24/41 (59%)<br><i>P</i> ≤0.001   |
| <i>y flp; vgBE-LacZ/+ ; Act&gt;&gt;wg, osa<sup>+</sup>/osa<sup>2</sup></i><br>(heterozygous hypomorph)                | 13/18 (72%)<br><i>P</i> ≤0.01       | <i>n</i> =13 (3%)<br><i>P</i> <0.05   | 11/40 (28%)<br><i>P</i> =0.74    |
| <i>y flp; vgBE-LacZ/Act&gt;&gt;wg ; lama<sup>410</sup>/lama<sup>410</sup></i><br>(homozygous loss of function)        | 20/67 (30%)<br><i>P</i> =0.71       | <i>n</i> =20 (2%)<br><i>P</i> <0.01   | 5/35 (15%)<br><i>P</i> =0.2      |

\*Percent of total median area.

†No adult survivors.
