# Supplementary material for: Regulation of cellular plasticity in Drosophila imaginal disc cells by the Polycomb group, trithorax group and lama genes
Source: Oxford University Press journal article supplement (doi:10.1242/dev.01927), 2005-08-02
Supplement: dev01927supptable_1.pdf [file dev01927supptable_1.pdf]

**Table S1. Nine categories of microarray experiments**

| Category # | Experiment                                                              | Array ID | Cy3 Channel           | Cy5 Channel           |
|------------|-------------------------------------------------------------------------|----------|-----------------------|-----------------------|
| 1          | wildtype prothoracic leg disc (wt 1st leg) vs. reference sample         | 5-069    | reference sample      | wt 1st leg            |
|            |                                                                         | 5-131    | reference sample      | wt 1st leg            |
|            |                                                                         | 5-085    | reference sample      | wt 1st leg            |
|            |                                                                         | AK93     | wt 1st leg            | reference sample      |
| 2          | wing disc vs. leg disc of the same animal (all wildtype)                | 5-251    | wing disc             | prothoracic leg disc  |
|            |                                                                         | 5-256    | prothoracic leg disc  | wing disc             |
|            |                                                                         | 6-59     | wing disc             | prothoracic leg disc  |
|            |                                                                         | 5-249    | mesothoracic leg disc | wing disc             |
|            |                                                                         | 5-255    | wing disc             | mesothoracic leg disc |
|            |                                                                         | 6-62     | mesothoracic leg disc | wing disc             |
|            |                                                                         | 5-248    | wing disc             | metathoracic leg disc |
|            |                                                                         | 5-254    | metathoracic leg disc | wing disc             |
|            |                                                                         | 6-64     | wing disc             | metathoracic leg disc |
| 3          | wg-induced prothoracic leg disc (wg+ 1st leg disc) vs. reference sample | 6-069    | reference sample      | wg+ 1st leg disc      |
|            |                                                                         | 7-067    | reference sample      | wg+ 1st leg disc      |
|            |                                                                         | 7-159    | wg+ 1st leg disc      | reference sample      |
|            |                                                                         | 7-049    | wg+ 1st leg disc      | reference sample      |
|            |                                                                         | 7-065    | wg+ 1st leg disc      | reference sample      |
|            |                                                                         | 7-078    | reference sample      | wg+ 1st leg disc      |

|   |                                                                                                |       |                           |                           |
|---|------------------------------------------------------------------------------------------------|-------|---------------------------|---------------------------|
| 4 | microdissected TD cells vs. surrounding Dwg cells of the same wg-induced prothoracic leg discs | 7-041 | TD cells                  | Dwg cells                 |
|   |                                                                                                | 7-210 | TD cells                  | Dwg cells                 |
|   |                                                                                                | 7-047 | Dwg cells                 | TD cells                  |
| 5 | microdissected TD cells vs. Vwg cells of the same wg-induced prothoracic leg discs             | 7-044 | Vwg cells                 | TD cells                  |
|   |                                                                                                | 7-204 | Vwg cells                 | TD cells                  |
|   |                                                                                                | 7-035 | TD cells                  | Vwg cells                 |
|   |                                                                                                | 7-050 | TD cells                  | Vwg cells                 |
|   |                                                                                                | 7-226 | TD cells                  | Vwg cells                 |
| 6 | Dwg cells vs. Vwg cells of the same wg-induced prothoracic leg discs                           | 7-046 | Dwg cells                 | Vwg cells                 |
|   |                                                                                                | 7-048 | Vwg cells                 | Dwg cells                 |
|   |                                                                                                | 7-218 | Vwg cells                 | Dwg cells                 |
| 7 | TD cells vs. D cells of wildtype prothoracic leg discs                                         | 7-017 | wildtype D cells          | TD cells                  |
|   |                                                                                                | 7-008 | wildtype D cells          | TD cells                  |
| 8 | D cells of wildtype prothoracic leg discs vs. V cells of the same discs                        | 7-018 | wildtype D cells          | wildtype V cells          |
|   |                                                                                                | 7-020 | wildtype V cells          | wildtype D cells          |
|   |                                                                                                | 7-059 | wildtype D cells          | wildtype V cells          |
| 9 | 3/4 fragment of 2nd leg imaginal disc after cultivation vs. reference sample                   | 5-121 | 3/4 fragment 2nd leg disc | reference sample          |
|   |                                                                                                | 5-129 | 3/4 fragment 2nd leg disc | reference sample          |
|   |                                                                                                | 5-189 | reference sample          | 3/4 fragment 2nd leg disc |
|   |                                                                                                | 5-122 | reference sample          | 3/4 fragment 2nd leg disc |
