# Supplementary material for: Regulation of cellular plasticity in Drosophila imaginal disc cells by the Polycomb group, trithorax group and lama genes
Source: Oxford University Press journal article supplement (doi:10.1242/dev.01927), 2005-08-02
Supplement: dev01927supptable_2.pdf [file dev01927supptable_2.pdf]

**Table S2****Genes preferentially expressed in wildtype wing and leg discs**

| CG Number   | Synonym    | Median (log2) | p-value  |
|-------------|------------|---------------|----------|
| <b>Wing</b> |            |               |          |
| CG10197     | kn         | -5.50         | 1.84E-03 |
| CG3830      | vg         | -5.34         | 5.23E-05 |
| CG10619     | tup        | -4.03         | 2.65E-05 |
| CG5966      | CG5966     | -3.91         | 3.85E-06 |
| CG8376      | ap         | -3.44         | 1.14E-08 |
| CG4382      | CG4382     | -3.17         | 3.02E-04 |
| CG1897      | msh, Dr    | -3.01         | 2.39E-07 |
| CG12843     | Tsp42Ei    | -2.99         | 3.31E-04 |
| CG12287     | pdm2       | -2.74         | 7.38E-07 |
| CG7160      | CG7160     | -2.60         | 1.17E-03 |
| CG10570     | CG10570    | -2.58         | 9.35E-03 |
| CG1803      | regucalcin | -2.49         | 2.74E-03 |
| CG9023      | Drip       | -2.49         | 4.01E-06 |
| CG2663      | CG2663     | -2.45         | 1.84E-03 |
| CG3132      | Ect3       | -2.42         | 4.68E-04 |
| CG4914      | CG4914     | -2.36         | 9.54E-07 |
| CG9554      | eya        | -2.35         | 5.96E-05 |
| CG9427      | CG9427     | -2.31         | 1.03E-06 |
| CG9623      | if         | -2.30         | 9.48E-08 |
| CG10501     | amd        | -2.29         | 3.45E-03 |
| CG1698      | CG1698     | -2.17         | 1.60E-03 |
| CG8501      | CG8501     | -2.17         | 1.10E-03 |
| CG7539      | Edg91      | -2.13         | 3.93E-02 |
| CG7924      | CG7924     | -2.11         | 4.13E-05 |
| CG9008      | CG9008     | -2.08         | 5.72E-09 |
| CG4766      | CG4766     | -2.07         | 4.26E-05 |
| CG9358      | Phk-3      | -2.05         | 1.78E-05 |
| CG5397      | CG5397     | -1.99         | 1.95E-02 |
| CG1058      | rpk        | -1.98         | 1.45E-05 |
| CG5518      | sda        | -1.89         | 5.45E-04 |
| CG9307      | CG9307     | -1.87         | 1.01E-04 |
| CG5187      | Doc2       | -1.72         | 7.42E-06 |
| CG8404      | Sox15      | -1.69         | 8.62E-07 |
| CG10704     | toe        | -1.67         | 1.36E-04 |
| CG5133      | Doc1       | -1.60         | 5.40E-04 |
| CG1089      | alpha-Est5 | -1.59         | 3.61E-02 |

|         |           |       |          |
|---------|-----------|-------|----------|
| CG5093  | Doc3      | -1.48 | 1.10E-05 |
| CG17348 | drl       | -1.43 | 1.08E-06 |
| CG16885 | CG16885   | -1.35 | 4.52E-05 |
| CG10962 | CG10962   | -1.31 | 3.73E-02 |
| CG3385  | navy      | -1.29 | 3.36E-03 |
| CG17044 | yellow-e2 | -1.29 | 2.32E-04 |
| CG6044  | CG6044    | -1.26 | 3.11E-07 |
| CG6680  | CG6680    | -1.25 | 5.45E-03 |
| CG12023 | GV1       | -1.25 | 3.19E-05 |
| CG9812  | CG9812    | -1.22 | 8.27E-05 |
| CG15064 | Him       | -1.21 | 4.51E-03 |
| CG8502  | CG8502    | -1.18 | 6.62E-05 |
| CG4746  | mab-2     | -1.17 | 6.96E-04 |
| CG18657 | NetA      | -1.15 | 2.77E-06 |
| CG7052  | TepII     | -1.13 | 3.75E-05 |
| CG30069 | CG13017   | -1.12 | 6.40E-03 |
| CG2762  | ush       | -1.10 | 3.35E-05 |
| CG11905 | CG11905   | -1.10 | 1.12E-04 |
| CG7820  | CAH1      | -1.09 | 3.16E-05 |
| CG4319  | rpr       | -1.07 | 2.52E-05 |
| CG7811  | b         | -1.06 | 5.95E-03 |
| CG5392  | CG5392    | -1.04 | 5.66E-04 |
| CG11835 | CG11835   | -1.02 | 4.24E-04 |
| CG16959 | CG16959   | -0.94 | 5.13E-06 |
| CG17559 | dnt       | -0.94 | 9.93E-07 |
| CG9552  | rost      | -0.94 | 2.39E-05 |
| CG9266  | CG9266    | -0.88 | 6.57E-04 |
| CG15093 | CG15093   | -0.88 | 8.04E-05 |
| CG17941 | ds        | -0.88 | 2.33E-05 |
| CG17032 | CG17032   | -0.86 | 1.66E-05 |
| CG1794  | Mmp2      | -0.86 | 7.39E-04 |

## Leg

|         |         |      |          |
|---------|---------|------|----------|
| CG7807  | AP-2    | 6.68 | 7.37E-05 |
| CG5893  | D       | 5.40 | 2.87E-05 |
| CG11922 | fd96Cb  | 4.68 | 3.33E-04 |
| CG6269  | unc-4   | 4.50 | 3.14E-06 |
| CG6570  | lbl     | 4.46 | 2.80E-08 |
| CG10382 | wrapper | 4.41 | 1.97E-05 |
| CG3388  | gsb     | 4.22 | 2.34E-05 |
| CG6414  | CG6414  | 3.93 | 2.11E-04 |
| CG11354 | Lim1    | 3.71 | 5.33E-04 |
| CG18111 | Obp99a  | 3.61 | 1.84E-06 |

|         |           |      |          |
|---------|-----------|------|----------|
| CG11921 | fd96Ca    | 3.06 | 3.36E-04 |
| CG4605  | Acp32CD   | 2.91 | 1.47E-04 |
| CG5888  | CG5888    | 2.86 | 3.82E-03 |
| CG4501  | bgm       | 2.59 | 4.07E-06 |
| CG6604  | H15       | 2.16 | 1.79E-03 |
| CG10440 | CG10440   | 1.92 | 8.55E-07 |
| CG2056  | CG2056    | 1.90 | 3.73E-09 |
| CG17131 | SP71      | 1.89 | 8.01E-04 |
| CG9747  | CG9747    | 1.86 | 9.47E-04 |
| CG1004  | rho       | 1.81 | 5.24E-08 |
| CG33207 | pxb       | 1.77 | 5.96E-07 |
| CG13023 | CG13023   | 1.74 | 1.59E-05 |
| CG14191 | CG14191   | 1.73 | 1.40E-02 |
| CG3479  | osp       | 1.68 | 2.00E-08 |
| CG17943 | comm      | 1.54 | 1.06E-05 |
| CG10546 | Cralbp    | 1.47 | 6.34E-04 |
| CG2360  | Ccp84Aa   | 1.47 | 1.07E-02 |
| CG10108 | phyl      | 1.45 | 3.32E-03 |
| CG9196  | CG9196    | 1.44 | 8.56E-07 |
| CG2341  | Ccp84Ad   | 1.43 | 2.30E-03 |
| CG10241 | Cyp6a17   | 1.43 | 9.21E-05 |
| CG4559  | Idgf3     | 1.28 | 2.74E-02 |
| CG8333  | HLHmgamma | 1.25 | 1.49E-05 |
| CG3827  | sc        | 1.23 | 3.35E-06 |
| CG9801  | CG9801    | 1.23 | 2.28E-02 |
| CG3851  | odd       | 1.21 | 5.33E-06 |
| CG15085 | edl       | 1.17 | 4.28E-05 |
| CG7088  | bnb       | 1.16 | 2.23E-06 |
| CG31869 | CG17130   | 1.13 | 3.43E-04 |
| CG11121 | so        | 1.07 | 7.51E-06 |
| CG1916  | Wnt2      | 1.07 | 7.19E-08 |
| CG13082 | CG13082   | 1.02 | 5.50E-05 |
| CG3649  | CG3649    | 1.02 | 1.63E-05 |
| CG9336  | CG9336    | 1.02 | 4.82E-04 |
| CG7194  | CG7194    | 1.02 | 1.13E-06 |
| CG17211 | CG17211   | 0.98 | 1.40E-03 |
| CG6234  | CG6234    | 0.97 | 2.56E-02 |
| CG32150 | CG12712   | 0.97 | 3.33E-02 |
| CG4969  | Wnt6      | 0.97 | 1.17E-05 |
| CG8363  | Paps      | 0.96 | 2.60E-05 |
| CG10433 | CG10433   | 0.95 | 2.09E-02 |
| CG15757 | CG15757   | 0.93 | 3.41E-04 |
| CG7447  | CG7447    | 0.92 | 1.25E-02 |
| CG7231  | CG7231    | 0.91 | 8.99E-06 |
| CG7294  | CG7294    | 0.90 | 2.06E-05 |

|                |                |             |                 |
|----------------|----------------|-------------|-----------------|
| <b>CG2062</b>  | <b>Cyp4e1</b>  | <b>0.89</b> | <b>4.14E-04</b> |
| <b>CG3396</b>  | <b>Ocho</b>    | <b>0.89</b> | <b>1.62E-03</b> |
| <b>CG1342</b>  | <b>CG1342</b>  | <b>0.89</b> | <b>5.07E-07</b> |
| <b>CG9674</b>  | <b>CG9674</b>  | <b>0.88</b> | <b>8.64E-05</b> |
| <b>CG11797</b> | <b>Obp56a</b>  | <b>0.88</b> | <b>5.77E-04</b> |
| <b>CG11136</b> | <b>CG11136</b> | <b>0.87</b> | <b>2.02E-02</b> |
| <b>CG3629</b>  | <b>Dll</b>     | <b>0.86</b> | <b>7.56E-05</b> |
