# Supplementary material for: Regulation of cellular plasticity in Drosophila imaginal disc cells by the Polycomb group, trithorax group and lama genes
Source: Oxford University Press journal article supplement (doi:10.1242/dev.01927), 2005-08-02
Supplement: dev01927supptable_3.pdf [file dev01927supptable_3.pdf]

**Table S3**

**Genes preferentially expressed in dorsal or ventral cell populations of wildtype and Wg over-expressing leg discs**

| D(wt)   |           |               |          |                                                                                                                                                                                                 |
|---------|-----------|---------------|----------|-------------------------------------------------------------------------------------------------------------------------------------------------------------------------------------------------|
| CG#     | Synonym   | median (log2) | p-value  | Function                                                                                                                                                                                        |
| CG13067 | CG13067   | -3.23         | 4.66E-02 | /                                                                                                                                                                                               |
| CG8827  | Ance      | -2.97         | 5.27E-03 | zinc ion binding; ; GO:0008270; peptidyl-dipeptidase activity; ; GO:0008241 ; EC:3.4.15.-; ; GO:0008241 ; EC:3.4.15.-; peptidyl-dipeptidase A activity; ; GO:0004246 ; EC:3.4.15.1; ; GO:000424 |
| CG4766  | CG4766    | -2.68         | 3.20E-02 | /                                                                                                                                                                                               |
| CG18111 | Obp99a    | -2.63         | 1.90E-02 | odorant binding, ; GO:0005549                                                                                                                                                                   |
| CG5133  | Doc1      | -2.36         | 1.22E-02 | transcription factor activity; ; GO:0003700; ; GO:0003700                                                                                                                                       |
| CG16820 | CG16820   | -2.07         | 1.93E-02 | /                                                                                                                                                                                               |
| CG10625 | CG10625   | -1.83         | 5.22E-03 | /                                                                                                                                                                                               |
| CG15101 | Jheh1     | -1.78         | 7.53E-03 | juvenile hormone epoxide hydrolase activity; ; GO:0008096 ; EC:3.3.2.-; ; GO:0008096 ; EC:3.3.2.-; epoxide hydrolase activity; ; GO:0004301 ; EC:3.3.2.3; ; GO:0004301 ; EC:3.3.2.3; ; GO:000   |
| CG3935  | al        | -1.77         | 1.44E-02 | specific RNA polymerase II transcription factor activity; ; GO:0003704; transcription factor activity; ; GO:0003700; ; GO:0003700; ; GO:0003704                                                 |
| CG5160  | CG5160    | -1.73         | 3.67E-02 | GTPase activity; ; GO:0003924; ; GO:0003924                                                                                                                                                     |
| CG8333  | HLHmgamma | -1.62         | 1.54E-02 | DNA binding; GO:0003677; ; GO:0003677; transcription factor activity; GO:0003700; specific transcriptional repressor activity; GO:0016566; ; GO:0003700; ; GO:0003700; ; GO:0016566             |
| CG1650  | unpg      | -1.59         | 4.25E-02 | RNA polymerase II transcription factor activity; ; GO:0003702; ; GO:0003702                                                                                                                     |
| CG6906  | CG6906    | -1.50         | 2.84E-02 | carbonate dehydratase activity; ; GO:0004089 ; EC:4.2.1.1; ; GO:0004089 ; EC:4.2.1.1                                                                                                            |
| CG15611 | CG15611   | -1.49         | 2.10E-02 | /                                                                                                                                                                                               |
| CG17914 | yellow-b  | -1.49         | 4.94E-02 | /                                                                                                                                                                                               |
| CG1698  | CG1698    | -1.42         | 4.71E-02 | potassium:amino acid transporter activity; ; GO:0017032; cation transporter activity; ; GO:0008324; ; GO:0008324; ; GO:0017032                                                                  |
| CG5093  | Doc3      | -1.41         | 3.79E-03 | transcription factor activity; ; GO:0003700; ; GO:0003700                                                                                                                                       |
| CG17348 | drl       | -1.39         | 2.70E-02 | transmembrane receptor protein tyrosine kinase activity; ; GO:0004714 ; EC:2.7.1.-; ; GO:0004714 ; EC:2.7.1.-; protein-tyrosine kinase activity; ; GO:0004713 ; EC:2.7.1.112; ; GO:0004713 ;    |
| CG17045 | yellow-e3 | -1.37         | 2.11E-03 | /                                                                                                                                                                                               |
| CG3244  | CG3244    | -1.36         | 1.91E-02 | /                                                                                                                                                                                               |
| CG9656  | grn       | -1.34         | 3.11E-02 | RNA polymerase II transcription factor activity; GO:0003702; general RNA polymerase II transcription factor activity; GO:0016251; ; GO:0003702; ; GO:0016251; ; GO:0016251                      |
| CG4914  | CG4914    | -1.29         | 2.54E-03 | trypsin activity; ; GO:0004295 ; EC:3.4.21.4; serine-type endopeptidase activity; ; GO:0004252 ; EC:3.4.21.-; ; GO:0004295 ; EC:3.4.21.4; ; GO:0004252 ; EC:3.4.21.-                            |
| CG10119 | LamC      | -1.24         | 2.28E-02 | structural constituent of cytoskeleton; ; GO:0005200; ; GO:0005200                                                                                                                              |
| CG12287 | pdm2      | -1.11         | 4.50E-02 | DNA binding; ; GO:0003677; ; GO:0003677; specific RNA polymerase II transcription factor activity; ; GO:0003704; ; GO:0003704; ; GO:0003704                                                     |
| CG9885  | dpp       | -1.10         | 1.12E-02 | signal transducer activity; ; GO:0004871; morphogen activity; ; GO:0016015; ; GO:0016015; transforming growth factor beta receptor binding; ; GO:0005160; ; GO:0005160; ; GO:0016015; ; GO:0004 |
| CG4746  | mab-2     | -1.09         | 3.95E-02 | encodes Mab-21, involved in cell fate determination                                                                                                                                             |
| CG10200 | CG10200   | -1.07         | 2.84E-03 | /                                                                                                                                                                                               |

|                |                      |              |                 |                                                                                                                                                                                                  |
|----------------|----------------------|--------------|-----------------|--------------------------------------------------------------------------------------------------------------------------------------------------------------------------------------------------|
| <b>CG12840</b> | <b>Tsp42EI</b>       | <b>-1.07</b> | <b>2.57E-02</b> | receptor signaling protein activity; ; GO:0005057; ; GO:0005057                                                                                                                                  |
| <b>CG8483</b>  | <b>CG8483</b>        | <b>-1.06</b> | <b>2.01E-02</b> | defense response; GO:0006952                                                                                                                                                                     |
| <b>CG9593</b>  | <b>CG9593</b>        | <b>-1.03</b> | <b>7.28E-03</b> | receptor binding; GO:0005102; ; GO:0005102                                                                                                                                                       |
| <b>CG6868</b>  | <b>tld</b>           | <b>-1.02</b> | <b>1.24E-02</b> | procollagen C-endopeptidase activity; GO:0017026 ; EC:3.4.24.19; metalloendopeptidase activity; GO:0004222 ; EC:3.4.24.-; ; GO:0017026 ; EC:3.4.24.19; ; GO:0004222 ; EC:3.4.24.-                |
| <b>CG5912</b>  | <b>arr</b>           | <b>-1.00</b> | <b>3.23E-02</b> | low-density lipoprotein receptor activity; ; GO:0005041; ; ; GO:0005041; ; ; GO:0005041; ; ; GO:0005041                                                                                          |
| <b>CG2125</b>  | <b>ci</b>            | <b>-0.97</b> | <b>2.15E-02</b> | specific RNA polymerase II transcription factor activity; ; GO:0003704; transcription factor activity; ; GO:0003700; transcriptional activator activity; ; GO:0016563; transcriptional represso  |
| <b>CG17559</b> | <b>dnt</b>           | <b>-0.96</b> | <b>1.06E-02</b> | protein-tyrosine kinase activity; ; GO:0004713 ; EC:2.7.1.112; ; ; GO:0004713 ; EC:2.7.1.112; transmembrane receptor protein tyrosine kinase activity; ; GO:0004714 ; EC:2.7.1.-; ; ; GO:0004714 |
| <b>CG14843</b> | <b>CG14843</b>       | <b>-0.96</b> | <b>1.32E-02</b> | /                                                                                                                                                                                                |
| <b>CG17058</b> | <b>Peritrophin-A</b> | <b>-0.95</b> | <b>2.24E-02</b> | chitin binding; ; GO:0008061; ; ; GO:0008061; structural constituent of peritrophic membrane (sensu Insecta); ; GO:0016490; ; ; GO:0016490                                                       |
| <b>CG7722</b>  | <b>CG7722</b>        | <b>-0.92</b> | <b>3.61E-03</b> | serine-type endopeptidase inhibitor activity; ; GO:0004867; ; ; GO:0004867                                                                                                                       |
| <b>CG7860</b>  | <b>CG7860</b>        | <b>-0.90</b> | <b>4.58E-02</b> | asparaginase activity; ; GO:0004067 ; EC:3.5.1.1; ; ; GO:0004067 ; EC:3.5.1.1                                                                                                                    |
| <b>CG14946</b> | <b>CG14946</b>       | <b>-0.86</b> | <b>2.20E-03</b> | oxidoreductase activity; ; GO:0016491 ; EC:1.-.-.-; ; ; GO:0016491 ; EC:1.-.-.-                                                                                                                  |
| <b>CG15905</b> | <b>CG15905</b>       | <b>-0.86</b> | <b>2.21E-02</b> | /                                                                                                                                                                                                |

#### D(wg)

| <b>CG#</b>     | <b>Synonym</b> | <b>median (log2)</b> | <b>p-value</b>  | <b>Function</b>                                                                                                                                                                                     |
|----------------|----------------|----------------------|-----------------|-----------------------------------------------------------------------------------------------------------------------------------------------------------------------------------------------------|
| <b>CG7539</b>  | <b>Edg91</b>   | <b>-3.03</b>         | <b>3.18E-02</b> | structural constituent of pupal cuticle (sensu Insecta); GO:0008011; ; GO:0008011                                                                                                                   |
| <b>CG7892</b>  | <b>nmo</b>     | <b>-1.65</b>         | <b>4.14E-02</b> | protein serine/threonine kinase activity; ; GO:0004674; receptor signaling protein serine/threonine kinase activity; ; GO:0004702 ; EC:2.7.1.-; ; ; GO:0004674; ; ; GO:0004674; ; ; GO:0004674; ; G |
| <b>CG14598</b> | <b>CG14598</b> | <b>-1.63</b>         | <b>4.54E-03</b> | /                                                                                                                                                                                                   |
| <b>CG6906</b>  | <b>CG6906</b>  | <b>-1.37</b>         | <b>1.23E-02</b> | carbonate dehydratase activity; ; GO:0004089 ; EC:4.2.1.1; ; ; GO:0004089 ; EC:4.2.1.1                                                                                                              |
| <b>CG8846</b>  | <b>Thor</b>    | <b>-1.24</b>         | <b>3.11E-03</b> | eukaryotic initiation factor 4E binding; ; GO:0008190; ; ; GO:0008190; ; ; GO:0008190; ; ; GO:0008190                                                                                               |
| <b>CG1956</b>  | <b>R</b>       | <b>-1.23</b>         | <b>4.42E-02</b> | GTP binding; ; GO:0005525; ; ; GO:0005525; GDP binding; ; GO:0019003; GTPase activity; ; GO:0003924; ; ; GO:0019003; ; ; GO:0003924                                                                 |
| <b>CG9425</b>  | <b>CG9425</b>  | <b>-1.16</b>         | <b>3.63E-02</b> | nucleic acid binding; ; GO:0003676; ; ; GO:0003676; DNA helicase activity; ; GO:0003678; helicase activity; ; GO:0004386; ; ; GO:0004386; ; ; GO:0003678                                            |
| <b>CG13679</b> | <b>CG13679</b> | <b>-1.11</b>         | <b>1.24E-02</b> | /                                                                                                                                                                                                   |
| <b>CG1691</b>  | <b>Imp</b>     | <b>-1.10</b>         | <b>1.13E-02</b> | mRNA binding; GO:0003729; ; GO:0003729; ; GO:0003729                                                                                                                                                |
| <b>CG15629</b> | <b>CG15629</b> | <b>-1.05</b>         | <b>3.19E-02</b> | oxidoreductase activity; ; GO:0016491 ; EC:1.-.-.-; ; ; GO:0016491 ; EC:1.-.-.-                                                                                                                     |
| <b>CG3935</b>  | <b>al</b>      | <b>-1.02</b>         | <b>3.68E-02</b> | specific RNA polymerase II transcription factor activity; ; GO:0003704; transcription factor activity; ; GO:0003700; ; ; GO:0003700; ; ; GO:0003704                                                 |
| <b>CG9192</b>  | <b>CG9192</b>  | <b>-1.01</b>         | <b>2.01E-02</b> | /                                                                                                                                                                                                   |
| <b>CG14191</b> | <b>CG14191</b> | <b>-0.88</b>         | <b>2.83E-02</b> | /                                                                                                                                                                                                   |

#### V(wt)

| <b>CG#</b>    | <b>Synonym</b> | <b>median (log2)</b> | <b>p-value</b>  | <b>Function</b>                                                                                                                                                                                         |
|---------------|----------------|----------------------|-----------------|---------------------------------------------------------------------------------------------------------------------------------------------------------------------------------------------------------|
| <b>CG4889</b> | <b>wg</b>      | <b>4.80</b>          | <b>1.88E-02</b> | frizzled-2 binding; ; GO:0005110; ; ; GO:0005110; ; ; GO:0005110; receptor binding; ; GO:0005102; Notch binding; ; GO:0005112; signal transducer activity; ; GO:0004871; morphogen activity; ; GO:00160 |

|                |                |             |                 |                                                                                                                                                                                                       |
|----------------|----------------|-------------|-----------------|-------------------------------------------------------------------------------------------------------------------------------------------------------------------------------------------------------|
| <b>CG4969</b>  | <b>Wnt6</b>    | <b>3.83</b> | <b>4.55E-03</b> | receptor binding; ; GO:0005102; ; ; GO:0005102; signal transducer activity; ; GO:0004871; ; ; GO:0005102; ; ; GO:0004871                                                                              |
| <b>CG6570</b>  | <b>lbl</b>     | <b>3.30</b> | <b>9.89E-03</b> | specific RNA polymerase II transcription factor activity; GO:0003704; ; GO:0003704                                                                                                                    |
| <b>CG16785</b> | <b>fz3</b>     | <b>2.62</b> | <b>5.25E-03</b> | Wnt-protein binding; ; GO:0017147; transmembrane receptor activity; ; GO:0004888; Wnt receptor activity; ; GO:0042813; G-protein coupled receptor activity; ; GO:0004930; ; ; GO:0004888; ; ; GO:0004 |
| <b>CG13857</b> | <b>CG13857</b> | <b>2.36</b> | <b>4.06E-02</b> | /                                                                                                                                                                                                     |
| <b>CG4559</b>  | <b>Idgf3</b>   | <b>2.33</b> | <b>2.08E-02</b> | imaginal disc growth factor activity; ; GO:0008084; NOT chitinase activity; ; GO:0004568 ; EC:3.2.1.14; hydrolase activity, hydrolyzing N-glycosyl compounds; ; GO:0016799 ; EC:3.2.2.-; ; ; GO:0     |
| <b>CG7777</b>  | <b>CG7777</b>  | <b>2.28</b> | <b>2.86E-03</b> | water transporter activity; ; GO:0005372; carrier activity; ; GO:0005386; binding; ; GO:0005488; ; ; GO:0005488; ; ; GO:0005386; ; ; GO:0005372                                                       |
| <b>CG8376</b>  | <b>ap</b>      | <b>2.18</b> | <b>3.36E-02</b> | zinc ion binding; ; GO:0008270; specific RNA polymerase II transcription factor activity; ; GO:0003704; ; ; GO:0003704; ; ; GO:0008270                                                                |
| <b>CG3388</b>  | <b>gsb</b>     | <b>2.16</b> | <b>5.58E-03</b> | specific RNA polymerase II transcription factor activity; ; GO:0003704; ; ; GO:0003704                                                                                                                |
| <b>CG11922</b> | <b>fd96Cb</b>  | <b>2.15</b> | <b>9.71E-03</b> | transcription factor activity; GO:0003700; ; GO:0003700                                                                                                                                               |
| <b>CG11921</b> | <b>fd96Ca</b>  | <b>1.92</b> | <b>1.72E-02</b> | transcription factor activity; GO:0003700; ; GO:0003700                                                                                                                                               |
| <b>CG14933</b> | <b>CG14933</b> | <b>1.80</b> | <b>7.11E-04</b> | /                                                                                                                                                                                                     |
| <b>CG1897</b>  | <b>msh, Dr</b> | <b>1.75</b> | <b>8.12E-03</b> | specific RNA polymerase II transcription factor activity; GO:0003704; ; GO:0003704                                                                                                                    |
| <b>CG9008</b>  | <b>CG9008</b>  | <b>1.63</b> | <b>2.36E-02</b> | isomerase activity; ; GO:0016853 ; EC:5.-.-.-; racemase and epimerase activity; ; GO:0016854 ; EC:5.1.-.-.; ; ; GO:0016853 ; EC:5.-.-.-.; ; ; GO:0016854 ; EC:5.1.-.-.                                |
| <b>CG9747</b>  | <b>CG9747</b>  | <b>1.47</b> | <b>1.06E-03</b> | acyl-CoA delta11-desaturase activity; GO:0017105; ; GO:0017105                                                                                                                                        |
| <b>CG6604</b>  | <b>H15</b>     | <b>1.44</b> | <b>1.63E-02</b> | transcription factor activity; ; GO:0003700; ; ; GO:0003700                                                                                                                                           |
| <b>CG8967</b>  | <b>otk</b>     | <b>1.37</b> | <b>2.82E-03</b> | transmembrane receptor protein tyrosine kinase activity; ; GO:0004714 ; EC:2.7.1.-; receptor activity; ; GO:0004872; ; ; GO:0004872; semaphorin receptor binding; ; GO:0030215; protein-tyrosine      |
| <b>CG14598</b> | <b>CG14598</b> | <b>1.33</b> | <b>7.87E-03</b> | /                                                                                                                                                                                                     |
| <b>CG11121</b> | <b>so</b>      | <b>1.18</b> | <b>9.97E-03</b> | transcription factor activity; ; GO:0003700; RNA polymerase II transcription factor activity; ; GO:0003702; ; ; GO:0003700; ; ; GO:0003702                                                            |
| <b>CG15209</b> | <b>CG15209</b> | <b>1.15</b> | <b>2.63E-02</b> | /                                                                                                                                                                                                     |
| <b>CG9338</b>  | <b>CG9338</b>  | <b>1.12</b> | <b>4.47E-02</b> | /                                                                                                                                                                                                     |
| <b>CG2056</b>  | <b>CG2056</b>  | <b>1.11</b> | <b>2.49E-02</b> | trypsin activity; GO:0004295 ; EC:3.4.21.4; serine-type endopeptidase activity; GO:0004252 ; EC:3.4.21.-; ; GO:0004295 ; EC:3.4.21.4; ; GO:0004252 ; EC:3.4.21.-                                      |
| <b>CG1743</b>  | <b>Gs2</b>     | <b>1.09</b> | <b>4.24E-02</b> | glutamate-ammonia ligase activity; ; GO:0004356 ; EC:6.3.1.2; ; ; GO:0004356 ; EC:6.3.1.2; ; ; GO:0004356 ; EC:6.3.1.2; ; ; GO:0004356 ; EC:6.3.1.2                                                   |
| <b>CG3629</b>  | <b>Dll</b>     | <b>1.04</b> | <b>4.53E-02</b> | specific RNA polymerase II transcription factor activity; ; GO:0003704; ; ; GO:0003704                                                                                                                |
| <b>CG4637</b>  | <b>hh</b>      | <b>1.00</b> | <b>3.45E-03</b> | smoothened binding; GO:0005119; patched binding; GO:0005113; ; GO:0005119; ; GO:0005113; signal transducer activity; GO:0004871; morphogen activity; GO:0016015; cysteine-type endopeptid             |
| <b>CG8964</b>  | <b>CG8964</b>  | <b>0.99</b> | <b>1.28E-02</b> | non-membrane spanning protein tyrosine kinase activity; ; GO:0004715 ; EC:2.7.1.-; receptor activity; ; GO:0004872; transmembrane receptor activity; ; GO:0004888; transmembrane receptor prote       |
| <b>CG9015</b>  | <b>en</b>      | <b>0.99</b> | <b>5.83E-03</b> | transcription regulator activity; ; GO:0030528; transcriptional repressor activity; ; GO:0016564; specific RNA polymerase II transcription factor activity; ; GO:0003704; ; ; GO:0003704; ; ; GO:00   |
| <b>CG6206</b>  | <b>CG6206</b>  | <b>0.99</b> | <b>2.70E-02</b> | hydrolase activity, hydrolyzing N-glycosyl compounds; ; GO:0016799 ; EC:3.2.2.-; ; ; GO:0016799 ; EC:3.2.2.-; ; alpha-mannosidase activity; ; GO:0004559 ; EC:3.2.1.24; ; ; GO:0004559 ; EC:3.2.1.2   |
| <b>CG9653</b>  | <b>brk</b>     | <b>0.96</b> | <b>4.18E-02</b> | RNA polymerase II transcription factor activity; GO:0003702; specific transcriptional repressor activity; GO:0016566; ; GO:0016566; transcriptional repressor activity; GO:0016564; ; GO:             |
| <b>CG8927</b>  | <b>CG8927</b>  | <b>0.91</b> | <b>1.20E-02</b> | /                                                                                                                                                                                                     |
| <b>CG6173</b>  | <b>kal-1</b>   | <b>0.89</b> | <b>3.93E-02</b> | cell adhesion; GO:0007155; transmission of nerve impulse; GO:0019226                                                                                                                                  |
| <b>CG9614</b>  | <b>pip</b>     | <b>0.87</b> | <b>1.13E-02</b> | heparin-sulfate 2-sulfotransferase activity; GO:0004394 ; EC:2.8.2.-; sulfotransferase activity; GO:0008146 ; EC:2.8.2.-; ; GO:0004394 ; EC:2.8.2.-; ; GO:0004394 ; EC:2.8.2.-; ; GO:0008             |

V(wg)

| CG#     | Synonym     | median (log2) | p-value  | Function                                                                                                                                                                                                                                                               |
|---------|-------------|---------------|----------|------------------------------------------------------------------------------------------------------------------------------------------------------------------------------------------------------------------------------------------------------------------------|
| CG4969  | Wnt6        | 2.64          | 1.82E-02 | receptor binding; ; GO:0005102; ; ; GO:0005102; signal transducer activity; ; GO:0004871; ; ; GO:0005102; ; ; GO:0004871                                                                                                                                               |
| CG4889  | wg          | 2.50          | 1.28E-04 | frizzled-2 binding; ; GO:0005110; ; ; GO:0005110; ; ; GO:0005110; receptor binding; ; GO:0005102; Notch binding; ; GO:0005112; signal transducer activity; ; GO:0004871; morphogen activity; ; GO:00160                                                                |
| CG7214  | CG7214      | 2.33          | 1.25E-02 | /                                                                                                                                                                                                                                                                      |
| CG6570  | lbl         | 1.95          | 5.54E-03 | specific RNA polymerase II transcription factor activity; GO:0003704; ; GO:0003704                                                                                                                                                                                     |
| CG10016 | drm         | 1.80          | 2.20E-02 | foregut morphogenesis; ; GO:0007440; hindgut morphogenesis; ; GO:0007442; leg joint morphogenesis (sensu Holometabola); ; GO:0016348                                                                                                                                   |
| CG15786 | CG15786     | 1.72          | 2.93E-02 | /                                                                                                                                                                                                                                                                      |
| CG6936  | mth         | 1.60          | 2.02E-02 | G-protein coupled receptor activity; ; GO:0004930; ; ; GO:0004930; ; ; GO:0004930                                                                                                                                                                                      |
| CG14648 | CG14648     | 1.49          | 1.79E-02 | /                                                                                                                                                                                                                                                                      |
| CG6234  | CG6234      | 1.48          | 3.30E-03 | /                                                                                                                                                                                                                                                                      |
| CG17528 | CG17528     | 1.43          | 2.25E-02 | microtubule binding; ; GO:0008017; ; ; GO:0008017; receptor signaling protein serine/threonine kinase activity; ; GO:0004702; EC:2.7.1.-; ; protein serine/threonine kinase activity; ; GO:0004674                                                                     |
| CG14026 | tkv         | 1.41          | 3.09E-02 | protein kinase activity; ; GO:0004672; EC:2.7.1.37; type I transforming growth factor beta receptor activity; ; GO:0005025; ; ; GO:0005025; ; ; GO:0004672; EC:2.7.1.37; transforming growth fa                                                                        |
| CG10960 | CG10960     | 1.34          | 6.49E-03 | glucose transporter activity; ; GO:0005355; ; ; GO:0005355                                                                                                                                                                                                             |
| CG11107 | CG11107     | 1.23          | 3.78E-02 | RNA helicase activity; ; GO:0003724; EC:2.7.7.-; ; ; GO:0003724; EC:2.7.7.-; ; ; GO:0003724; EC:2.7.7.-; pre-mRNA splicing factor activity; ; GO:0008248; ; ; GO:0008248; ATP-dependent helicase                                                                       |
| CG8798  | CG8798      | 1.21          | 4.86E-02 | endopeptidase La activity; GO:0008846; EC:3.4.21.53; ; GO:0008846; EC:3.4.21.53; ; GO:0008846; EC:3.4.21.53                                                                                                                                                            |
| CG10624 | sinu        | 1.21          | 2.63E-02 | regulation of tracheal tube size; ; GO:0035151; septate junction assembly; ; GO:0019991; tracheal system development (sensu Insecta); ; GO:0007424, nucleic acid binding; ; GO:0003676; ; ; GO:0003676; transcription regulator activity; ; GO:0030528; ; ; GO:0030528 |
| CG17514 | CG17514     | 1.20          | 2.31E-02 | translation activator activity; ; GO:0008494; kinase regulator activity; ; GO:0019207; ; ; GO:0019207; ; ; GO:0008494                                                                                                                                                  |
| CG6959  | CG6959      | 1.15          | 2.30E-02 | /                                                                                                                                                                                                                                                                      |
| CG8280  | Ef1alpha48D | 1.14          | 1.20E-02 | translation elongation factor activity; ; GO:0003746; ; ; GO:0003746; ; ; GO:0003746; translation release factor activity; ; GO:0003747; GTPase activity; ; GO:0003924; ; ; GO:0003746; ; ; GO:0003924;                                                                |
| CG1374  | tsh         | 1.11          | 5.65E-03 | specific RNA polymerase II transcription factor activity; ; GO:0003704; ; ; GO:0003704                                                                                                                                                                                 |
| CG12006 | CG12006     | 1.10          | 3.76E-02 | transferase activity, transferring glycosyl groups; ; GO:0016757; EC:2.4.-.-; ; transferase activity; ; GO:0016740; EC:2.-.-.-; ; ; GO:0016740; EC:2.-.-.-; ; ; GO:0016757; EC:2.4.-.-                                                                                 |
| CG7254  | GlyP        | 1.09          | 3.85E-02 | phosphorylase activity; ; GO:0004645; EC:2.4.1.1; glycogen phosphorylase activity; ; GO:0008184; ; ; GO:0008184; ; ; GO:0008184; ; ; GO:0004645; EC:2.4.1.1                                                                                                            |
| CG2791  | CG2791      | 1.08          | 3.33E-02 | /                                                                                                                                                                                                                                                                      |
| CG6493  | Dcr-2       | 1.07          | 2.41E-02 | double-stranded RNA binding; ; GO:0003725; ; ; GO:0003725; ; ; GO:0003725; helicase activity; ; GO:0004386; ; ; GO:0004386; endonuclease activity; ; GO:0004520; RNA helicase activity; ; GO:0                                                                         |
| CG1902  | CG1902      | 1.05          | 2.85E-02 | /                                                                                                                                                                                                                                                                      |
| CG12567 | CG12567     | 1.01          | 4.52E-02 | thiamin diphosphokinase activity; ; GO:0004788; EC:2.7.6.2; ; ; GO:0004788; EC:2.7.6.2                                                                                                                                                                                 |
| CG6116  | CG6116      | 1.01          | 1.87E-02 | molecular_function unknown; ; GO:0005554; ; ; GO:0005554                                                                                                                                                                                                               |
| CG6530  | mthl3       | 1.00          | 2.11E-02 | G-protein coupled receptor activity; ; GO:0004930; ; ; GO:0004930; ; ; GO:0004930                                                                                                                                                                                      |
| CG2918  | CG2918      | 1.00          | 3.22E-02 | defense response; ; GO:0006952; protein folding; ; GO:0006457; response to stress; ; GO:0006950                                                                                                                                                                        |
| CG9915  | CG9915      | 0.98          | 4.50E-02 | /                                                                                                                                                                                                                                                                      |

|                |                 |             |                 |                                                                                                                                                                                                                               |
|----------------|-----------------|-------------|-----------------|-------------------------------------------------------------------------------------------------------------------------------------------------------------------------------------------------------------------------------|
| <b>CG7962</b>  | <b>CdsA</b>     | <b>0.97</b> | <b>1.59E-02</b> | phosphatidate cytidyltransferase activity; ; GO:0004605 ; EC:2.7.7.41; ; ; GO:0004605 ; EC:2.7.7.41; ; ; GO:0004605 ; EC:2.7.7.41; ; ; GO:0004605 ; EC:2.7.7.41                                                               |
| <b>CG3837</b>  | <b>CG3837</b>   | <b>0.95</b> | <b>6.15E-03</b> | insulin-like growth factor receptor activity; GO:0005010; ; GO:0005010                                                                                                                                                        |
| <b>CG1448</b>  | <b>inx3</b>     | <b>0.95</b> | <b>1.64E-02</b> | innexin channel activity; GO:0015286; ; GO:0015286                                                                                                                                                                            |
| <b>CG9990</b>  | <b>CG9990</b>   | <b>0.95</b> | <b>4.37E-03</b> | ATPase activity, coupled to transmembrane movement of substances; GO:0042626; transporter activity; GO:0005215; ; GO:0042626; ; GO:0005215                                                                                    |
| <b>CG14194</b> | <b>CG14194</b>  | <b>0.94</b> | <b>1.03E-02</b> | /                                                                                                                                                                                                                             |
| <b>CG9977</b>  | <b>CG9977</b>   | <b>0.94</b> | <b>4.38E-02</b> | adenosylhomocysteinase activity; ; GO:0004013 ; EC:3.3.1.1; ; ; GO:0004013 ; EC:3.3.1.1                                                                                                                                       |
| <b>CG12598</b> | <b>Adar</b>     | <b>0.92</b> | <b>3.06E-02</b> | double-stranded RNA binding; ; GO:0003725; ; ; GO:0003725; double-stranded RNA adenosine deaminase activity; ; GO:0003726; ; ; GO:0003726                                                                                     |
| <b>CG13252</b> | <b>CG13252</b>  | <b>0.91</b> | <b>4.40E-02</b> | /                                                                                                                                                                                                                             |
| <b>CG5003</b>  | <b>CG5003</b>   | <b>0.91</b> | <b>4.51E-02</b> | /                                                                                                                                                                                                                             |
| <b>CG7008</b>  | <b>Tudor-SN</b> | <b>0.91</b> | <b>3.59E-02</b> | transcription coactivator activity; ; GO:0003713; ; ; GO:0003713                                                                                                                                                              |
| <b>CG9735</b>  | <b>Aats-trp</b> | <b>0.91</b> | <b>2.97E-02</b> | tryptophan-tRNA ligase activity; GO:0004830 ; EC:6.1.1.2; ; GO:0004830 ; EC:6.1.1.2                                                                                                                                           |
| <b>CG5008</b>  | <b>GNBP3</b>    | <b>0.91</b> | <b>2.91E-02</b> | Gram-negative bacterial binding; ; GO:0008368; pattern recognition receptor activity; ; GO:0008329; ; ; GO:0008329; glucosidase activity; ; GO:0015926 ; EC:3.2.1.-; ; ; GO:0008329; ; ; GO:0008368;                          |
| <b>CG12403</b> | <b>Vha68-1</b>  | <b>0.90</b> | <b>4.63E-02</b> | hydrogen-exporting ATPase activity, phosphorylative mechanism; ; GO:0008553 ; EC:3.6.3.6; ; ; GO:0008553 ; EC:3.6.3.6; ; ; GO:0008553 ; EC:3.6.3.6; ; ; GO:0008553 ; EC:3.6.3.6                                               |
| <b>CG15822</b> | <b>CG15822</b>  | <b>0.89</b> | <b>1.25E-02</b> | /                                                                                                                                                                                                                             |
| <b>CG3584</b>  | <b>qkr58E-3</b> | <b>0.89</b> | <b>2.71E-02</b> | RNA binding; ; GO:0003723; ; ; GO:0003723                                                                                                                                                                                     |
| <b>CG11143</b> | <b>Inos</b>     | <b>0.89</b> | <b>4.81E-02</b> | inositol-3-phosphate synthase activity; ; GO:0004512 ; EC:5.5.1.4; ; ; GO:0004512 ; EC:5.5.1.4; ; ; GO:0004512 ; EC:5.5.1.4; phosphorus-oxygen lyase activity; ; GO:0016849 ; EC:4.6.-.-; ; ; GO:00                           |
| <b>CG4027</b>  | <b>Act5C</b>    | <b>0.88</b> | <b>1.87E-02</b> | structural constituent of cytoskeleton; ; GO:0005200; ; ; GO:0005200                                                                                                                                                          |
| <b>CG9211</b>  | <b>CG9211</b>   | <b>0.88</b> | <b>2.90E-02</b> | cell adhesion; ; GO:0007155; cell communication; ; GO:0007154; cell-cell adhesion; ; GO:0016337; development; ; GO:0007275; ectoderm development; ; GO:0007398; neurogenesis; ; GO:0007399; signal transduction; ; GO:0007165 |
| <b>CG11964</b> | <b>CG11964</b>  | <b>0.87</b> | <b>2.26E-02</b> | /                                                                                                                                                                                                                             |
| <b>CG1906</b>  | <b>CG1906</b>   | <b>0.86</b> | <b>3.91E-02</b> | protein serine/threonine phosphatase activity; GO:0004722; ; GO:0004722; ; GO:0004722                                                                                                                                         |
| <b>CG7070</b>  | <b>PyK</b>      | <b>0.86</b> | <b>3.01E-03</b> | pyruvate kinase activity; GO:0004743 ; EC:2.7.1.40; carbohydrate kinase activity; GO:0019200; ; GO:0019200; ; GO:0004743 ; EC:2.7.1.40; ; GO:0004743 ; EC:2.7.1.40                                                            |
| <b>CG5699</b>  | <b>zormin</b>   | <b>0.86</b> | <b>8.80E-03</b> | zormin, structural constituent of cytoskeleton; ; GO:0005200; ; ; GO:0005200; ; ; GO:0005200                                                                                                                                  |
| <b>CG11228</b> | <b>hpo</b>      | <b>0.86</b> | <b>4.61E-02</b> | protein binding; ; GO:0005515; receptor signaling protein serine/threonine kinase activity; ; GO:0004702 ; EC:2.7.1.-; ; ; GO:0004702 ; EC:2.7.1.-; protein serine/threonine kinase activity; G                               |
| <b>CG4567</b>  | <b>CG4567</b>   | <b>0.85</b> | <b>4.64E-02</b> | translation elongation factor activity; ; GO:0003746; ; ; GO:0003746; ; ; GO:0003746                                                                                                                                          |
