# Supplementary material for: Regulation of cellular plasticity in Drosophila imaginal disc cells by the Polycomb group, trithorax group and lama genes
Source: Oxford University Press journal article supplement (doi:10.1242/dev.01927), 2005-08-02
Supplement: dev01927supptable_4.pdf [file dev01927supptable_4.pdf]

**Table S4****Genes preferentially expressed in regenerating cells**

| CG #    | Synonym     | median (log2) | p-value  | Molecular Function                                                                                                                                                                                                                                                                              |
|---------|-------------|---------------|----------|-------------------------------------------------------------------------------------------------------------------------------------------------------------------------------------------------------------------------------------------------------------------------------------------------|
| CG4250  | CG4250      | -6.03         | 3.00E-04 | /                                                                                                                                                                                                                                                                                               |
| CG13053 | CG13053     | -4.40         | 4.80E-03 | /                                                                                                                                                                                                                                                                                               |
| CG10112 | CG10112     | -4.39         | 6.00E-05 | /                                                                                                                                                                                                                                                                                               |
| CG8846  | Thor, Phas1 | -3.95         | 5.00E-04 | eukaryotic initiation factor 4E binding; ; GO:0008190; ; ; GO:0008190; ; ; GO:0008190; ; ; GO:0008190                                                                                                                                                                                           |
| CG15212 | CG15212     | -3.77         | 1.50E-03 | /                                                                                                                                                                                                                                                                                               |
| CG1148  | Osi2        | -3.30         | 6.90E-03 | /                                                                                                                                                                                                                                                                                               |
| CG9812  | CG9812      | -3.08         | 1.00E-04 | /                                                                                                                                                                                                                                                                                               |
| CG15532 | hdc         | -2.87         | 1.39E-02 | cell differentiation; GO:0030154; negative regulation of terminal cell fate specification; GO:0035155; terminal branching of trachea, cytoplasmic projection extension (sensu Insecta); GO:0007430; tracheal branch fusion; GO:0035147; tracheal system development (sensu Insecta); GO:0007424 |
| CG10131 | CG10131     | -2.72         | 2.48E-02 | structural molecule activity; ; GO:0005198; oxidoreductase activity; ; GO:0016491 ; EC:1.-.-.- ; ; GO:0005198 ; ; GO:0016491 ; EC:1.-.-.-                                                                                                                                                       |
| CG3752  | CG3752      | -2.62         | 8.70E-03 | aldehyde dehydrogenase (NAD) activity; ; GO:0004029 ; EC:1.2.1.3; ; ; GO:0004029 ; EC:1.2.1.3; ; ; GO:0004029 ; EC:1.2.1.3                                                                                                                                                                      |
| CG1803  | regucalcin  | -2.59         | 6.00E-03 | anterior/posterior axis specification; ; GO:0009948; calcium-mediated signaling; ; GO:0019722,                                                                                                                                                                                                  |
| CG3699  | CG3699      | -2.41         | 8.80E-03 | oxidoreductase activity, acting on CH-OH group of donors; ; GO:0016614 ; EC:1.1.-.-.- ; ; GO:0016614 ; EC:1.1.-.-.-                                                                                                                                                                             |
| CG5575  | ken         | -2.37         | 2.00E-03 | nucleic acid binding; ; GO:0003676; transcription factor activity; ; GO:0003700; ; ; GO:0003676; ; ; GO:0003700; protein binding; ; GO:0005515; ; ; GO:0005515                                                                                                                                  |
| CG4822  | CG4822      | -2.26         | 3.36E-02 | anion channel activity; ; GO:0005253; ATPase activity, coupled to transmembrane movement of substances; ; GO:0042626; ; ; GO:0005253; transporter activity; ; GO:0005215; ; ; GO:0042626; ; ; GO:0005                                                                                           |
| CG4145  | Cg25C       | -2.24         | 1.61E-02 | structural molecule activity; ; GO:0005198; extracellular matrix structural constituent; ; GO:0005201; ; ; GO:0005198; ; ; GO:0005201                                                                                                                                                           |
| CG1102  | CG1102      | -2.12         | 1.77E-02 | trypsin activity; GO:0004295 ; EC:3.4.21.4; monophenol monooxygenase activator activity; GO:0008439; serine-type endopeptidase activity; GO:0004252 ; EC:3.4.21.-; ; GO:0004252 ; EC:3.4.                                                                                                       |
| CG2150  | CG2150      | -2.01         | 5.00E-02 | /                                                                                                                                                                                                                                                                                               |
| CG1762  | betaInt-nu  | -1.94         | 3.97E-02 | receptor activity; ; GO:0004872; ; ; GO:0004872; cell adhesion molecule binding; ; GO:0050839; ; ; GO:0050839; ; ; GO:0004872; ; ; GO:0050839                                                                                                                                                   |
| CG8788  | CG8788      | -1.92         | 9.70E-03 | /                                                                                                                                                                                                                                                                                               |
| ND3     | ND3         | -1.89         | 3.42E-02 | NADH dehydrogenase subunit 3, mitochondrial NADH-ubiquinone oxidoreductase chain 3 , abbreviated as mt:ND3                                                                                                                                                                                      |
| CG6899  | Ptp4E       | -1.81         | 2.40E-03 | protein tyrosine phosphatase activity; ; GO:0004725 ; EC:3.1.3.48; transmembrane receptor protein tyrosine phosphatase activity; ; GO:0005001; ; ; GO:0004725 ; EC:3.1.3.48; ; ; GO:0005001                                                                                                     |
| CG17245 | plexB       | -1.81         | 4.00E-04 | semaphorin receptor activity; ; GO:0017154; transmembrane receptor protein tyrosine kinase activity; ; GO:0004714 ; EC:2.7.1.-; ; ; GO:0004714 ; EC:2.7.1.-; ; ; GO:0017154                                                                                                                     |
| CG11784 | CG11784     | -1.79         | 2.60E-03 | glutathione transferase activity; ; GO:0004364 ; EC:2.5.1.18; ; ; GO:0004364 ;                                                                                                                                                                                                                  |

|                |                                       |              |                 |                                                                                                                                                                                                     |
|----------------|---------------------------------------|--------------|-----------------|-----------------------------------------------------------------------------------------------------------------------------------------------------------------------------------------------------|
|                |                                       |              |                 | EC:2.5.1.18                                                                                                                                                                                         |
| <b>CG1368</b>  | <b>CG1368</b>                         | <b>-1.78</b> | <b>4.10E-03</b> | structural constituent of chorion (sensu Insecta); ; GO:0005213; ; ; GO:0005213                                                                                                                     |
| <b>CG17299</b> | <b>SNF4Agamma</b>                     | <b>-1.77</b> | <b>1.28E-02</b> | receptor signaling protein serine/threonine kinase activity; GO:0004702 ; EC:2.7.1.-; protein serine/threonine kinase activity; GO:0004674; ; GO:0004674; ; GO:0004702 ; EC:2.7.1.-; AMP-           |
| <b>CG4686</b>  | <b>CG4686</b>                         | <b>-1.75</b> | <b>2.50E-03</b> | /                                                                                                                                                                                                   |
| <b>CG10211</b> | <b>CG10211</b>                        | <b>-1.72</b> | <b>1.09E-02</b> | peroxidase activity; ; GO:0004601 ; EC:1.11.1.7; ; ; GO:0004601 ; EC:1.11.1.7                                                                                                                       |
| <b>CG8245</b>  | <b>CG8245</b>                         | <b>-1.71</b> | <b>1.27E-02</b> | /                                                                                                                                                                                                   |
| <b>CG4807</b>  | <b>ab, abrupt</b>                     | <b>-1.70</b> | <b>3.60E-03</b> | specific RNA polymerase II transcription factor activity; ; GO:0003704; ; ; GO:0003704                                                                                                              |
| <b>CG9358</b>  | <b>Phk-3</b>                          | <b>-1.70</b> | <b>2.19E-02</b> | diacylglycerol binding; ; GO:0019992; ; ; GO:0019992; protein serine/threonine kinase activity; ; GO:0004674; ; ; GO:0004674; protein kinase activity; ; GO:0004672 ; EC:2.7.1.37; carrier activity |
| <b>CG8066</b>  | <b>CG8066</b>                         | <b>-1.68</b> | <b>2.50E-02</b> | cysteine protease inhibitor activity; GO:0004869; ; GO:0004869                                                                                                                                      |
| <b>CG3629</b>  | <b>DII</b>                            | <b>-1.67</b> | <b>7.60E-03</b> | specific RNA polymerase II transcription factor activity; ; GO:0003704; ; ; GO:0003704                                                                                                              |
| <b>CG8727</b>  | <b>cyc</b>                            | <b>-1.65</b> | <b>3.45E-02</b> | specific RNA polymerase II transcription factor activity; GO:0003704; RNA polymerase II transcription factor activity; GO:0003702; ; GO:0003702; ; GO:0003704                                       |
| <b>CG12822</b> | <b>CG12822</b>                        | <b>-1.64</b> | <b>1.32E-02</b> | /                                                                                                                                                                                                   |
| <b>CG9689</b>  | <b>CG9689</b>                         | <b>-1.61</b> | <b>8.20E-03</b> | /                                                                                                                                                                                                   |
| <b>CG18507</b> | <b>CG18507</b>                        | <b>-1.58</b> | <b>1.05E-02</b> | /                                                                                                                                                                                                   |
| <b>CG5677</b>  | <b>CG5677</b>                         | <b>-1.56</b> | <b>2.64E-02</b> | signal peptidase activity; GO:0009003; ; GO:0009003; ; GO:0009003                                                                                                                                   |
| <b>CG7267</b>  | <b>CG7267</b>                         | <b>-1.55</b> | <b>1.05E-02</b> | /                                                                                                                                                                                                   |
| <b>CG7724</b>  | <b>CG7724</b>                         | <b>-1.55</b> | <b>2.45E-02</b> | oxidoreductase activity, acting on CH-OH group of donors; ; GO:0016614 ; EC:1.1.1.-; ; ; GO:0016614 ; EC:1.1.1.-                                                                                    |
| <b>CG15611</b> | <b>CG15611</b>                        | <b>-1.52</b> | <b>9.60E-03</b> | /                                                                                                                                                                                                   |
| <b>CG6191</b>  | <b>CG6191</b>                         | <b>-1.52</b> | <b>1.96E-02</b> | /                                                                                                                                                                                                   |
| <b>CG5518</b>  | <b>sda</b>                            | <b>-1.52</b> | <b>3.00E-04</b> | membrane alanine aminopeptidase activity; GO:0004179 ; EC:3.4.11.2; ; GO:0004179 ; EC:3.4.11.2                                                                                                      |
| <b>CG3831</b>  | <b>CG3831</b>                         | <b>-1.49</b> | <b>2.13E-02</b> | /                                                                                                                                                                                                   |
| <b>CG6357</b>  | <b>CG6357</b>                         | <b>-1.47</b> | <b>1.20E-03</b> | cathepsin L activity; ; GO:0004217 ; EC:3.4.22.15; ; ; GO:0004217 ; EC:3.4.22.15                                                                                                                    |
| <b>CG6247</b>  | <b>CG32549 = new ID in v4, CG6247</b> | <b>-1.47</b> | <b>1.42E-02</b> | CG32549, 5'-nucleotidase activity; GO:0008253 ; EC:3.1.3.5; ; GO:0008253 ; EC:3.1.3.5                                                                                                               |
| <b>CG2062</b>  | <b>Cyp4e1</b>                         | <b>-1.44</b> | <b>1.71E-02</b> | electron transporter activity; ; GO:0005489; ; ; GO:0005489; oxidoreductase activity; ; GO:0016491 ; EC:1.-.-.-; ; ; GO:0016491 ; EC:1.-.-.-; ; ; GO:0005489                                        |
| <b>CG4778</b>  | <b>CG4778</b>                         | <b>-1.43</b> | <b>8.30E-03</b> | structural constituent of peritrophic membrane (sensu Insecta); ; GO:0016490; ; ; GO:0016490                                                                                                        |
| <b>CG4382</b>  | <b>CG4382</b>                         | <b>-1.42</b> | <b>9.90E-03</b> | carboxylesterase activity; ; GO:0004091 ; EC:3.1.1.1; ; ; GO:0004091 ; EC:3.1.1.1                                                                                                                   |
| <b>CG8790</b>  | <b>CG8790</b>                         | <b>-1.42</b> | <b>4.40E-03</b> | carrier activity; GO:0005386; dicarboxylic acid transporter activity; GO:0005310; ; GO:0005386; ; GO:0005310                                                                                        |
| <b>CG13044</b> | <b>CG13044</b>                        | <b>-1.41</b> | <b>4.00E-04</b> | /                                                                                                                                                                                                   |
| <b>CG3704</b>  | <b>CG3704</b>                         | <b>-1.41</b> | <b>2.48E-02</b> | purine nucleotide binding; ; GO:0017076; ; ; GO:0017076                                                                                                                                             |
| <b>CG10126</b> | <b>CG10126</b>                        | <b>-1.40</b> | <b>2.61E-02</b> | calcium ion binding; GO:0005509; ; GO:0005509                                                                                                                                                       |
| <b>CG10916</b> | <b>CG10916</b>                        | <b>-1.39</b> | <b>4.90E-03</b> | /                                                                                                                                                                                                   |

|         |                                 |       |          |                                                                                                                                                                                                                |
|---------|---------------------------------|-------|----------|----------------------------------------------------------------------------------------------------------------------------------------------------------------------------------------------------------------|
| CG13430 | CG13430                         | -1.38 | 1.81E-02 | trypsin activity; ; GO:0004295 ; EC:3.4.21.4; ; ; GO:0004295 ; EC:3.4.21.4; ; ; GO:0004295 ; EC:3.4.21.4                                                                                                       |
| CG9338  | CG9338                          | -1.36 | 4.30E-02 | /                                                                                                                                                                                                              |
| CG17035 | GXIVsPLA2                       | -1.35 | 4.90E-02 | phospholipase A2 activity; ; GO:0004623 ; EC:3.1.1.4; ; ; GO:0004623 ; EC:3.1.1.4                                                                                                                              |
| CG7860  | CG7860                          | -1.34 | 9.40E-03 | asparaginase activity; ; GO:0004067 ; EC:3.5.1.1; ; ; GO:0004067 ; EC:3.5.1.1                                                                                                                                  |
| CG14812 | CG14812                         | -1.33 | 1.97E-02 | /                                                                                                                                                                                                              |
| CG6667  | dl                              | -1.32 | 2.85E-02 | DNA binding; ; GO:0003677; ; ; GO:0003677; transcription factor activity; ; GO:0003700; transcriptional activator activity; ; GO:0016563; RNA polymerase II transcription factor activity; ; GO:000            |
| CG12164 | CG12164                         | -1.31 | 4.16E-02 | /                                                                                                                                                                                                              |
| CG1572  | CG1572                          | -1.29 | 2.25E-02 | /                                                                                                                                                                                                              |
| CG11143 | Inos                            | -1.27 | 4.60E-03 | inositol-3-phosphate synthase activity; ; GO:0004512 ; EC:5.5.1.4; ; ; GO:0004512 ; EC:5.5.1.4; ; phosphorus-oxygen lyase activity; ; GO:0016849 ; EC:4.6.-.-; ; ; GO:00                                       |
| CG4592  | CG4592                          | -1.26 | 2.44E-02 | hydro-lyase activity; ; GO:0016836 ; EC:4.2.1.-; ; ; GO:0016836 ; EC:4.2.1.-; dodecenoyl-CoA delta-isomerase activity; ; GO:0004165 ; EC:5.3.3.8; ; ; GO:0004165 ; EC:5.3.3.8                                  |
| CG9134  | CG9134                          | -1.25 | 1.52E-02 | sugar binding; ; GO:0005529; ; ; GO:0005529                                                                                                                                                                    |
| CG10119 | LamC                            | -1.24 | 4.87E-02 | structural constituent of cytoskeleton; ; GO:0005200; ; ; GO:0005200                                                                                                                                           |
| CG8289  | CG8289                          | -1.24 | 1.90E-03 | /                                                                                                                                                                                                              |
| CG3712  | mRpL33                          | -1.23 | 4.54E-02 | structural constituent of ribosome; ; GO:0003735; ; ; GO:0003735                                                                                                                                               |
| CG4380  | usp                             | -1.19 | 4.10E-02 | DNA binding; ; GO:0003677; juvenile hormone binding; ; GO:0005500; ; ; GO:0003677; ecdysteroid hormone receptor activity; ; GO:0004884; ; ; GO:0004884; ligand-dependent nuclear receptor activity;            |
| CG4096  | CG4096                          | -1.18 | 3.12E-02 | metalloendopeptidase activity; ; GO:0004222 ; EC:3.4.24.-; ; ; GO:0004222 ; EC:3.4.24.-                                                                                                                        |
| CG10071 | RpL29                           | -1.18 | 2.99E-02 | structural constituent of ribosome; ; GO:0003735; ; ; GO:0003735; ; ; GO:0003735; ; ; GO:0003735                                                                                                               |
| CG12023 | GV1                             | -1.18 | 2.88E-02 | /                                                                                                                                                                                                              |
| CG1516  | CG1516                          | -1.18 | 2.33E-02 | pyruvate carboxylase activity; ; GO:0004736 ; EC:6.4.1.1; ; ; GO:0004736 ; EC:6.4.1.1; ; ; GO:0004736 ; EC:6.4.1.1                                                                                             |
| CG11077 | CG11077                         | -1.16 | 1.20E-03 | development; ; GO:0007275                                                                                                                                                                                      |
| CG7224  | CG7224                          | -1.16 | 4.58E-02 | /                                                                                                                                                                                                              |
| ND4     | ND4                             | -1.14 | 3.60E-02 | NADH dehydrogenase subunit 4, mitochondrial NADH-ubiquinone oxidoreductase chain 4 , abbreviated as mt:ND4                                                                                                     |
| COX3    | COX3                            | -1.14 | 4.90E-02 | mitochondrial Cytochrome c oxidase subunit III , abbreviated as mt:CoIII                                                                                                                                       |
| CG7291  | NPC2                            | -1.12 | 4.50E-02 | receptor binding; ; GO:0005102; ; ; GO:0005102                                                                                                                                                                 |
| CG1402  | CG1402                          | -1.12 | 1.25E-02 | carbonate dehydratase activity; GO:0004089 ; EC:4.2.1.1; ; ; GO:0004089 ; EC:4.2.1.1                                                                                                                           |
| CG9535  | CG9535                          | -1.11 | 4.58E-02 | UDP-N-acetylglucosamine diphosphorylase activity; ; GO:0003977 ; EC:2.7.7.23; ; ; GO:0003977 ; EC:2.7.7.23                                                                                                     |
| CG13660 | CG31370 = new ID in v4, CG13660 | -1.10 | 1.66E-02 | CG31370                                                                                                                                                                                                        |
| CG11207 | feo                             | -1.10 | 3.53E-02 | receptor binding; GO:0005102; ; ; GO:0005102                                                                                                                                                                   |
| CG9704  | Nrt                             | -1.07 | 2.10E-03 | cell adhesion; ; GO:0007155; ectoderm development; ; GO:0007398; neurogenesis; ; GO:0007399, amine receptor activity; ; GO:0008227; octopamine receptor activity; ; GO:0004989; ; ; GO:0008227; ; ; GO:0004989 |
| CG12340 | CG12340                         | -1.07 | 4.89E-02 | /                                                                                                                                                                                                              |
| CG11141 | CG11141                         | -1.06 | 1.15E-02 | /                                                                                                                                                                                                              |

|                |                                 |              |                 |                                                                                                                                                                                                                                           |
|----------------|---------------------------------|--------------|-----------------|-------------------------------------------------------------------------------------------------------------------------------------------------------------------------------------------------------------------------------------------|
| <b>CG17033</b> | <b>CG17033</b>                  | <b>-1.06</b> | <b>6.40E-03</b> | /                                                                                                                                                                                                                                         |
| <b>CG6999</b>  | <b>CG6999</b>                   | <b>-1.06</b> | <b>4.09E-02</b> | /                                                                                                                                                                                                                                         |
| <b>CG1827</b>  | <b>CG1827</b>                   | <b>-1.05</b> | <b>3.70E-03</b> | N4-(beta-N-acetylglucosaminy)-L-asparaginase activity; ; GO:0003948 ; EC:3.5.1.26; ; ; GO:0003948 ; EC:3.5.1.26                                                                                                                           |
| <b>CG11562</b> | <b>CG11562</b>                  | <b>-1.04</b> | <b>1.23E-02</b> | /                                                                                                                                                                                                                                         |
| <b>CG4860</b>  | <b>CG4860</b>                   | <b>-1.04</b> | <b>1.00E-03</b> | acyl-CoA dehydrogenase activity; GO:0003995 ; EC:1.3.99.3; ; GO:0003995 ; EC:1.3.99.3                                                                                                                                                     |
| <b>CG12238</b> | <b>l(1)G0084</b>                | <b>-1.03</b> | <b>3.00E-02</b> | /                                                                                                                                                                                                                                         |
| <b>CG3937</b>  | <b>cher</b>                     | <b>-1.02</b> | <b>6.50E-03</b> | actin binding; GO:0003779; ; GO:0003779; ; GO:0003779; structural constituent of cytoskeleton; GO:0005200; ; GO:0005200; ; GO:0003779                                                                                                     |
| <b>CG18657</b> | <b>NetA</b>                     | <b>-1.02</b> | <b>4.66E-02</b> | structural molecule activity; ; GO:0005198; ; ; GO:0005198                                                                                                                                                                                |
| <b>CG6575</b>  | <b>glec</b>                     | <b>-1.02</b> | <b>1.50E-03</b> | carbohydrate binding; GO:0030246; ; GO:0030246; ; GO:0030246                                                                                                                                                                              |
| <b>CG6073</b>  | <b>CG6073</b>                   | <b>-1.01</b> | <b>1.75E-02</b> | /                                                                                                                                                                                                                                         |
| <b>CG8980</b>  | <b>NiPp1</b>                    | <b>-1.00</b> | <b>4.69E-02</b> | RNA binding; ; GO:0003723; ; ; GO:0003723; protein phosphatase inhibitor activity; ; GO:0004864; ; ; GO:0004864; ; ; GO:0004864; type 1 serine/threonine specific protein phosphatase inhibitor act                                       |
| <b>CG15802</b> | <b>not found in v4, CG15802</b> | <b>-1.00</b> | <b>4.60E-03</b> | RNA polymerase II transcription factor, ; GO:0003702                                                                                                                                                                                      |
| <b>CG5753</b>  | <b>stau</b>                     | <b>-0.99</b> | <b>4.20E-03</b> | RNA binding; ; GO:0003723; double-stranded RNA binding; ; GO:0003725; ; ; GO:0003723; microtubule binding; ; GO:0008017; ; ; GO:0008017; ; ; GO:0003725; ; ; GO:0008017; ; ; GO:0003725; mRNA 3'-UTR bind                                 |
| <b>CG5571</b>  | <b>CG5571</b>                   | <b>-0.99</b> | <b>6.10E-03</b> | /                                                                                                                                                                                                                                         |
| <b>CG17059</b> | <b>CG17059</b>                  | <b>-0.99</b> | <b>1.09E-02</b> | /                                                                                                                                                                                                                                         |
| <b>CG4260</b>  | <b>alpha-Adaptin</b>            | <b>-0.99</b> | <b>4.70E-03</b> | asymmetric cytokinesis; ; GO:0008356; neurotransmitter secretion; ; GO:0007269; synaptic vesicle coating; ; GO:0016183; synaptic vesicle transport; ; GO:0048489; vesicle coating; ; GO:0006901; vesicle-mediated transport; ; GO:0016192 |
| <b>CG12874</b> | <b>CG12874</b>                  | <b>-0.99</b> | <b>3.69E-02</b> | /                                                                                                                                                                                                                                         |
| <b>CG6695</b>  | <b>CG6695</b>                   | <b>-0.98</b> | <b>1.20E-03</b> | RNA binding; GO:0003723; ; GO:0003723                                                                                                                                                                                                     |
| <b>CG5887</b>  | <b>desat1</b>                   | <b>-0.98</b> | <b>3.75E-02</b> | stearoyl-CoA 9-desaturase activity; GO:0004768 ; EC:1.14.19.1; ; GO:0004768 ; EC:1.14.19.1; ; GO:0004768 ; EC:1.14.19.1                                                                                                                   |
| <b>CG11025</b> | <b>isopeptidase-T-3</b>         | <b>-0.97</b> | <b>1.69E-02</b> | ubiquitin thiolesterase activity; ; GO:0004221 ; EC:3.1.2.15; ; ; GO:0004221 ; EC:3.1.2.15                                                                                                                                                |
| <b>CG8430</b>  | <b>Got1</b>                     | <b>-0.96</b> | <b>1.87E-02</b> | aspartate transaminase activity; ; GO:0004069 ; EC:2.6.1.1; ; ; GO:0004069 ; EC:2.6.1.1; ; ; GO:0004069 ; EC:2.6.1.1; ; ; GO:0004069 ; EC:2.6.1.1                                                                                         |
| <b>CG12840</b> | <b>Tsp42E1</b>                  | <b>-0.96</b> | <b>3.80E-02</b> | receptor signaling protein activity; ; GO:0005057; ; ; GO:0005057                                                                                                                                                                         |
| <b>CG10863</b> | <b>CG10863</b>                  | <b>-0.96</b> | <b>2.75E-02</b> | aldehyde reductase activity; ; GO:0004032 ; EC:1.1.1.21; ; ; GO:0004032 ; EC:1.1.1.21                                                                                                                                                     |
| <b>CG6528</b>  | <b>not found in v4, CG6528</b>  | <b>-0.95</b> | <b>6.00E-04</b> | #N/A                                                                                                                                                                                                                                      |
| <b>CG3523</b>  | <b>CG3523</b>                   | <b>-0.95</b> | <b>4.83E-02</b> | fatty-acid synthase activity; ; GO:0004312 ; EC:2.3.1.85; ; ; GO:0004312 ; EC:2.3.1.85                                                                                                                                                    |
| <b>CG10800</b> | <b>Rca1</b>                     | <b>-0.94</b> | <b>7.20E-03</b> | eye-antennal disc metamorphosis; ; GO:0007455; regulation of mitosis; ; GO:0007088, structural constituent of cytoskeleton; ; GO:0005200; ; ; GO:0005200                                                                                  |
| <b>CG4698</b>  | <b>Wnt4</b>                     | <b>-0.94</b> | <b>8.30E-03</b> | receptor binding; ; GO:0005102; ; ; GO:0005102; signal transducer activity; ; GO:0004871; ; ; GO:0004871; ; ; GO:0005102; ; ; GO:0004871                                                                                                  |
| <b>CG4118</b>  | <b>nxf2</b>                     | <b>-0.93</b> | <b>1.58E-02</b> | mRNA-nucleus export; ; GO:0006406, transporter activity; ; GO:0005215; ; ; GO:0005215; ; ; GO:0005215                                                                                                                                     |
| <b>CG6117</b>  | <b>Pka-C3</b>                   | <b>-0.93</b> | <b>1.36E-02</b> | receptor signaling protein serine/threonine kinase activity; ; GO:0004702 ; EC:2.7.1.-; ; protein serine/threonine kinase activity; ; GO:0004674; cAMP-                                                                                   |

|                |                |              |                 |                                                                                                                                                                                                                                                                                                                                                                                                                                                                          |
|----------------|----------------|--------------|-----------------|--------------------------------------------------------------------------------------------------------------------------------------------------------------------------------------------------------------------------------------------------------------------------------------------------------------------------------------------------------------------------------------------------------------------------------------------------------------------------|
|                |                |              |                 | dependent protein kinase activity; ; GO:00                                                                                                                                                                                                                                                                                                                                                                                                                               |
| <b>CG6673</b>  | <b>CG6673</b>  | <b>-0.93</b> | <b>2.24E-02</b> | glutathione transferase activity; ; GO:0004364 ; EC:2.5.1.18; ; ; GO:0004364 ; EC:2.5.1.18                                                                                                                                                                                                                                                                                                                                                                               |
| <b>CG6494</b>  | <b>h</b>       | <b>-0.93</b> | <b>2.93E-02</b> | specific transcriptional repressor activity; ; GO:0016566; general transcriptional repressor activity; ; GO:0016565; specific RNA polymerase II transcription factor activity; ; GO:0003704; ;                                                                                                                                                                                                                                                                           |
| <b>CG2948</b>  | <b>rev7</b>    | <b>-0.91</b> | <b>2.19E-02</b> | ephrin receptor binding; GO:0046875; ; GO:0046875                                                                                                                                                                                                                                                                                                                                                                                                                        |
| <b>CG12299</b> | <b>CG12299</b> | <b>-0.91</b> | <b>1.20E-03</b> | transcription regulator activity; ; GO:0030528; ; ; GO:0030528                                                                                                                                                                                                                                                                                                                                                                                                           |
| <b>CG5576</b>  | <b>imd</b>     | <b>-0.91</b> | <b>2.42E-02</b> | antibacterial humoral response (sensu Protostomia); ; GO:0006961; antibacterial polypeptide induction; ; GO:0006963; antimicrobial humoral response (sensu Protostomia); ; GO:0006960; defense response; ; GO:0006952; defense response to Gram-negative bacteria; ; GO:0050829; defense response to bacteria; ; GO:0042742; humoral immune response; ; GO:0006959; immune response; ; GO:0006955; response to bacteria; ; GO:0009617; signal transduction; ; GO:0007165 |
| <b>CG9914</b>  | <b>CG9914</b>  | <b>-0.90</b> | <b>4.18E-02</b> | structural molecule activity; ; GO:0005198; oxidoreductase activity; ; GO:0016491 ; EC:1.-.-.-; ; ; GO:0005198; ; ; GO:0016491 ; EC:1.-.-.-                                                                                                                                                                                                                                                                                                                              |
| <b>CG6454</b>  | <b>CG6454</b>  | <b>-0.90</b> | <b>4.91E-02</b> | /                                                                                                                                                                                                                                                                                                                                                                                                                                                                        |
| <b>CG1618</b>  | <b>comt</b>    | <b>-0.89</b> | <b>8.90E-03</b> | ATPase activity; ; GO:0016887; ; ; GO:0016887                                                                                                                                                                                                                                                                                                                                                                                                                            |
| <b>CG3359</b>  | <b>mfas</b>    | <b>-0.89</b> | <b>1.10E-03</b> | axonogenesis; GO:0007409; cell-cell adhesion; GO:0016337; ectoderm development; GO:0007398; signal transduction; GO:0007165                                                                                                                                                                                                                                                                                                                                              |
| <b>CG17725</b> | <b>Pepck</b>   | <b>-0.89</b> | <b>1.65E-02</b> | phosphoenolpyruvate carboxykinase (GTP) activity; ; GO:0004613 ; EC:4.1.1.32; ; ; GO:0004613 ; EC:4.1.1.32; ; ; GO:0004613 ; EC:4.1.1.32                                                                                                                                                                                                                                                                                                                                 |
| <b>CG17967</b> | <b>DebA</b>    | <b>-0.88</b> | <b>1.37E-02</b> | /                                                                                                                                                                                                                                                                                                                                                                                                                                                                        |
| <b>CG18343</b> | <b>CG18343</b> | <b>-0.88</b> | <b>4.40E-03</b> | /                                                                                                                                                                                                                                                                                                                                                                                                                                                                        |
| <b>CG4210</b>  | <b>CG4210</b>  | <b>-0.87</b> | <b>1.29E-02</b> | /                                                                                                                                                                                                                                                                                                                                                                                                                                                                        |
| <b>CG9438</b>  | <b>Cyp6a2</b>  | <b>-0.87</b> | <b>1.59E-02</b> | electron transporter activity; ; GO:0005489; ; ; GO:0005489; oxidoreductase activity; ; GO:0016491 ; EC:1.-.-.-; ; ; GO:0016491 ; EC:1.-.-.-; ; ; GO:0005489                                                                                                                                                                                                                                                                                                             |
| <b>CG9091</b>  | <b>RpL37a</b>  | <b>-0.87</b> | <b>2.80E-02</b> | nucleic acid binding; ; GO:0003676; structural constituent of ribosome; ; GO:0003735; ; ; GO:0003735; ; ; GO:0003676; ; ; GO:0003735                                                                                                                                                                                                                                                                                                                                     |
| <b>CG5025</b>  | <b>Sps2</b>    | <b>-0.85</b> | <b>4.96E-02</b> | selenide, water dikinase activity; ; GO:0004756 ; EC:2.7.9.3; ; ; ; GO:0004756 ; EC:2.7.9.3; ; ; GO:0004756 ; EC:2.7.9.3; purine nucleotide binding; ; GO:0017076; ; ; GO:0017076; ; ; GO:0004756 ; EC:                                                                                                                                                                                                                                                                  |
| <b>CG1093</b>  | <b>plx</b>     | <b>-0.85</b> | <b>4.28E-02</b> | small GTPase regulatory/interacting protein activity; GO:0005083; ; GO:0005083                                                                                                                                                                                                                                                                                                                                                                                           |
