# Supplementary material for: Regulation of cellular plasticity in Drosophila imaginal disc cells by the Polycomb group, trithorax group and lama genes
Source: Oxford University Press journal article supplement (doi:10.1242/dev.01927), 2005-08-02
Supplement: dev01927supptable_5.pdf [file dev01927supptable_5.pdf]

**Table S5. Genes preferentially expressed in TD cells**

**Overlap of TD genes with other lists**

| TD & D(wg) | TD & D(wt)  | TD & REG | TD & wing |
|------------|-------------|----------|-----------|
| CG14191    | CG4766      | CG10863  | CG10570   |
| CG15629    | CG6906      | CG12840  | CG1698    |
| CG6906     | CG15611     | CG15611  | CG1794    |
| CG7539     | CG17914     | CG1572   | CG1897    |
|            | CG1698      | CG3359   | CG3830    |
|            | CG4914      | CG5518   | CG4319    |
|            | CG9885, dpp |          | CG4746    |
|            | CG4746      |          | CG4766    |
|            | CG12840     |          | CG4914    |
|            | CG6868      |          | CG5518    |
|            | CG7722      |          | CG6044    |
|            |             |          | CG7539    |
|            |             |          | CG8404    |
| TD & V(wg) | TD & V(wt)  |          | CG9023    |
| CG6530     | CG1897      |          | CG9307    |
| CG2918     |             |          |           |
| CG4027     |             |          |           |
| CG4567     |             |          |           |

**Genes enriched in TD cells**

confidence level >95%, median >0.85 (log2)

| CG #    | Synonym      | Median (log2) | p-value  | Function                                                                                                                                                                                                                                                                                                                                                                                                                                                                                                                                                                                                |
|---------|--------------|---------------|----------|---------------------------------------------------------------------------------------------------------------------------------------------------------------------------------------------------------------------------------------------------------------------------------------------------------------------------------------------------------------------------------------------------------------------------------------------------------------------------------------------------------------------------------------------------------------------------------------------------------|
| CG14059 | CG14059      | -4.74         | 2.01E-04 | JAK-STAT cascade; GO:0007259; blastoderm segmentation; GO:0007350; border cell migration (sensu Insecta); GO:0007298; defense response; GO:0006952; embryonic development (sensu Insecta); GO:0001700; foregut morphogenesis; GO:0007440; germ-line stem cell division; GO:0042078; hindgut morphogenesis; GO:0007442; ovarian follicle cell development (sensu Insecta); GO:0030707; primary sex determination; GO:0007538; sex determination; GO:0007530; sex determination, establishment of X:A ratio; GO:0007540; somatic stem cell division; GO:0048103; stem cell division; GO:0017145           |
| CG5993  | upd, os      | -3.62         | 1.36E-04 | microtubule-based movement; GO:0007018; wing margin morphogenesis; GO:0008587; wing morphogenesis; GO:0007476                                                                                                                                                                                                                                                                                                                                                                                                                                                                                           |
| CG3830  | vg           | -3.33         | 4.46E-04 | electron transport; GO:0006118; steroid biosynthesis; GO:0006694                                                                                                                                                                                                                                                                                                                                                                                                                                                                                                                                        |
| CG6816  | Cyp18a1      | -3.24         | 5.53E-03 | amino acid metabolism; GO:0006520; amino acid transport; GO:0006865; cation transport; GO:0006812; extracellular transport; GO:0006858; neurotransmitter transport; GO:0006836                                                                                                                                                                                                                                                                                                                                                                                                                          |
| CG15279 | CG15279      | -2.89         | 5.43E-04 |                                                                                                                                                                                                                                                                                                                                                                                                                                                                                                                                                                                                         |
| CG4746  | mab-2        | -2.87         | 1.67E-03 |                                                                                                                                                                                                                                                                                                                                                                                                                                                                                                                                                                                                         |
| CG30445 | CG3686       | -2.83         | 2.41E-04 | amino acid metabolism; GO:0006520; transmission of nerve impulse; GO:0019226                                                                                                                                                                                                                                                                                                                                                                                                                                                                                                                            |
| CG8394  | CG8394       | -2.59         | 8.17E-05 | amino acid metabolism; GO:0006520; amino acid transport; GO:0006865                                                                                                                                                                                                                                                                                                                                                                                                                                                                                                                                     |
| CG2198  | Ama          | -2.38         | 1.05E-06 | cell adhesion; GO:0007155; cell-cell adhesion; GO:0016337; signal transduction; GO:0007165                                                                                                                                                                                                                                                                                                                                                                                                                                                                                                              |
| CG8404  | Sox15        | -2.36         | 6.67E-07 | ectoderm development; GO:0007398; neurogenesis; GO:0007399; regulation of transcription; GO:0045449; regulation of transcription from Pol II promoter; GO:0006357; tRNA aminoacylation for protein translation; GO:0006418                                                                                                                                                                                                                                                                                                                                                                              |
| CG5518  | sda          | -2.33         | 8.94E-04 | proteolysis and peptidolysis; GO:0006508                                                                                                                                                                                                                                                                                                                                                                                                                                                                                                                                                                |
| CG11822 | nAcRbeta-21C | -2.23         | 3.37E-04 | ion transport; GO:0006811; transport; GO:0006810                                                                                                                                                                                                                                                                                                                                                                                                                                                                                                                                                        |
| CG4914  | CG4914       | -2.21         | 1.42E-05 | proteolysis and peptidolysis; GO:0006508; regulation of transcription, DNA-dependent; GO:0006355                                                                                                                                                                                                                                                                                                                                                                                                                                                                                                        |
| CG3359  | mfas         | -2.11         | 1.83E-03 | axonogenesis; GO:0007409; cell-cell adhesion; GO:0016337; ectoderm development; GO:0007398; signal transduction; GO:0007165                                                                                                                                                                                                                                                                                                                                                                                                                                                                             |
| CG9307  | CG9307       | -2.11         | 8.53E-04 | chitin metabolism; GO:0006030; polysaccharide metabolism; GO:0005976                                                                                                                                                                                                                                                                                                                                                                                                                                                                                                                                    |
| CG6906  | CG6906       | -2.08         | 2.31E-03 | one-carbon compound metabolism; GO:0006730                                                                                                                                                                                                                                                                                                                                                                                                                                                                                                                                                              |
| CG4859  | Mmp1         | -2.06         | 2.90E-05 | anti-apoptosis; GO:0006916; autophagic cell death; GO:0048102; dorsal trunk growth; GO:0035001; larval development (sensu Insecta); GO:0002168; proteolysis and peptidolysis; GO:0006508; salivary gland cell death; GO:0035071; tracheal system development (sensu Insecta); GO:0007424                                                                                                                                                                                                                                                                                                                |
| CG7722  | CG7722       | -2.04         | 2.35E-05 | proteolysis and peptidolysis; GO:0006508                                                                                                                                                                                                                                                                                                                                                                                                                                                                                                                                                                |
| CG1897  | msh, Dr      | -1.96         | 1.96E-03 | brain development; GO:0007420; central nervous system development; GO:0007417; dorsal/ventral pattern formation; GO:0009953; dorsal/ventral pattern formation, imaginal disc; GO:0007450; ectoderm development; GO:0007398; muscle development; GO:0007517; neuroblast cell fate determination; GO:0007400; neurogenesis; GO:0007399; pattern specification; GO:0007389; regulation of cell fate specification; GO:0042659; regulation of transcription; GO:0045449; regulation of transcription from Pol II promoter; GO:0006357; ventral cord development; GO:0007419; wing morphogenesis; GO:0007476 |
| CG8805  | wun2         | -1.94         | 4.16E-03 | G-protein coupled receptor protein signaling pathway; GO:0007186; dephosphorylation; GO:0016311; germ cell migration; GO:0008354; germ cell programmed cell death; GO:0035234; germ cell repulsion; GO:0035233; lipid metabolism; GO:0006629                                                                                                                                                                                                                                                                                                                                                            |
| CG10570 | CG10570      | -1.89         | 4.23E-03 |                                                                                                                                                                                                                                                                                                                                                                                                                                                                                                                                                                                                         |
| CG7447  | CG7447       | -1.85         | 1.12E-04 |                                                                                                                                                                                                                                                                                                                                                                                                                                                                                                                                                                                                         |
| CG7539  | Edg91        | -1.83         | 2.83E-03 |                                                                                                                                                                                                                                                                                                                                                                                                                                                                                                                                                                                                         |
| CG17914 | yellow-b     | -1.82         | 3.70E-03 |                                                                                                                                                                                                                                                                                                                                                                                                                                                                                                                                                                                                         |
| CG10121 | SP1173       | -1.79         | 9.58E-05 |                                                                                                                                                                                                                                                                                                                                                                                                                                                                                                                                                                                                         |
| CG15484 | CG15484      | -1.76         | 1.82E-04 |                                                                                                                                                                                                                                                                                                                                                                                                                                                                                                                                                                                                         |
| CG9023  | Drip         | -1.74         | 1.42E-03 | cell homeostasis; GO:0019725; water homeostasis; GO:0030104; water transport; GO:0006833                                                                                                                                                                                                                                                                                                                                                                                                                                                                                                                |
| CG15629 | CG15629      | -1.71         | 2.91E-04 | metabolism; GO:0008152; visual perception; GO:0007601                                                                                                                                                                                                                                                                                                                                                                                                                                                                                                                                                   |
| CG5840  | CG5840       | -1.71         | 1.20E-04 | amino acid biosynthesis; GO:0008652; proline biosynthesis; GO:0006561                                                                                                                                                                                                                                                                                                                                                                                                                                                                                                                                   |
| CG12840 | Tsp42E1      | -1.68         | 4.23E-03 | ectoderm development; GO:0007398; neurogenesis; GO:0007399; transmission of nerve impulse; GO:0019226                                                                                                                                                                                                                                                                                                                                                                                                                                                                                                   |
| CG15611 | CG15611      | -1.65         | 7.08E-04 |                                                                                                                                                                                                                                                                                                                                                                                                                                                                                                                                                                                                         |
| CG3983  | CG3983       | -1.62         | 7.65E-04 | cell surface receptor linked signal transduction; GO:0007166; intracellular protein transport; GO:0006886; intracellular signaling cascade; GO:0007242;                                                                                                                                                                                                                                                                                                                                                                                                                                                 |

|                |                       |              |                 |                                                                                                                                                                                                                                                                                                                                                                                                                                                                                                                                                                                                                                                                                  |
|----------------|-----------------------|--------------|-----------------|----------------------------------------------------------------------------------------------------------------------------------------------------------------------------------------------------------------------------------------------------------------------------------------------------------------------------------------------------------------------------------------------------------------------------------------------------------------------------------------------------------------------------------------------------------------------------------------------------------------------------------------------------------------------------------|
|                |                       |              |                 | nucleobase, nucleoside, nucleotide and nucleic acid metabolism; GO:0006139; nucleobase, nucleoside, nucleotide and nucleic acid transport; GO:0015931; protein metabolism; GO:0019538; regulation of translation; GO:0006445; signal transduction; GO:0007165; transport; GO:0006810                                                                                                                                                                                                                                                                                                                                                                                             |
| <b>CG11073</b> | <b>CG11073</b>        | <b>-1.60</b> | <b>6.09E-03</b> | /                                                                                                                                                                                                                                                                                                                                                                                                                                                                                                                                                                                                                                                                                |
| <b>CG10697</b> | <b>Ddc</b>            | <b>-1.57</b> | <b>1.10E-03</b> | catecholamine metabolism; GO:0006584; courtship behavior; GO:0007619; cuticle biosynthesis; GO:0042335; dopamine biosynthesis from tyrosine; GO:0006585; eclosion rhythm; GO:0008062; learning and/or memory; GO:0007611; melanin biosynthesis; GO:0042438; pigmentation; GO:0048066; serotonin biosynthesis from tryptophan; GO:0006587                                                                                                                                                                                                                                                                                                                                         |
| <b>CG14879</b> | <b>CG14879</b>        | <b>-1.56</b> | <b>2.45E-04</b> | /                                                                                                                                                                                                                                                                                                                                                                                                                                                                                                                                                                                                                                                                                |
| <b>CG4766</b>  | <b>CG4766</b>         | <b>-1.54</b> | <b>2.14E-03</b> | /                                                                                                                                                                                                                                                                                                                                                                                                                                                                                                                                                                                                                                                                                |
| <b>CG13097</b> | <b>CG13097</b>        | <b>-1.48</b> | <b>1.90E-03</b> | nucleobase, nucleoside, nucleotide and nucleic acid metabolism; GO:0006139; rRNA metabolism; GO:0016072                                                                                                                                                                                                                                                                                                                                                                                                                                                                                                                                                                          |
| <b>CG5874</b>  | <b>CG5874</b>         | <b>-1.46</b> | <b>3.67E-04</b> | negative regulation of transcription from Pol II promoter, mitotic; GO:0007070                                                                                                                                                                                                                                                                                                                                                                                                                                                                                                                                                                                                   |
| <b>CG3200</b>  | <b>Reg-2</b>          | <b>-1.46</b> | <b>1.03E-03</b> | metabolism; GO:0008152                                                                                                                                                                                                                                                                                                                                                                                                                                                                                                                                                                                                                                                           |
| <b>CG11259</b> | <b>MICAL-like</b>     | <b>-1.45</b> | <b>4.16E-03</b> | cytoskeleton organization and biogenesis; GO:0007010                                                                                                                                                                                                                                                                                                                                                                                                                                                                                                                                                                                                                             |
| <b>CG7367</b>  | <b>CG7367</b>         | <b>-1.43</b> | <b>3.50E-03</b> | lipid metabolism; GO:0006629                                                                                                                                                                                                                                                                                                                                                                                                                                                                                                                                                                                                                                                     |
| <b>CG6044</b>  | <b>CG6044</b>         | <b>-1.41</b> | <b>2.61E-04</b> | /                                                                                                                                                                                                                                                                                                                                                                                                                                                                                                                                                                                                                                                                                |
| <b>CG6724</b>  | <b>CG6724</b>         | <b>-1.39</b> | <b>7.40E-05</b> | /                                                                                                                                                                                                                                                                                                                                                                                                                                                                                                                                                                                                                                                                                |
| <b>CG17108</b> | <b>CG17108</b>        | <b>-1.39</b> | <b>1.32E-03</b> | transport; GO:0006810                                                                                                                                                                                                                                                                                                                                                                                                                                                                                                                                                                                                                                                            |
| <b>CG7182</b>  | <b>CG7182</b>         | <b>-1.33</b> | <b>4.57E-04</b> | defense response; GO:0006952; protein folding; GO:0006457; response to heat; GO:0009408; response to stress; GO:0006950                                                                                                                                                                                                                                                                                                                                                                                                                                                                                                                                                          |
| <b>CG6962</b>  | <b>CG6962</b>         | <b>-1.33</b> | <b>5.88E-04</b> | /                                                                                                                                                                                                                                                                                                                                                                                                                                                                                                                                                                                                                                                                                |
| <b>CG1698</b>  | <b>CG1698</b>         | <b>-1.33</b> | <b>7.62E-03</b> | amino acid metabolism; GO:0006520; amino acid transport; GO:0006865; cation transport; GO:0006812; extracellular transport; GO:0006858; neurotransmitter transport; GO:0006836                                                                                                                                                                                                                                                                                                                                                                                                                                                                                                   |
| <b>CG33188</b> | <b>CG16750</b>        | <b>-1.33</b> | <b>3.13E-04</b> | perception of sound; GO:0007605                                                                                                                                                                                                                                                                                                                                                                                                                                                                                                                                                                                                                                                  |
| <b>CG4567</b>  | <b>CG4567</b>         | <b>-1.32</b> | <b>3.96E-04</b> | translational elongation; GO:0006414                                                                                                                                                                                                                                                                                                                                                                                                                                                                                                                                                                                                                                             |
| <b>CG4357</b>  | <b>CG4357</b>         | <b>-1.29</b> | <b>9.90E-04</b> | amino acid transport; GO:0006865; cation transport; GO:0006812; chloride transport; GO:0006821; sodium ion transport; GO:0006814                                                                                                                                                                                                                                                                                                                                                                                                                                                                                                                                                 |
| <b>CG14479</b> | <b>CG14479</b>        | <b>-1.29</b> | <b>1.14E-03</b> | /                                                                                                                                                                                                                                                                                                                                                                                                                                                                                                                                                                                                                                                                                |
| <b>CG4319</b>  | <b>rpr</b>            | <b>-1.27</b> | <b>1.76E-04</b> | NOT nurse cell apoptosis; GO:0045476; apoptosis; GO:0006915; apoptotic program; GO:0008632; central nervous system metamorphosis; GO:0035193; ecdysone-mediated induction of salivary gland cell death; GO:0035072; embryonic development (sensu Insecta); GO:0001700; induction of apoptosis; GO:0006917; induction of apoptosis by ionic changes; GO:0008627; larval midgut cell death; GO:0035096; negative regulation of protein biosynthesis; GO:0017148; programmed cell death; GO:0012501; protein ubiquitination; GO:0016567; regulation of proteolysis and peptidolysis; GO:0030162; response to DNA damage stimulus; GO:0006974; salivary gland cell death; GO:0035071 |
| <b>CG5836</b>  | <b>SF1</b>            | <b>-1.26</b> | <b>3.67E-04</b> | nuclear mRNA splicing, via spliceosome; GO:0000398                                                                                                                                                                                                                                                                                                                                                                                                                                                                                                                                                                                                                               |
| <b>CG2512</b>  | <b>alphaTub84D</b>    | <b>-1.24</b> | <b>8.02E-06</b> | cell motility; GO:0006928; cellular physiological process; GO:0050875; chromosome segregation; GO:0007059; intracellular protein transport; GO:0006886; microtubule polymerization; GO:0046785; microtubule-based movement; GO:0007018; microtubule-based process; GO:0007017; mitosis; GO:0007067                                                                                                                                                                                                                                                                                                                                                                               |
| <b>CG10161</b> | <b>eIF-3p66</b>       | <b>-1.23</b> | <b>6.05E-03</b> | protein biosynthesis; GO:0006412; translational initiation; GO:0006413                                                                                                                                                                                                                                                                                                                                                                                                                                                                                                                                                                                                           |
| <b>CG7108</b>  | <b>DNAPol-alpha50</b> | <b>-1.23</b> | <b>7.18E-05</b> | DNA replication; GO:0006260; DNA replication, synthesis of RNA primer; GO:0006269                                                                                                                                                                                                                                                                                                                                                                                                                                                                                                                                                                                                |
| <b>CG7628</b>  | <b>CG7628</b>         | <b>-1.23</b> | <b>3.00E-03</b> | phosphate metabolism; GO:0006796; phosphate transport; GO:0006817                                                                                                                                                                                                                                                                                                                                                                                                                                                                                                                                                                                                                |
| <b>CG12534</b> | <b>CG12534</b>        | <b>-1.23</b> | <b>6.45E-04</b> | electron transport; GO:0006118; oxidative phosphorylation; GO:0006119                                                                                                                                                                                                                                                                                                                                                                                                                                                                                                                                                                                                            |
| <b>CG1210</b>  | <b>Pk61C</b>          | <b>-1.22</b> | <b>2.77E-03</b> | actin cytoskeleton organization and biogenesis; GO:0030036; anti-apoptosis; GO:0006916; glycogen metabolism; GO:0005977; insulin receptor signaling pathway; GO:0008286; intracellular signaling cascade; GO:0007242; oogenesis (sensu Insecta); GO:0009993; positive regulation of cell growth; GO:0030307; positive regulation of cell size; GO:0045793; potassium ion transport; GO:0006813; protein amino acid phosphorylation; GO:0006468; regulation of cell growth; GO:0001558; regulation of organ size; GO:0046620; sex differentiation; GO:0007548; spermatogenesis; GO:0007283                                                                                        |
| <b>CG1091</b>  | <b>CG1091</b>         | <b>-1.22</b> | <b>3.21E-03</b> | /                                                                                                                                                                                                                                                                                                                                                                                                                                                                                                                                                                                                                                                                                |
| <b>CG3691</b>  | <b>Pof</b>            | <b>-1.21</b> | <b>4.87E-03</b> | protein biosynthesis; GO:0006412                                                                                                                                                                                                                                                                                                                                                                                                                                                                                                                                                                                                                                                 |
| <b>CG6014</b>  | <b>CG6014</b>         | <b>-1.21</b> | <b>1.01E-03</b> | /                                                                                                                                                                                                                                                                                                                                                                                                                                                                                                                                                                                                                                                                                |
| <b>CG5355</b>  | <b>CG5355</b>         | <b>-1.21</b> | <b>1.98E-03</b> | proteolysis and peptidolysis; GO:0006508                                                                                                                                                                                                                                                                                                                                                                                                                                                                                                                                                                                                                                         |
| <b>CG17124</b> | <b>CG17124</b>        | <b>-1.20</b> | <b>5.00E-06</b> | /                                                                                                                                                                                                                                                                                                                                                                                                                                                                                                                                                                                                                                                                                |
| <b>CG17843</b> | <b>CG17843</b>        | <b>-1.19</b> | <b>3.45E-03</b> | electron transport; GO:0006118                                                                                                                                                                                                                                                                                                                                                                                                                                                                                                                                                                                                                                                   |
| <b>CG17337</b> | <b>CG17337</b>        | <b>-1.19</b> | <b>4.61E-04</b> | /                                                                                                                                                                                                                                                                                                                                                                                                                                                                                                                                                                                                                                                                                |
| <b>CG13849</b> | <b>Nop56</b>          | <b>-1.18</b> | <b>1.02E-03</b> | rRNA metabolism; GO:0016072                                                                                                                                                                                                                                                                                                                                                                                                                                                                                                                                                                                                                                                      |
| <b>CG4978</b>  | <b>Mcm7</b>           | <b>-1.17</b> | <b>5.32E-04</b> | DNA replication initiation; GO:0006270; pre-replicative complex formation and maintenance; GO:0006267                                                                                                                                                                                                                                                                                                                                                                                                                                                                                                                                                                            |
| <b>CG10363</b> | <b>TepIV</b>          | <b>-1.17</b> | <b>9.13E-03</b> | antibacterial humoral response (sensu Protostomia); GO:0006961; phosphoenolpyruvate-dependent sugar phosphotransferase system; GO:0009401                                                                                                                                                                                                                                                                                                                                                                                                                                                                                                                                        |
| <b>CG1572</b>  | <b>CG1572</b>         | <b>-1.16</b> | <b>1.05E-03</b> | /                                                                                                                                                                                                                                                                                                                                                                                                                                                                                                                                                                                                                                                                                |
| <b>CG7583</b>  | <b>CtBP</b>           | <b>-1.16</b> | <b>3.75E-03</b> | L-serine biosynthesis; GO:0006564; negative regulation of transcription from Pol II promoter; GO:0000122                                                                                                                                                                                                                                                                                                                                                                                                                                                                                                                                                                         |
| <b>CG11450</b> | <b>net</b>            | <b>-1.15</b> | <b>6.91E-03</b> | regulation of transcription; GO:0045449                                                                                                                                                                                                                                                                                                                                                                                                                                                                                                                                                                                                                                          |
| <b>CG18410</b> | <b>CG18410</b>        | <b>-1.14</b> | <b>1.13E-03</b> | /                                                                                                                                                                                                                                                                                                                                                                                                                                                                                                                                                                                                                                                                                |
| <b>CG13813</b> | <b>CG13813</b>        | <b>-1.14</b> | <b>1.09E-03</b> | /                                                                                                                                                                                                                                                                                                                                                                                                                                                                                                                                                                                                                                                                                |
| <b>CG2863</b>  | <b>Nle</b>            | <b>-1.12</b> | <b>7.95E-04</b> | G-protein coupled receptor protein signaling pathway; GO:0007186; Notch signaling pathway; GO:0007219                                                                                                                                                                                                                                                                                                                                                                                                                                                                                                                                                                            |
| <b>CG6375</b>  | <b>pit</b>            | <b>-1.12</b> | <b>4.89E-04</b> | nucleobase, nucleoside, nucleotide and nucleic acid metabolism; GO:0006139                                                                                                                                                                                                                                                                                                                                                                                                                                                                                                                                                                                                       |
| <b>CG6897</b>  | <b>CG6897</b>         | <b>-1.12</b> | <b>1.57E-05</b> | /                                                                                                                                                                                                                                                                                                                                                                                                                                                                                                                                                                                                                                                                                |
| <b>CG6868</b>  | <b>tld</b>            | <b>-1.12</b> | <b>1.73E-03</b> | amnioserosa formation; GO:0007378; embryonic pattern specification; GO:0009880; positive regulation of BMP signaling pathway; GO:0030513; proteolysis and peptidolysis; GO:0006508; regulation of transforming growth factor beta receptor signaling pathway; GO:0017015; terminal region determination; GO:0007362; torso signaling pathway; GO:0008293; zygotic determination of dorsal/ventral axis; GO:0007352                                                                                                                                                                                                                                                               |
| <b>CG5393</b>  | <b>apt</b>            | <b>-1.11</b> | <b>2.37E-04</b> | central nervous system development; GO:0007417; heart development; GO:0007507; negative regulation of oskar mRNA translation; GO:0007319; primary tracheal branching (sensu Insecta); GO:0007428; regulation of transcription from Pol II promoter; GO:0006357; tracheal system development (sensu Insecta); GO:0007424                                                                                                                                                                                                                                                                                                                                                          |
| <b>CG11525</b> | <b>CycG</b>           | <b>-1.10</b> | <b>6.53E-04</b> | DNA repair; GO:0006281                                                                                                                                                                                                                                                                                                                                                                                                                                                                                                                                                                                                                                                           |
| <b>CG3568</b>  | <b>CG3568</b>         | <b>-1.07</b> | <b>4.84E-05</b> | /                                                                                                                                                                                                                                                                                                                                                                                                                                                                                                                                                                                                                                                                                |
| <b>CG6739</b>  | <b>CG6739</b>         | <b>-1.07</b> | <b>4.95E-03</b> | development; GO:0007275                                                                                                                                                                                                                                                                                                                                                                                                                                                                                                                                                                                                                                                          |
| <b>CG13692</b> | <b>CG13692</b>        | <b>-1.06</b> | <b>1.90E-04</b> | protein amino acid ADP-ribosylation; GO:0006471                                                                                                                                                                                                                                                                                                                                                                                                                                                                                                                                                                                                                                  |
| <b>CG6023</b>  | <b>CG6023</b>         | <b>-1.06</b> | <b>4.55E-04</b> | /                                                                                                                                                                                                                                                                                                                                                                                                                                                                                                                                                                                                                                                                                |
| <b>CG11190</b> | <b>CG11190</b>        | <b>-1.06</b> | <b>9.42E-04</b> | attachment of GPI anchor to protein; GO:0016255                                                                                                                                                                                                                                                                                                                                                                                                                                                                                                                                                                                                                                  |

|                |                       |              |                 |                                                                                                                                                                                                                                                                                                                                                                                                                                                                                                                                                                                                                                                                                                                                                                                                                                                                                                                                                                                                                                                                                                                                                                                                                                                                                                                                                                                                                                                                                                                                                                                                                                                                                                                                                                                                                                                                                                                                                                                                                                                                                                                                                                                                                                                                                                                                                                                                                                                                                                                                                                                                       |
|----------------|-----------------------|--------------|-----------------|-------------------------------------------------------------------------------------------------------------------------------------------------------------------------------------------------------------------------------------------------------------------------------------------------------------------------------------------------------------------------------------------------------------------------------------------------------------------------------------------------------------------------------------------------------------------------------------------------------------------------------------------------------------------------------------------------------------------------------------------------------------------------------------------------------------------------------------------------------------------------------------------------------------------------------------------------------------------------------------------------------------------------------------------------------------------------------------------------------------------------------------------------------------------------------------------------------------------------------------------------------------------------------------------------------------------------------------------------------------------------------------------------------------------------------------------------------------------------------------------------------------------------------------------------------------------------------------------------------------------------------------------------------------------------------------------------------------------------------------------------------------------------------------------------------------------------------------------------------------------------------------------------------------------------------------------------------------------------------------------------------------------------------------------------------------------------------------------------------------------------------------------------------------------------------------------------------------------------------------------------------------------------------------------------------------------------------------------------------------------------------------------------------------------------------------------------------------------------------------------------------------------------------------------------------------------------------------------------------|
| <b>CG1794</b>  | <b>Mmp2</b>           | <b>-1.05</b> | <b>5.54E-04</b> | anti-apoptosis; GO:0006916; oogenesis (sensu Insecta); GO:0009993; proteolysis and peptidolysis; GO:0006508                                                                                                                                                                                                                                                                                                                                                                                                                                                                                                                                                                                                                                                                                                                                                                                                                                                                                                                                                                                                                                                                                                                                                                                                                                                                                                                                                                                                                                                                                                                                                                                                                                                                                                                                                                                                                                                                                                                                                                                                                                                                                                                                                                                                                                                                                                                                                                                                                                                                                           |
| <b>CG14984</b> | <b>CG14984</b>        | <b>-1.05</b> | <b>8.72E-03</b> | /                                                                                                                                                                                                                                                                                                                                                                                                                                                                                                                                                                                                                                                                                                                                                                                                                                                                                                                                                                                                                                                                                                                                                                                                                                                                                                                                                                                                                                                                                                                                                                                                                                                                                                                                                                                                                                                                                                                                                                                                                                                                                                                                                                                                                                                                                                                                                                                                                                                                                                                                                                                                     |
| <b>CG12358</b> | <b>Paip2</b>          | <b>-1.05</b> | <b>2.03E-03</b> | negative regulation of translation; GO:0016478                                                                                                                                                                                                                                                                                                                                                                                                                                                                                                                                                                                                                                                                                                                                                                                                                                                                                                                                                                                                                                                                                                                                                                                                                                                                                                                                                                                                                                                                                                                                                                                                                                                                                                                                                                                                                                                                                                                                                                                                                                                                                                                                                                                                                                                                                                                                                                                                                                                                                                                                                        |
| <b>CG3254</b>  | <b>pgant2</b>         | <b>-1.05</b> | <b>1.30E-03</b> | oligosaccharide biosynthesis; GO:0009312; polysaccharide metabolism; GO:0005976; protein amino acid glycosylation; GO:0006486                                                                                                                                                                                                                                                                                                                                                                                                                                                                                                                                                                                                                                                                                                                                                                                                                                                                                                                                                                                                                                                                                                                                                                                                                                                                                                                                                                                                                                                                                                                                                                                                                                                                                                                                                                                                                                                                                                                                                                                                                                                                                                                                                                                                                                                                                                                                                                                                                                                                         |
| <b>CG5913</b>  | <b>CG5913</b>         | <b>-1.04</b> | <b>2.11E-04</b> | /                                                                                                                                                                                                                                                                                                                                                                                                                                                                                                                                                                                                                                                                                                                                                                                                                                                                                                                                                                                                                                                                                                                                                                                                                                                                                                                                                                                                                                                                                                                                                                                                                                                                                                                                                                                                                                                                                                                                                                                                                                                                                                                                                                                                                                                                                                                                                                                                                                                                                                                                                                                                     |
| <b>CG7478</b>  | <b>Act79B</b>         | <b>-1.03</b> | <b>4.75E-03</b> | cytoskeleton organization and biogenesis; GO:0007010                                                                                                                                                                                                                                                                                                                                                                                                                                                                                                                                                                                                                                                                                                                                                                                                                                                                                                                                                                                                                                                                                                                                                                                                                                                                                                                                                                                                                                                                                                                                                                                                                                                                                                                                                                                                                                                                                                                                                                                                                                                                                                                                                                                                                                                                                                                                                                                                                                                                                                                                                  |
| <b>CG10354</b> | <b>CG10354</b>        | <b>-1.03</b> | <b>1.01E-03</b> | DNA metabolism; GO:0006259; nucleobase, nucleoside, nucleotide and nucleic acid metabolism; GO:0006139                                                                                                                                                                                                                                                                                                                                                                                                                                                                                                                                                                                                                                                                                                                                                                                                                                                                                                                                                                                                                                                                                                                                                                                                                                                                                                                                                                                                                                                                                                                                                                                                                                                                                                                                                                                                                                                                                                                                                                                                                                                                                                                                                                                                                                                                                                                                                                                                                                                                                                |
| <b>CG32699</b> | <b>CG18535</b>        | <b>-1.03</b> | <b>7.57E-04</b> | metabolism; GO:0008152                                                                                                                                                                                                                                                                                                                                                                                                                                                                                                                                                                                                                                                                                                                                                                                                                                                                                                                                                                                                                                                                                                                                                                                                                                                                                                                                                                                                                                                                                                                                                                                                                                                                                                                                                                                                                                                                                                                                                                                                                                                                                                                                                                                                                                                                                                                                                                                                                                                                                                                                                                                |
| <b>CG3036</b>  | <b>CG3036</b>         | <b>-1.02</b> | <b>6.28E-04</b> | carbohydrate metabolism; GO:0005975; carbohydrate transport; GO:0008643; cation transport; GO:0006812; extracellular transport; GO:0006858; phosphate metabolism; GO:0006796; phosphate transport; GO:0006817                                                                                                                                                                                                                                                                                                                                                                                                                                                                                                                                                                                                                                                                                                                                                                                                                                                                                                                                                                                                                                                                                                                                                                                                                                                                                                                                                                                                                                                                                                                                                                                                                                                                                                                                                                                                                                                                                                                                                                                                                                                                                                                                                                                                                                                                                                                                                                                         |
| <b>CG15561</b> | <b>CG15561</b>        | <b>-1.02</b> | <b>2.33E-03</b> | /                                                                                                                                                                                                                                                                                                                                                                                                                                                                                                                                                                                                                                                                                                                                                                                                                                                                                                                                                                                                                                                                                                                                                                                                                                                                                                                                                                                                                                                                                                                                                                                                                                                                                                                                                                                                                                                                                                                                                                                                                                                                                                                                                                                                                                                                                                                                                                                                                                                                                                                                                                                                     |
| <b>CG1874</b>  | <b>CG1874</b>         | <b>-1.01</b> | <b>3.24E-03</b> | /                                                                                                                                                                                                                                                                                                                                                                                                                                                                                                                                                                                                                                                                                                                                                                                                                                                                                                                                                                                                                                                                                                                                                                                                                                                                                                                                                                                                                                                                                                                                                                                                                                                                                                                                                                                                                                                                                                                                                                                                                                                                                                                                                                                                                                                                                                                                                                                                                                                                                                                                                                                                     |
| <b>CG5114</b>  | <b>CG5114</b>         | <b>-1.00</b> | <b>1.68E-03</b> | /                                                                                                                                                                                                                                                                                                                                                                                                                                                                                                                                                                                                                                                                                                                                                                                                                                                                                                                                                                                                                                                                                                                                                                                                                                                                                                                                                                                                                                                                                                                                                                                                                                                                                                                                                                                                                                                                                                                                                                                                                                                                                                                                                                                                                                                                                                                                                                                                                                                                                                                                                                                                     |
| <b>CG7564</b>  | <b>CG7564</b>         | <b>-1.00</b> | <b>7.09E-03</b> | nuclear mRNA splicing, via spliceosome; GO:0000398                                                                                                                                                                                                                                                                                                                                                                                                                                                                                                                                                                                                                                                                                                                                                                                                                                                                                                                                                                                                                                                                                                                                                                                                                                                                                                                                                                                                                                                                                                                                                                                                                                                                                                                                                                                                                                                                                                                                                                                                                                                                                                                                                                                                                                                                                                                                                                                                                                                                                                                                                    |
| <b>CG11990</b> | <b>CG11990</b>        | <b>-1.00</b> | <b>8.99E-05</b> | /                                                                                                                                                                                                                                                                                                                                                                                                                                                                                                                                                                                                                                                                                                                                                                                                                                                                                                                                                                                                                                                                                                                                                                                                                                                                                                                                                                                                                                                                                                                                                                                                                                                                                                                                                                                                                                                                                                                                                                                                                                                                                                                                                                                                                                                                                                                                                                                                                                                                                                                                                                                                     |
| <b>CG10336</b> | <b>CG10336</b>        | <b>-0.97</b> | <b>1.04E-03</b> | /                                                                                                                                                                                                                                                                                                                                                                                                                                                                                                                                                                                                                                                                                                                                                                                                                                                                                                                                                                                                                                                                                                                                                                                                                                                                                                                                                                                                                                                                                                                                                                                                                                                                                                                                                                                                                                                                                                                                                                                                                                                                                                                                                                                                                                                                                                                                                                                                                                                                                                                                                                                                     |
| <b>CG4027</b>  | <b>Act5C</b>          | <b>-0.97</b> | <b>3.91E-03</b> | cytoskeleton organization and biogenesis; GO:0007010; sperm individualization; GO:0007291                                                                                                                                                                                                                                                                                                                                                                                                                                                                                                                                                                                                                                                                                                                                                                                                                                                                                                                                                                                                                                                                                                                                                                                                                                                                                                                                                                                                                                                                                                                                                                                                                                                                                                                                                                                                                                                                                                                                                                                                                                                                                                                                                                                                                                                                                                                                                                                                                                                                                                             |
| <b>CG5014</b>  | <b>Vap-33-1</b>       | <b>-0.97</b> | <b>8.06E-03</b> | intracellular protein transport; GO:0006886; neuromuscular junction development; GO:0007528; neurotransmitter secretion; GO:0007269; synaptic transmission; GO:0007268; synaptic vesicle priming; GO:0016082; transmission of nerve impulse; GO:0019226; vesicle-mediated transport; GO:0016192                                                                                                                                                                                                                                                                                                                                                                                                                                                                                                                                                                                                                                                                                                                                                                                                                                                                                                                                                                                                                                                                                                                                                                                                                                                                                                                                                                                                                                                                                                                                                                                                                                                                                                                                                                                                                                                                                                                                                                                                                                                                                                                                                                                                                                                                                                       |
| <b>CG13586</b> | <b>itp</b>            | <b>-0.97</b> | <b>8.36E-04</b> | neuropeptide signaling pathway; GO:0007218                                                                                                                                                                                                                                                                                                                                                                                                                                                                                                                                                                                                                                                                                                                                                                                                                                                                                                                                                                                                                                                                                                                                                                                                                                                                                                                                                                                                                                                                                                                                                                                                                                                                                                                                                                                                                                                                                                                                                                                                                                                                                                                                                                                                                                                                                                                                                                                                                                                                                                                                                            |
| <b>CG8545</b>  | <b>CG8545</b>         | <b>-0.97</b> | <b>2.26E-03</b> | rRNA metabolism; GO:0016072; rRNA processing; GO:0006364                                                                                                                                                                                                                                                                                                                                                                                                                                                                                                                                                                                                                                                                                                                                                                                                                                                                                                                                                                                                                                                                                                                                                                                                                                                                                                                                                                                                                                                                                                                                                                                                                                                                                                                                                                                                                                                                                                                                                                                                                                                                                                                                                                                                                                                                                                                                                                                                                                                                                                                                              |
| <b>CG4591</b>  | <b>Tsp86D</b>         | <b>-0.96</b> | <b>9.46E-07</b> | cell-cell adhesion; GO:0016337; signal transduction; GO:0007165                                                                                                                                                                                                                                                                                                                                                                                                                                                                                                                                                                                                                                                                                                                                                                                                                                                                                                                                                                                                                                                                                                                                                                                                                                                                                                                                                                                                                                                                                                                                                                                                                                                                                                                                                                                                                                                                                                                                                                                                                                                                                                                                                                                                                                                                                                                                                                                                                                                                                                                                       |
| <b>CG8171</b>  | <b>dup</b>            | <b>-0.96</b> | <b>1.22E-03</b> | DNA replication; GO:0006260; DNA replication checkpoint; GO:0000076; DNA-dependent DNA replication; GO:0006261; chorion gene amplification; GO:0007307; eggshell formation (sensu Insecta); GO:0007304                                                                                                                                                                                                                                                                                                                                                                                                                                                                                                                                                                                                                                                                                                                                                                                                                                                                                                                                                                                                                                                                                                                                                                                                                                                                                                                                                                                                                                                                                                                                                                                                                                                                                                                                                                                                                                                                                                                                                                                                                                                                                                                                                                                                                                                                                                                                                                                                |
| <b>CG1483</b>  | <b>Map205</b>         | <b>-0.96</b> | <b>4.67E-03</b> | microtubule-based process; GO:0007017                                                                                                                                                                                                                                                                                                                                                                                                                                                                                                                                                                                                                                                                                                                                                                                                                                                                                                                                                                                                                                                                                                                                                                                                                                                                                                                                                                                                                                                                                                                                                                                                                                                                                                                                                                                                                                                                                                                                                                                                                                                                                                                                                                                                                                                                                                                                                                                                                                                                                                                                                                 |
| <b>CG13780</b> | <b>Pvf2</b>           | <b>-0.95</b> | <b>7.70E-04</b> | hemocyte cell migration (sensu Arthropoda); GO:0035099; hemocyte proliferation (sensu Arthropoda); GO:0035172                                                                                                                                                                                                                                                                                                                                                                                                                                                                                                                                                                                                                                                                                                                                                                                                                                                                                                                                                                                                                                                                                                                                                                                                                                                                                                                                                                                                                                                                                                                                                                                                                                                                                                                                                                                                                                                                                                                                                                                                                                                                                                                                                                                                                                                                                                                                                                                                                                                                                         |
| <b>CG10527</b> | <b>CG10527</b>        | <b>-0.95</b> | <b>2.46E-03</b> | /                                                                                                                                                                                                                                                                                                                                                                                                                                                                                                                                                                                                                                                                                                                                                                                                                                                                                                                                                                                                                                                                                                                                                                                                                                                                                                                                                                                                                                                                                                                                                                                                                                                                                                                                                                                                                                                                                                                                                                                                                                                                                                                                                                                                                                                                                                                                                                                                                                                                                                                                                                                                     |
| <b>CG10337</b> | <b>CG10337</b>        | <b>-0.95</b> | <b>5.78E-03</b> | /                                                                                                                                                                                                                                                                                                                                                                                                                                                                                                                                                                                                                                                                                                                                                                                                                                                                                                                                                                                                                                                                                                                                                                                                                                                                                                                                                                                                                                                                                                                                                                                                                                                                                                                                                                                                                                                                                                                                                                                                                                                                                                                                                                                                                                                                                                                                                                                                                                                                                                                                                                                                     |
| <b>CG7839</b>  | <b>CG7839</b>         | <b>-0.95</b> | <b>2.87E-03</b> | regulation of transcription; GO:0045449; regulation of transcription from Pol II promoter; GO:0006357                                                                                                                                                                                                                                                                                                                                                                                                                                                                                                                                                                                                                                                                                                                                                                                                                                                                                                                                                                                                                                                                                                                                                                                                                                                                                                                                                                                                                                                                                                                                                                                                                                                                                                                                                                                                                                                                                                                                                                                                                                                                                                                                                                                                                                                                                                                                                                                                                                                                                                 |
| <b>CG7059</b>  | <b>CG7059</b>         | <b>-0.95</b> | <b>5.91E-04</b> | glycolysis; GO:0006096; microtubule-based movement; GO:0007018                                                                                                                                                                                                                                                                                                                                                                                                                                                                                                                                                                                                                                                                                                                                                                                                                                                                                                                                                                                                                                                                                                                                                                                                                                                                                                                                                                                                                                                                                                                                                                                                                                                                                                                                                                                                                                                                                                                                                                                                                                                                                                                                                                                                                                                                                                                                                                                                                                                                                                                                        |
| <b>CG13690</b> | <b>CG13690</b>        | <b>-0.95</b> | <b>3.34E-04</b> | RNA catabolism; GO:0006401                                                                                                                                                                                                                                                                                                                                                                                                                                                                                                                                                                                                                                                                                                                                                                                                                                                                                                                                                                                                                                                                                                                                                                                                                                                                                                                                                                                                                                                                                                                                                                                                                                                                                                                                                                                                                                                                                                                                                                                                                                                                                                                                                                                                                                                                                                                                                                                                                                                                                                                                                                            |
| <b>CG1994</b>  | <b>l(1)G0020</b>      | <b>-0.94</b> | <b>2.63E-03</b> | biological process unknown; GO:0000004                                                                                                                                                                                                                                                                                                                                                                                                                                                                                                                                                                                                                                                                                                                                                                                                                                                                                                                                                                                                                                                                                                                                                                                                                                                                                                                                                                                                                                                                                                                                                                                                                                                                                                                                                                                                                                                                                                                                                                                                                                                                                                                                                                                                                                                                                                                                                                                                                                                                                                                                                                |
| <b>CG10645</b> | <b>lama</b>           | <b>-0.94</b> | <b>2.49E-04</b> | /                                                                                                                                                                                                                                                                                                                                                                                                                                                                                                                                                                                                                                                                                                                                                                                                                                                                                                                                                                                                                                                                                                                                                                                                                                                                                                                                                                                                                                                                                                                                                                                                                                                                                                                                                                                                                                                                                                                                                                                                                                                                                                                                                                                                                                                                                                                                                                                                                                                                                                                                                                                                     |
| <b>CG7842</b>  | <b>CG7842</b>         | <b>-0.94</b> | <b>1.23E-06</b> | fatty acid biosynthesis; GO:0006633                                                                                                                                                                                                                                                                                                                                                                                                                                                                                                                                                                                                                                                                                                                                                                                                                                                                                                                                                                                                                                                                                                                                                                                                                                                                                                                                                                                                                                                                                                                                                                                                                                                                                                                                                                                                                                                                                                                                                                                                                                                                                                                                                                                                                                                                                                                                                                                                                                                                                                                                                                   |
| <b>CG18290</b> | <b>Act87E</b>         | <b>-0.93</b> | <b>3.71E-03</b> | cytoskeleton organization and biogenesis; GO:0007010                                                                                                                                                                                                                                                                                                                                                                                                                                                                                                                                                                                                                                                                                                                                                                                                                                                                                                                                                                                                                                                                                                                                                                                                                                                                                                                                                                                                                                                                                                                                                                                                                                                                                                                                                                                                                                                                                                                                                                                                                                                                                                                                                                                                                                                                                                                                                                                                                                                                                                                                                  |
| <b>CG1677</b>  | <b>CG1677</b>         | <b>-0.93</b> | <b>3.87E-03</b> | /                                                                                                                                                                                                                                                                                                                                                                                                                                                                                                                                                                                                                                                                                                                                                                                                                                                                                                                                                                                                                                                                                                                                                                                                                                                                                                                                                                                                                                                                                                                                                                                                                                                                                                                                                                                                                                                                                                                                                                                                                                                                                                                                                                                                                                                                                                                                                                                                                                                                                                                                                                                                     |
| <b>CG13691</b> | <b>CG13691</b>        | <b>-0.93</b> | <b>8.90E-04</b> | /                                                                                                                                                                                                                                                                                                                                                                                                                                                                                                                                                                                                                                                                                                                                                                                                                                                                                                                                                                                                                                                                                                                                                                                                                                                                                                                                                                                                                                                                                                                                                                                                                                                                                                                                                                                                                                                                                                                                                                                                                                                                                                                                                                                                                                                                                                                                                                                                                                                                                                                                                                                                     |
| <b>CG10722</b> | <b>CG10722</b>        | <b>-0.93</b> | <b>1.01E-03</b> | /                                                                                                                                                                                                                                                                                                                                                                                                                                                                                                                                                                                                                                                                                                                                                                                                                                                                                                                                                                                                                                                                                                                                                                                                                                                                                                                                                                                                                                                                                                                                                                                                                                                                                                                                                                                                                                                                                                                                                                                                                                                                                                                                                                                                                                                                                                                                                                                                                                                                                                                                                                                                     |
| <b>CG6751</b>  | <b>CG6751</b>         | <b>-0.93</b> | <b>4.53E-03</b> | general RNA polymerase II transcription factor activity; GO:0016251; ; GO:0016251                                                                                                                                                                                                                                                                                                                                                                                                                                                                                                                                                                                                                                                                                                                                                                                                                                                                                                                                                                                                                                                                                                                                                                                                                                                                                                                                                                                                                                                                                                                                                                                                                                                                                                                                                                                                                                                                                                                                                                                                                                                                                                                                                                                                                                                                                                                                                                                                                                                                                                                     |
| <b>CG8799</b>  | <b>l(2)03659</b>      | <b>-0.93</b> | <b>7.08E-04</b> | defense response; GO:0006952; development; GO:0007275; extracellular transport; GO:0006858; response to toxin; GO:0009636; transport; GO:0006810                                                                                                                                                                                                                                                                                                                                                                                                                                                                                                                                                                                                                                                                                                                                                                                                                                                                                                                                                                                                                                                                                                                                                                                                                                                                                                                                                                                                                                                                                                                                                                                                                                                                                                                                                                                                                                                                                                                                                                                                                                                                                                                                                                                                                                                                                                                                                                                                                                                      |
| <b>CG7804</b>  | <b>CG7804</b>         | <b>-0.92</b> | <b>2.95E-03</b> | nuclear mRNA splicing, via spliceosome; GO:0000398; regulation of transcription from Pol II promoter; GO:0006357                                                                                                                                                                                                                                                                                                                                                                                                                                                                                                                                                                                                                                                                                                                                                                                                                                                                                                                                                                                                                                                                                                                                                                                                                                                                                                                                                                                                                                                                                                                                                                                                                                                                                                                                                                                                                                                                                                                                                                                                                                                                                                                                                                                                                                                                                                                                                                                                                                                                                      |
| <b>CG2028</b>  | <b>CkIalpha</b>       | <b>-0.92</b> | <b>9.85E-03</b> | DNA repair; GO:0006281; Wnt receptor signaling pathway; GO:0016055; intracellular signaling cascade; GO:0007242; negative regulation of smoothened signaling pathway; GO:0045879; protein amino acid phosphorylation; GO:0006468; protein catabolism; GO:0030163; regulation of proteolysis and peptidolysis; GO:0030162; smoothened signaling pathway; GO:0007224                                                                                                                                                                                                                                                                                                                                                                                                                                                                                                                                                                                                                                                                                                                                                                                                                                                                                                                                                                                                                                                                                                                                                                                                                                                                                                                                                                                                                                                                                                                                                                                                                                                                                                                                                                                                                                                                                                                                                                                                                                                                                                                                                                                                                                    |
| <b>CG7627</b>  | <b>CG7627</b>         | <b>-0.92</b> | <b>6.61E-03</b> | defense response; GO:0006952; extracellular transport; GO:0006858; response to toxin; GO:0009636                                                                                                                                                                                                                                                                                                                                                                                                                                                                                                                                                                                                                                                                                                                                                                                                                                                                                                                                                                                                                                                                                                                                                                                                                                                                                                                                                                                                                                                                                                                                                                                                                                                                                                                                                                                                                                                                                                                                                                                                                                                                                                                                                                                                                                                                                                                                                                                                                                                                                                      |
| <b>CG2918</b>  | <b>CG2918</b>         | <b>-0.91</b> | <b>1.07E-03</b> | defense response; GO:0006952; protein folding; GO:0006457; response to stress; GO:0006950                                                                                                                                                                                                                                                                                                                                                                                                                                                                                                                                                                                                                                                                                                                                                                                                                                                                                                                                                                                                                                                                                                                                                                                                                                                                                                                                                                                                                                                                                                                                                                                                                                                                                                                                                                                                                                                                                                                                                                                                                                                                                                                                                                                                                                                                                                                                                                                                                                                                                                             |
| <b>CG5353</b>  | <b>CG5353</b>         | <b>-0.91</b> | <b>7.27E-04</b> | /                                                                                                                                                                                                                                                                                                                                                                                                                                                                                                                                                                                                                                                                                                                                                                                                                                                                                                                                                                                                                                                                                                                                                                                                                                                                                                                                                                                                                                                                                                                                                                                                                                                                                                                                                                                                                                                                                                                                                                                                                                                                                                                                                                                                                                                                                                                                                                                                                                                                                                                                                                                                     |
| <b>CG9373</b>  | <b>CG9373</b>         | <b>-0.91</b> | <b>4.95E-03</b> | /                                                                                                                                                                                                                                                                                                                                                                                                                                                                                                                                                                                                                                                                                                                                                                                                                                                                                                                                                                                                                                                                                                                                                                                                                                                                                                                                                                                                                                                                                                                                                                                                                                                                                                                                                                                                                                                                                                                                                                                                                                                                                                                                                                                                                                                                                                                                                                                                                                                                                                                                                                                                     |
| <b>CG5923</b>  | <b>DNAPol-alpha73</b> | <b>-0.90</b> | <b>8.09E-05</b> | DNA-dependent DNA replication; GO:0006261                                                                                                                                                                                                                                                                                                                                                                                                                                                                                                                                                                                                                                                                                                                                                                                                                                                                                                                                                                                                                                                                                                                                                                                                                                                                                                                                                                                                                                                                                                                                                                                                                                                                                                                                                                                                                                                                                                                                                                                                                                                                                                                                                                                                                                                                                                                                                                                                                                                                                                                                                             |
| <b>CG5371</b>  | <b>RnrL</b>           | <b>-0.90</b> | <b>2.11E-04</b> | DNA replication; GO:0006260; purine base metabolism; GO:0006144; pyrimidine base metabolism; GO:0006206                                                                                                                                                                                                                                                                                                                                                                                                                                                                                                                                                                                                                                                                                                                                                                                                                                                                                                                                                                                                                                                                                                                                                                                                                                                                                                                                                                                                                                                                                                                                                                                                                                                                                                                                                                                                                                                                                                                                                                                                                                                                                                                                                                                                                                                                                                                                                                                                                                                                                               |
| <b>CG6743</b>  | <b>Nup170</b>         | <b>-0.90</b> | <b>1.47E-03</b> | protein targeting; GO:0006605                                                                                                                                                                                                                                                                                                                                                                                                                                                                                                                                                                                                                                                                                                                                                                                                                                                                                                                                                                                                                                                                                                                                                                                                                                                                                                                                                                                                                                                                                                                                                                                                                                                                                                                                                                                                                                                                                                                                                                                                                                                                                                                                                                                                                                                                                                                                                                                                                                                                                                                                                                         |
| <b>CG5326</b>  | <b>CG5326</b>         | <b>-0.88</b> | <b>3.84E-03</b> | fatty acid metabolism; GO:0006631; lipid metabolism; GO:0006629                                                                                                                                                                                                                                                                                                                                                                                                                                                                                                                                                                                                                                                                                                                                                                                                                                                                                                                                                                                                                                                                                                                                                                                                                                                                                                                                                                                                                                                                                                                                                                                                                                                                                                                                                                                                                                                                                                                                                                                                                                                                                                                                                                                                                                                                                                                                                                                                                                                                                                                                       |
| <b>CG9885</b>  | <b>dpp</b>            | <b>-0.88</b> | <b>3.83E-03</b> | BMP signaling pathway; GO:0030509; amnioserosa formation; GO:0007378; anterior/posterior axis specification; GO:0009948; anterior/posterior pattern formation, imaginal disc; GO:0007448; branch cell fate determination (sensu Insecta); GO:0046845; cell fate determination; GO:0001709; cell fate specification; GO:0001708; cell-cell signaling; GO:0007267; compound eye morphogenesis (sensu Endopterygota); GO:0001745; dorsal appendage formation; GO:0046843; dorsal closure; GO:0007391; dorsal closure, leading edge cell fate determination; GO:0007393; dorsal/ventral axis specification; GO:0009950; dorsal/ventral pattern formation, imaginal disc; GO:0007450; ectoderm cell fate specification; GO:0001715; ectoderm development; GO:0007398; embryonic morphogenesis; GO:0009795; foregut morphogenesis; GO:0007440; genital disc development; GO:0035215; genital disc sexually dimorphic development; GO:0035263; germ-line stem cell division; GO:0042078; germ-line stem cell maintenance; GO:0030718; heart development; GO:0007507; hindgut morphogenesis; GO:0007442; imaginal disc development; GO:0007444; imaginal disc growth; GO:0007446; imaginal disc pattern formation; GO:0007447; larval development (sensu Insecta); GO:0002168; leg disc proximal/distal pattern formation; GO:0007479; negative regulation of cell proliferation; GO:0008285; negative regulation of salivary gland determination; GO:0045705; nurse cell apoptosis; GO:0045476; oogenesis (sensu Insecta); GO:0009993; ovarian follicle cell development (sensu Insecta); GO:0030707; pigmentation; GO:0048066; progression of morphogenetic furrow (sensu Endopterygota); GO:0007458; regulation of cell proliferation; GO:0042127; regulation of organ size; GO:0046620; regulation of tracheal tube diameter; GO:0035158; sensory organ development; GO:0007423; stem cell division; GO:0017145; stem cell maintenance; GO:0019827; tracheal branch fusion; GO:0035147; tracheal cell fate determination (sensu Insecta); GO:0007425; tracheal cell migration (sensu Insecta); GO:0007427; tracheal system development (sensu Insecta); GO:0007424; transforming growth factor beta receptor signaling pathway; GO:0007179; wing disc anterior/posterior pattern formation; GO:0048100; wing disc proximal/distal pattern formation; GO:0007473; wing morphogenesis; GO:0007476; wing vein morphogenesis; GO:0008586; wing vein specification; GO:0007474; zygotic determination of anterior/posterior axis, embryo; GO:0007354; zygotic determination of dorsal/ventral axis; GO:0007352 |
| <b>CG6530</b>  | <b>imthl3</b>         | <b>-0.88</b> | <b>9.78E-03</b> | G-protein coupled receptor protein signaling pathway; GO:0007186; determination of adult life span; GO:0008340; response to stress; GO:0006950                                                                                                                                                                                                                                                                                                                                                                                                                                                                                                                                                                                                                                                                                                                                                                                                                                                                                                                                                                                                                                                                                                                                                                                                                                                                                                                                                                                                                                                                                                                                                                                                                                                                                                                                                                                                                                                                                                                                                                                                                                                                                                                                                                                                                                                                                                                                                                                                                                                        |

|                         |                         |              |                 |                                                                                                                                                                                                                                                                                                |
|-------------------------|-------------------------|--------------|-----------------|------------------------------------------------------------------------------------------------------------------------------------------------------------------------------------------------------------------------------------------------------------------------------------------------|
| <a href="#">CG14191</a> | <a href="#">CG14191</a> | <b>-0.88</b> | <b>1.31E-03</b> | /                                                                                                                                                                                                                                                                                              |
| <a href="#">CG5452</a>  | <a href="#">dnk</a>     | <b>-0.88</b> | <b>3.23E-03</b> | TMP biosynthesis; GO:0006230; nucleoside diphosphate phosphorylation; GO:0006165; phosphorylation; GO:0016310; pyrimidine base metabolism; GO:0006206                                                                                                                                          |
| <a href="#">CG3198</a>  | <a href="#">CG3198</a>  | <b>-0.88</b> | <b>5.35E-03</b> | nuclear mRNA splicing, via spliceosome; GO:0000398                                                                                                                                                                                                                                             |
| <a href="#">CG17060</a> | <a href="#">Rab10</a>   | <b>-0.87</b> | <b>1.64E-03</b> | endocytosis; GO:0006897; intracellular protein transport; GO:0006886; regulation of exocytosis; GO:0017157; regulation of transcription, DNA-dependent; GO:0006355; small GTPase mediated signal transduction; GO:0007264; two-component signal transduction system (phosphorelay); GO:0000160 |
| <a href="#">CG5018</a>  | <a href="#">CG5018</a>  | <b>-0.87</b> | <b>4.72E-04</b> | /                                                                                                                                                                                                                                                                                              |
| <a href="#">CG9143</a>  | <a href="#">CG9143</a>  | <b>-0.86</b> | <b>2.34E-03</b> | nucleobase, nucleoside, nucleotide and nucleic acid metabolism; GO:0006139                                                                                                                                                                                                                     |
| <a href="#">CG33129</a> | <a href="#">CG6087</a>  | <b>-0.86</b> | <b>5.22E-03</b> | /                                                                                                                                                                                                                                                                                              |
| <a href="#">CG10863</a> | <a href="#">CG10863</a> | <b>-0.86</b> | <b>7.11E-03</b> | /                                                                                                                                                                                                                                                                                              |
| <a href="#">CG5553</a>  | <a href="#">DNAprim</a> | <b>-0.85</b> | <b>2.74E-03</b> | DNA replication; GO:0006260; DNA replication, synthesis of RNA primer; GO:0006269; S phase of mitotic cell cycle; GO:0000084; compound eye morphogenesis (sensu Endopterygota); GO:0001745                                                                                                     |
