# Supplementary material for: Regulation of cellular plasticity in Drosophila imaginal disc cells by the Polycomb group, trithorax group and lama genes
Source: Oxford University Press journal article supplement (doi:10.1242/dev.01927), 2005-08-02
Supplement: dev01927supptable_6.pdf [file dev01927supptable_6.pdf]

Table S6

|            | 1                                                                                                                                  | 10  | 20  | 30  | 40  | 50  | 60  | 70  | 80  | 90  | 100 | 110 | 120 | 130 |  |
|------------|------------------------------------------------------------------------------------------------------------------------------------|-----|-----|-----|-----|-----|-----|-----|-----|-----|-----|-----|-----|-----|--|
| DRO-Q94898 | MERPEYDGTTCATALWTKQVGFQIENWKQNDLVNIPTGVGRICYKDSVYENGWAQIEVETQRTYPDWVQAYAGMLEGSL                                                    |     |     |     |     |     |     |     |     |     |     |     |     |     |  |
| MUS-Q8BHG8 | MAAPYDGSSSGGWAARALRRALAL TSL TTLALLASLTGLLL SGPAGALPTLGPGRQNPDPVSRTRSLLLDAASGQLRLEDGFHPDAVAMANTNAIRETGMAYLDLSTNGRYNDSLQAYAGVVEASY  |     |     |     |     |     |     |     |     |     |     |     |     |     |  |
| HOM-Q8NHP8 | MYGQMYCYPGSHLARAL TRALALA-----LVLALLVGPFLSGLAGAI PAPGGWARDGQVPPASRSRSVLLDYSAGQLLMYDGRHPDAVAMANTNAIRETGMAYFLELGTSGQYNDLQAYAGVVEARY  |     |     |     |     |     |     |     |     |     |     |     |     |     |  |
| CEL-062146 | MTRLIRSKKQFLIRSLHSVFYYL-----GSL LHSTFEMNFVIGLLLATVVASQSSEGRDESITYKQLCIYDDKQVYLDGFDCRNQVAVR--RQNAVNTTGMTFLEVETKENYCPQLQAYSAGYLEGLL  |     |     |     |     |     |     |     |     |     |     |     |     |     |  |
| DIC-Q8MN53 | MKLFILLIYIVFLISNSYSLSSSDSSSDSGSDVQYYSLSQFQVYVQGKQI--PGSIAMGYFKDEMNDGHWGKLSIETVSTVSDNI AFKAGYLEGYL                                  |     |     |     |     |     |     |     |     |     |     |     |     |     |  |
| Consensus  | .....q.....p..!a...k#.v.e.GWa.levET..ty.d..qayaAG.lEG.l                                                                            |     |     |     |     |     |     |     |     |     |     |     |     |     |  |
|            | 131                                                                                                                                | 140 | 150 | 160 | 170 | 180 | 190 | 200 | 210 | 220 | 230 | 240 | 250 | 260 |  |
| DRO-Q94898 | TMRNIYNQMSNTISSSCERDESTQKFCGMLRDLTTNYHRLKRQTEK-AENDHYHQHLHFITQLEGLETGKRGASRRASDLEEEIPFSDFLMNAARDIQDLKIYYENYELQNSTEHTEEPRTDQPKN     |     |     |     |     |     |     |     |     |     |     |     |     |     |  |
| MUS-Q8BHG8 | SEELIYMHMMNTVYNYCGPFYEYGYCEKLNFLLEANLEMMQREMEL-NPDSPYHQVRLTLLQLKGLEDSYEGRLTFPTG--RFTIKPLGFLLLQISGLEDLE-----PALN-----KTNTKP-S       |     |     |     |     |     |     |     |     |     |     |     |     |     |  |
| HOM-Q8NHP8 | SEELIYMHMMNTVYNYCGPFYEYGYCERLKSFLLEANLEMMQEMES-NPDSPYHQVRLTLLQLKGLEDSYEGRVSPFAG--KFTIKPLGFLLLQLSGLEDLE-----LALN-----KTKIKP-S       |     |     |     |     |     |     |     |     |     |     |     |     |     |  |
| CEL-062146 | SKTYLTYHLKNAQEDYCKNF---TGYSRSLSDFLTENQKWIQSSLETYAPDDLWYGAVNRTYHQVSGLIDAYEGREFKPRI--TYELHPI--LYLNLNGDFYDLE-----KKN-----KTRDPAFE     |     |     |     |     |     |     |     |     |     |     |     |     |     |  |
| DIC-Q8MN53 | TMEYIYKFSGNFYFNFFNTSNIKEIPTETLT-FYSDNWEYMMERYNSSTTDPYMIQIRNAMSQQIGLYEGYNAAAGEDYQ--KTFIEIYMINLYGDMGDIYTLT-----TTPNNEFIPMDRKEVEQLM   |     |     |     |     |     |     |     |     |     |     |     |     |     |  |
| Consensus  | tw..iy..w.Nt..s.c...e.....c..L.dfl.t.N.....#..a..d.YHq..l...ql.GLe.gY...a...r.....ei.....fll.n..gDi.dL.....N.....d.p..             |     |     |     |     |     |     |     |     |     |     |     |     |     |  |
|            | 261                                                                                                                                | 270 | 280 | 290 | 300 | 310 | 320 | 330 | 340 | 350 | 360 | 370 | 380 | 390 |  |
| DRO-Q94898 | FFLPSATMLTKIVQEEESPQVLQLLFGHSTAGSYSSMLRIQKRYKFHYHFSSKLRSNTPVGVYDITFTGYPGILGSTDDFYTIKGRHLHAIYGGVGIKNEMLQLAKTVDPKKMVPVLRVMAANRISQNRQ |     |     |     |     |     |     |     |     |     |     |     |     |     |  |
| MUS-Q8BHG8 | LGSGLSALIKLL-----PGGHDLVAHNTMNSYQNLRIIKKYRLQFREGPQEEYPLVAGNMLVFSSYPGTIFSGDDFY-ILGSLVTLETTIGNKNPAL--WKYVQPQGCYLEMIRNVVANRLALDGA     |     |     |     |     |     |     |     |     |     |     |     |     |     |  |
| HOM-Q8NHP8 | LGSGLSALIKLL-----PGQSDLLVAHNTMNYQHMLRVIKKYMLQFREGPWGDYPLVPGNKLVFSSYPGTIFSCDDFY-ILGSLVTLETTIGNKNPAL--WKYVPRPGCVLEHVRNIVANRLASDGA    |     |     |     |     |     |     |     |     |     |     |     |     |     |  |
| CEL-062146 | QTGGKCSGLIKYA-----PGNADLFISQVTHSGFQNLRVIKLYKFGY-----DRQFYPGYASSFSSYPGLLYSSDDFA-LQTSGLAVIETTISVFNTSL--FENTKPYGQLPTHIRAIVSNQLARDAR   |     |     |     |     |     |     |     |     |     |     |     |     |     |  |
| DIC-Q8MN53 | ATTGHCTSIKLT-----NNCSDLSAHTSWADFVHIRIYKRINIPV-----ASTPYGSETLFSSYPGLLYSIDDYQIRPSKHLHLETNTILNQLT--YQQINAQS-FMYHVRNLVANRLANNGF        |     |     |     |     |     |     |     |     |     |     |     |     |     |  |
| Consensus  | ...gsct.liK.....p...#Ll..h.t...%s.MIR!.Krykf.y.....tvpG....FssYPG.l.S.DDFy.i.gs.Lh.iet..gikN..L..wk.v.p...vp.w.R..vaNrIa.#..       |     |     |     |     |     |     |     |     |     |     |     |     |     |  |
|            | 391                                                                                                                                | 400 | 410 | 420 | 430 | 440 | 450 | 460 | 470 | 480 | 490 | 500 | 510 | 520 |  |
| DRO-Q94898 | TWSAMSR-HPFTGAKQMITVDLNKMKVQDNLVYLEGDDKHDDAPVYVLENEKORTAIQQRHDQLRDMVHIAEQLPGMHTKKDVTQGFVPGNTSMLANGVPYFKNVLELSGVNYSDDQLTVADEEELTS   |     |     |     |     |     |     |     |     |     |     |     |     |     |  |
| MUS-Q8BHG8 | TWADVFKRFNSGTYNMQMIVDYKAFIPNGPSPG-----SRVLTILEQIPGMVYVADKT--AELYKTTYWASYNIPYFETVFNASGLQALVAQ---YGDWFSYTK                           |     |     |     |     |     |     |     |     |     |     |     |     |     |  |
| HOM-Q8NHP8 | TWADIFKRFNSGTYNMQMIVDYKAFIPGGPSPG-----SRVLTILEQIPGMVYVADKT--SELYQKTYWASYNIPSFETVFNASGLQALVAQ---YGDWFSYDG                           |     |     |     |     |     |     |     |     |     |     |     |     |     |  |
| CEL-062146 | EWCKLYSLYNSGTYNMQMAYLDYKFKFPNQPLPK-----NGLFYVLEQMPGKIYYSDLT--WFVEKYSYFPSYNIPIFFKEITEISGFIGQAQK---MGDFKNGA                          |     |     |     |     |     |     |     |     |     |     |     |     |     |  |
| DIC-Q8MN53 | QWYSIFVENNSGTNNIQFYVLDYKLFYPTSTELQ-----SDLLHIVEQYPGGYQAADVT--LTLWEQGYMPSYNIPIFFEEVFDILGYPYVEK---FGDLFTYEY                          |     |     |     |     |     |     |     |     |     |     |     |     |     |  |
| Consensus  | tWas..sr.nsgT.n.Qw..vDykkfkp...l.....d..w!.EQ.PGm....DvT....v...tyw.syn.PyFk.!.#.sG..y...q....gD.f....                             |     |     |     |     |     |     |     |     |     |     |     |     |     |  |
|            | 521                                                                                                                                | 530 | 540 | 550 | 560 | 570 | 580 | 590 | 600 | 610 | 620 | 630 | 640 | 650 |  |
| DRO-Q94898 | LASVDKYLRTHGFRGDLGSEQESIAYGNIDLKLFYNARLGISDFHAFAGPVFLRFQHTQPRTLEDEGQDGGVPPAASMGDERLSVSIEDADSLAEMELITERRSVRNDMRAIAMRKIGSGPFKUSEMSP  |     |     |     |     |     |     |     |     |     |     |     |     |     |  |
| MUS-Q8BHG8 | NPRAKIFQRDQSLVEDMDAMVRLMRYNDFLHDPLSLC-----EACNPKPNAENAI SARSDLNPAANGSYPFQALHQRAGGIDVYKVTSTLAKYMSMLAASGPT-WDQ-----CPPFQWSK-SP       |     |     |     |     |     |     |     |     |     |     |     |     |     |  |
| HOM-Q8NHP8 | SPRAQIFRRNQSLVQDMDSMVRLMRYNDFLHDPLSLC-----KACNPQNGENAI SARSDLNPAANGSYPFKALRQRSHGGIDVYKVTSM SLARILSLLAASGPT-WDQ-----VPPFQWST-SP     |     |     |     |     |     |     |     |     |     |     |     |     |     |  |
| CEL-062146 | SPRAKIFERDHNVDLDSL TALMRYNDYKNDEF SKC-----K-CNPPYSAEAGISARGDLNPAANGTYEFPGGQGHVNHGALDYKGTNVELMKKLQFYAQQGPT-WGK-----VPSFKHSE-FD      |     |     |     |     |     |     |     |     |     |     |     |     |     |  |
| DIC-Q8MN53 | NPRANIFRRDH SKLETLDMMNIIDYNQYKTDPF SMG-----Y---PGNSINARFDIKGGS LPS-GNPIYSWFYHGTHGGIDGKAINYDMVNSFTAVARNGPTVTSO-----CPPFNWND-W       |     |     |     |     |     |     |     |     |     |     |     |     |     |  |
| Consensus  | .pra.i%.Rdhg...d\$......i.Yn#.d.fs.....a..pp.....l.p.g....p.....hg.ldvk....d.....a..gpt..d.....ppFkUse.sp                          |     |     |     |     |     |     |     |     |     |     |     |     |     |  |
|            | 651                                                                                                                                | 660 | 670 | 679 |     |     |     |     |     |     |     |     |     |     |  |
| DRO-Q94898 | VEEGGGHEGHPDEWFDKYSPKWAH                                                                                                           |     |     |     |     |     |     |     |     |     |     |     |     |     |  |
| MUS-Q8BHG8 | FHSML-HMGQPDLMFSPIRVPWD                                                                                                            |     |     |     |     |     |     |     |     |     |     |     |     |     |  |
| HOM-Q8NHP8 | FSGLL-HMGQPDLMKFAPVKYSWD                                                                                                           |     |     |     |     |     |     |     |     |     |     |     |     |     |  |
| CEL-062146 | FKDKVNHVGHPEWKFNTLVHKWETEINA                                                                                                       |     |     |     |     |     |     |     |     |     |     |     |     |     |  |
| DIC-Q8MN53 | --SLISHQYMPQIYNFTWISINI                                                                                                            |     |     |     |     |     |     |     |     |     |     |     |     |     |  |
| Consensus  | .....H.ghP#ewnF...s.kw.....                                                                                                        |     |     |     |     |     |     |     |     |     |     |     |     |     |  |
