# Supplementary material for: Regulation of cellular plasticity in Drosophila imaginal disc cells by the Polycomb group, trithorax group and lama genes
Source: Oxford University Press journal article supplement (doi:10.1242/dev.01927), 2005-08-02
Supplement: dev01927supptable_7.pdf [file dev01927supptable_7.pdf]

**Table S7 Genes upregulated in TD cells**

|                                        | TD vs. D(wg)/V(wg) | CG Number      | Function                                                                          |
|----------------------------------------|--------------------|----------------|-----------------------------------------------------------------------------------|
| 069_1 <sup>st</sup> leg vs. reference  |                    | <b>CG14567</b> | /                                                                                 |
| 131_1 <sup>st</sup> leg vs. reference  |                    | <b>CG10287</b> | Gasp; chitin binding                                                              |
| 085_1 <sup>st</sup> leg vs. reference  |                    | <b>CG9777</b>  | /                                                                                 |
| AK93_1 <sup>st</sup> leg vs. reference |                    | <b>CG17108</b> | acetyl-CoA carboxylase activity                                                   |
| 251_wing vs. leg                       |                    | <b>CG11073</b> | /                                                                                 |
| 256_wing vs. leg                       |                    | <b>CG11527</b> | Tig; binding; extracellular matrix                                                |
| 059_wing vs. leg                       |                    | <b>CG12840</b> | Tsp42E1; receptor signaling protein activity                                      |
| 249_wing vs. leg                       |                    | <b>CG1572</b>  | /                                                                                 |
| 255_wing vs. leg                       |                    | <b>CG10527</b> | farnesoic acid O-methyltransferase activity                                       |
| 062_wing vs. leg                       |                    | <b>CG10119</b> | LamC; structural constituent of cytoskeleton                                      |
| 248_wing vs. leg                       |                    | <b>CG15611</b> | CG15611                                                                           |
| 254_wing vs. leg                       |                    | <b>CG5393</b>  | apt; RNA binding; RNA polymerase II transcription factor activity                 |
| 064_wing vs. leg                       |                    | <b>CG6868</b>  | td; procollagen C-endopeptidase activity; metalloendopeptidase activity           |
| 069_leg(wg+) vs. reference             |                    | <b>CG9192</b>  | /                                                                                 |
| 067_leg(wg+) vs. reference             |                    | <b>CG10697</b> | Ddc; aromatic-L-amino-acid decarboxylase activity                                 |
| 159_leg(wg+) vs. reference             |                    | <b>CG4319</b>  | rpr; apoptosis                                                                    |
| 049_leg(wg+) vs. reference             |                    | <b>CG15047</b> | /                                                                                 |
| 065_leg(wg+) vs. reference             |                    | <b>CG3199</b>  | /                                                                                 |
| 078_leg(wg+) vs. reference             |                    | <b>CG6023</b>  | /                                                                                 |
| 041_TD vs. D(wg)                       |                    | <b>CG1449</b>  | zfh2; DNA binding; RNA binding; RNA polymerase II transcription factor activity   |
| 210_TD vs. D(wg)                       |                    | <b>CG10645</b> | lama                                                                              |
| 047_TD vs. D(wg)                       |                    | <b>CG13024</b> | /                                                                                 |
| 044_TD vs. V(wg)                       |                    | <b>CG3598</b>  | /                                                                                 |
| 204_TD vs. V(wg)                       |                    | <b>CG12288</b> | RNA binding; poly(A) binding                                                      |
| 035_TD vs. V(wg)                       |                    | <b>CG11555</b> | /                                                                                 |
| 050_TD vs. V(wg)                       |                    | <b>CG4806</b>  | RNA bindin                                                                        |
| 226_TD vs. V(wg)                       |                    | <b>CG17903</b> | Cyt-c-p; electron transporter activity; oxidoreductase activity                   |
| 046_D(wg) vs. V(wg)                    |                    | <b>CG10337</b> | /                                                                                 |
| 048_D(wg) vs. V(wg)                    |                    | <b>CG17914</b> | yellow-b                                                                          |
| 218_D(wg) vs. V(wg)                    |                    | <b>CG13692</b> | GTP binding; ARF GTPase activator activity                                        |
| 017_TD vs. D(wt)                       |                    | <b>CG15279</b> | cation:amino acid symporter activity; neurotransmitter:sodium symporter activity  |
| 008_TD vs. D(wt)                       |                    | <b>CG15484</b> | /                                                                                 |
| 018_D(wt) vs. V(wt)                    |                    | <b>CG15629</b> | oxidoreductase activity                                                           |
| 020_D(wt) vs. V(wt)                    |                    | <b>CG14879</b> | /                                                                                 |
| 059_D(Lwt) vs. V(wt)                   |                    | <b>CG14059</b> | /                                                                                 |
|                                        |                    | <b>CG11822</b> | nAcRbeta-21C; nicotinic acetylcholine-activated cation-selective channel activity |
|                                        |                    | <b>CG3686</b>  | aromatic-L-amino acid decarboxylase                                               |
|                                        |                    | <b>CG5840</b>  | pyrroline-5-carboxylate reductase activity                                        |

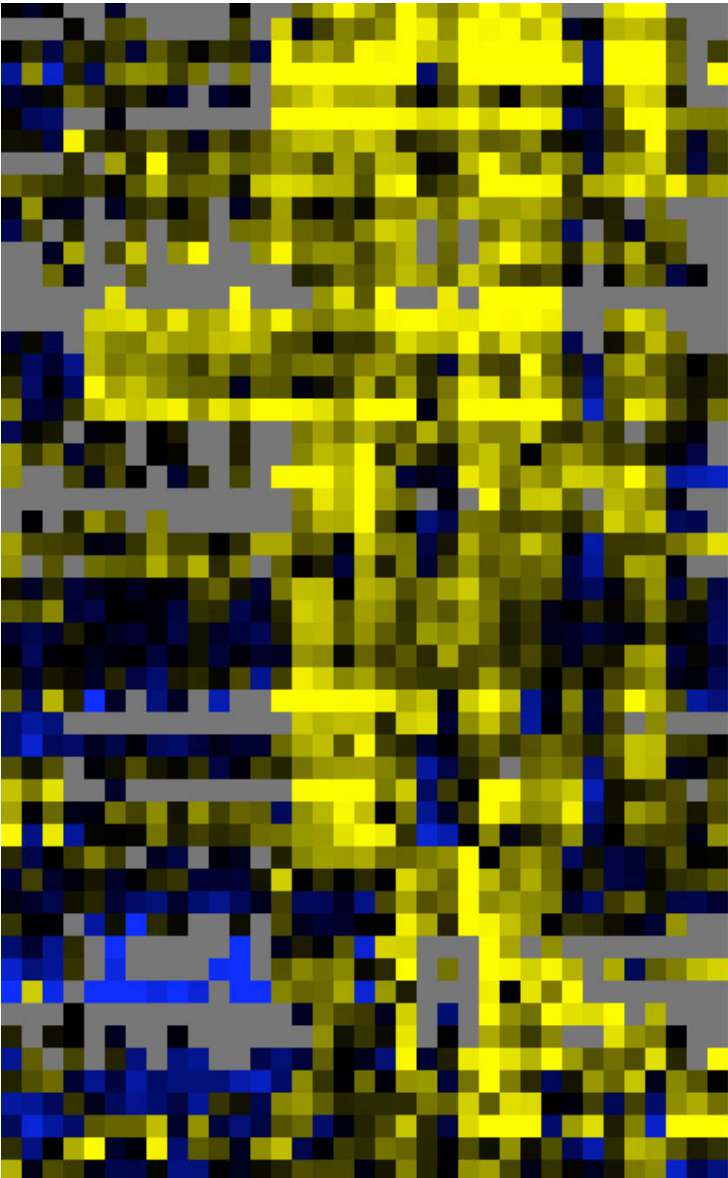

|                |                                                                                             |
|----------------|---------------------------------------------------------------------------------------------|
| <b>CG4859</b>  | Mmp1; metalloendopeptidase activity; structural molecule activity                           |
| <b>CG5993</b>  | os; receptor binding; morphogen activity; cytokine activity                                 |
| <b>CG6816</b>  | Cyp18a1; electron transporter activity; oxidoreductase activity                             |
| <b>CG5831</b>  | ATP-dependent RNA helicase activity                                                         |
| <b>CG7722</b>  | serine-type endopeptidase inhibitor activity                                                |
| <b>CG18355</b> | Btk29A; non-membrane spanning protein tyrosine kinase activity                              |
| <b>CG3691</b>  | Pof; RNA binding                                                                            |
| <b>CG3359</b>  | mfas; axonogenesis; cell-cell adhesion; ectoderm development; signal transduction           |
| <b>CG17124</b> | protein phosphatase inhibitor activity                                                      |
| <b>CG13780</b> | Pvf2; vascular endothelial growth factor receptor binding                                   |
| <b>CG3200</b>  | Req-2; wide-spectrum protease inhibitor activity                                            |
| <b>CG13691</b> | /                                                                                           |
| <b>CG8394</b>  | gamma-aminobutyric acid transporter activity                                                |
| <b>CG8404</b>  | Sox15, ATP binding; tRNA ligase activity; transcription factor activity                     |
| <b>CG6044</b>  | /                                                                                           |
| <b>CG17941</b> | ds; signal transducer activity; receptor activity; cell adhesion molecule binding           |
| <b>CG6014</b>  | /                                                                                           |
| <b>CG5518</b>  | membrane alanyl aminopeptidase activity                                                     |
| <b>CG7059</b>  | phosphoglycerate mutase activity                                                            |
| <b>CG10863</b> | CG10863; aldehyde reductase activity                                                        |
| <b>CG14598</b> | /                                                                                           |
| <b>CG5272</b>  | gnu; molecular function unknown                                                             |
| <b>CG8515</b>  | CG8515; structural constituent of cuticle                                                   |
| <b>CG4807</b>  | ab; specific RNA polymerase II transcription factor activity                                |
| <b>CG7730</b>  | /                                                                                           |
| <b>CG11076</b> | /                                                                                           |
| <b>CG4904</b>  | Pros35; endopeptidase activity                                                              |
| <b>CG6009</b>  | P5cr; pyrroline-5-carboxylate reductase activity                                            |
| <b>CG7351</b>  | calcium-independent phospholipase A2 activity                                               |
| <b>CG3351</b>  | mRpL11; nucleic acid binding; structural constituent of ribosome                            |
| <b>CG7296</b>  | /                                                                                           |
| <b>CG8157</b>  | /                                                                                           |
| <b>CG5535</b>  | cationic amino acid transporter activity                                                    |
| <b>CG10444</b> | cation transporter activity; sodium-dependent multivitamin transporter activity             |
| <b>CG4482</b>  | mol; asymmetric protein localization                                                        |
| <b>CG7670</b>  | /                                                                                           |
| <b>CG5575</b>  | ken; nucleic acid binding; transcription factor activity; protein binding; zinc ion binding |
| <b>CG5326</b>  | acyltransferase activity                                                                    |
| <b>CG1210</b>  | Pk61C; receptor signaling protein serine/threonine kinase activity                          |
| <b>CG3036</b>  | sodium:phosphate symporter activity                                                         |
| <b>CG7367</b>  | triacylglycerol lipase activity                                                             |
| <b>CG1443</b>  | oxidoreductase activity                                                                     |
| <b>CG6906</b>  | carbonate dehydratase activity                                                              |
| <b>CG4501</b>  | bgm; long-chain-fatty-acid-CoA ligase activity                                              |
| <b>CG3331</b>  | e; beta-alanyl-dopamine synthase activity; ligase activity                                  |
| <b>CG5468</b>  | /                                                                                           |
| <b>CG8805</b>  | wun2; phosphatidate phosphatase activity                                                    |
| <b>CG7294</b>  | /                                                                                           |
| <b>CG8483</b>  | defense response                                                                            |
| <b>CG8827</b>  | Ance; zinc ion binding; peptidyl-dipeptidase activity                                       |
| <b>CG7850</b>  | puc; protein tyrosine phosphatase activity; MAP kinase p                                    |
| <b>CG15493</b> | /                                                                                           |

## II.

|  |                |                                                                                                 |
|--|----------------|-------------------------------------------------------------------------------------------------|
|  | <b>CG16753</b> | /                                                                                               |
|  | <b>CG10067</b> | Act57B; structural constituent of cytoskeleton; glucuronosyltransferase activity                |
|  | <b>CG4427</b>  | cabut; transcriptional activator activity                                                       |
|  | <b>CG17494</b> | /                                                                                               |
|  | <b>CG3198</b>  | nuclear mRNA splicing, via spliceosome                                                          |
|  | <b>CG15561</b> | /                                                                                               |
|  | <b>CG12358</b> | Paip2; protein binding                                                                          |
|  | <b>CG12534</b> | flavin-linked sulfhydryl oxidase activity                                                       |
|  | <b>CG18535</b> | /                                                                                               |
|  | <b>CG5874</b>  | RNA binding                                                                                     |
|  | <b>CG1898</b>  | HBS1; translation release factor activity; translation elongation factor activity               |
|  | <b>CG12581</b> | /                                                                                               |
|  | <b>CG6116</b>  | molecular function unknown                                                                      |
|  | <b>CG3039</b>  | ogre; gap-junction forming channel activity                                                     |
|  | <b>CG11525</b> | CycG; cyclin-dependent protein kinase regulator activity                                        |
|  | <b>CG2093</b>  | /                                                                                               |
|  | <b>CG1091</b>  | /                                                                                               |
|  | <b>CG13097</b> | RNA binding; nucleic acid binding                                                               |
|  | <b>CG14479</b> | /                                                                                               |
|  | <b>CG3983</b>  | receptor binding; hormone activity                                                              |
|  | <b>CG10161</b> | eIF-3p66; translation initiation factor activity; GO:0003743; ; GO:0003743; ; GO:0003743        |
|  | <b>CG11990</b> | /                                                                                               |
|  | <b>CG14804</b> | intracellular protein transport; lysosome organization and biogenesis                           |
|  | <b>CG11259</b> | MICAL-like; actin binding; structural constituent of cytoskeleton                               |
|  | <b>CG4006</b>  | Akt1; receptor signaling protein serine/threonine kinase activity                               |
|  | <b>CG5353</b>  | threonine--tRNA ligase                                                                          |
|  | <b>CG5836</b>  | SF1; pre-mRNA splicing factor activity; transcription cofactor activity                         |
|  | <b>CG4602</b>  | Srp54; RNA binding; pre-mRNA splicing factor activity                                           |
|  | <b>CG7564</b>  | nuclear mRNA splicing, via spliceosome                                                          |
|  | <b>CG7788</b>  | Ice; caspase activity                                                                           |
|  | <b>CG6962</b>  | /                                                                                               |
|  | <b>CG5355</b>  | proyl oli; GOpeptidase activity                                                                 |
|  | <b>CG16750</b> | protein binding; receptor binding; perception of sound                                          |
|  | <b>CG4994</b>  | Mpcp; carrier activity; phosphate transporter activity                                          |
|  | <b>CG9277</b>  | betaTub56D; GTP binding; structural constituent of cytoskeleton                                 |
|  | <b>CG6767</b>  | nucleotide kinase activity; ribose-phosphate diphosphokinase activity                           |
|  | <b>CG9915</b>  | /                                                                                               |
|  | <b>CG17187</b> | /                                                                                               |
|  | <b>CG3183</b>  | geminin; DNA binding, regulation of cell cycle                                                  |
|  | <b>CG4528</b>  | snf; RNA binding; pre-mRNA splicing factor activity                                             |
|  | <b>CG2028</b>  | CkIalpha; casein kinase I activity; receptor signaling protein serine/threonine kinase activity |
|  | <b>CG5014</b>  | Vap-33-1; intracellular protein transport; synaptic transmission                                |
|  | <b>CG7583</b>  | CtBP; protein C-terminus binding; transcription corepressor activity                            |
|  | <b>CG5605</b>  | eRF1; translation termination factor activity; translation release factor activity              |
|  | <b>CG4863</b>  | Rpl3; nucleic acid binding; structural constituent of ribosome                                  |
|  | <b>CG5130</b>  | zinc ion transporter activity                                                                   |

### III.

|                                                                                   |                                                                                                                            |
|-----------------------------------------------------------------------------------|----------------------------------------------------------------------------------------------------------------------------|
| 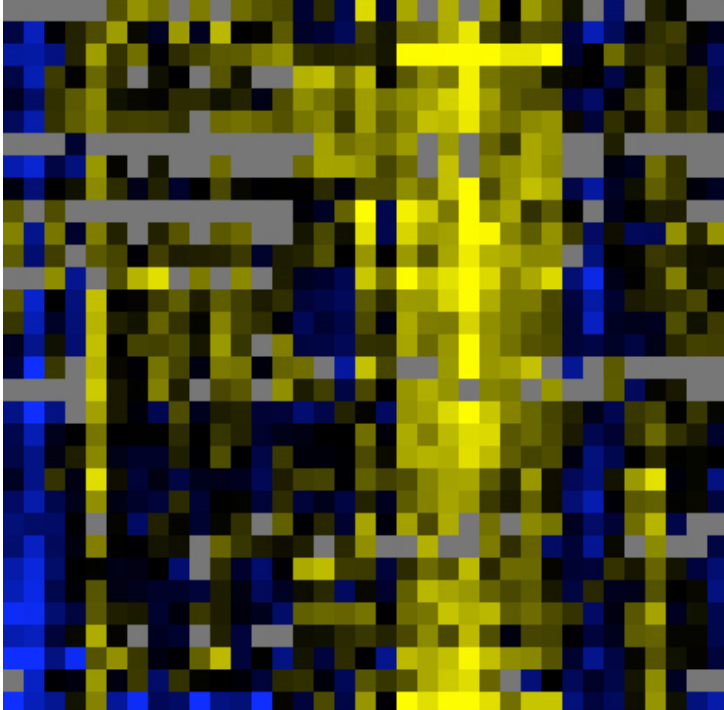 | <b>CG11450</b> net; RNA polymerase II transcription factor activity                                                        |
|                                                                                   | <b>CG2982</b> /                                                                                                            |
|                                                                                   | <b>CG2198</b> Ama; antigen binding                                                                                         |
|                                                                                   | <b>CG12018</b> nucleic acid binding; delta DNA polymerase activity                                                         |
|                                                                                   | <b>CG2863</b> Nle; Notch signaling pathway                                                                                 |
|                                                                                   | <b>CG3568</b> /                                                                                                            |
|                                                                                   | <b>CG13813</b> /                                                                                                           |
|                                                                                   | <b>CG5913</b> /                                                                                                            |
|                                                                                   | <b>CG17337</b> /                                                                                                           |
|                                                                                   | <b>CG18410</b> /                                                                                                           |
|                                                                                   | <b>CG17843</b> flavin-linked sulfhydryl oxidase activity; glucosidase activity                                             |
|                                                                                   | <b>CG7108</b> DNApol-alpha50; nucleic acid binding; primase activity; alpha DNA polymerase activity                        |
|                                                                                   | <b>CG10121</b> SP1173                                                                                                      |
|                                                                                   | <b>CG4978</b> Mcm7; chromatin binding; DNA replication origin binding; DNA helicase activity                               |
|                                                                                   | <b>CG5371</b> RnrL; ribonucleoside-diphosphate reductase activity                                                          |
|                                                                                   | <b>CG8171</b> dup; DNA binding, DNA replication checkpoint                                                                 |
|                                                                                   | <b>CG7628</b> phosphate transporter activity                                                                               |
|                                                                                   | <b>CG6897</b> /                                                                                                            |
|                                                                                   | <b>CG13849</b> Nop56; RNA binding                                                                                          |
|                                                                                   | <b>CG6375</b> pit; nucleic acid binding; RNA helicase activity; ATP-dependent RNA helicase activity                        |
|                                                                                   | <b>CG7182</b> defense response; protein folding; response to heat; response to stress                                      |
|                                                                                   | <b>CG13425</b> bl; RNA binding; transcription factor binding, appendage morphogenesis; cell fate commitment; proliferation |
|                                                                                   | <b>CG7878</b> nucleic acid binding; helicase activity; ATP-dependent RNA helicase activity                                 |
|                                                                                   | <b>CG11803</b> ATP binding; ATPase activity, coupled to transmembrane movement of substances; transporter activity         |
|                                                                                   | <b>CG9253</b> nucleic acid binding; ATP-dependent RNA helicase activity                                                    |
|                                                                                   | <b>CG10778</b> acyltransferase activity; transferase activity                                                              |
|                                                                                   | <b>CG5383</b> PSR                                                                                                          |
|                                                                                   | <b>CG18600</b> /                                                                                                           |
|                                                                                   | <b>CG9983</b> Hrb98DE; RNA binding                                                                                         |
|                                                                                   | <b>CG6724</b> /                                                                                                            |
|                                                                                   | <b>CG3593</b> r-l; orotate phosphoribosyltransferase activity; orotidine-5'-phosphate decarboxylase activity               |
|                                                                                   | <b>CG7447</b> /                                                                                                            |

### IV.

|                                                                                     |                                                                                                                            |
|-------------------------------------------------------------------------------------|----------------------------------------------------------------------------------------------------------------------------|
| 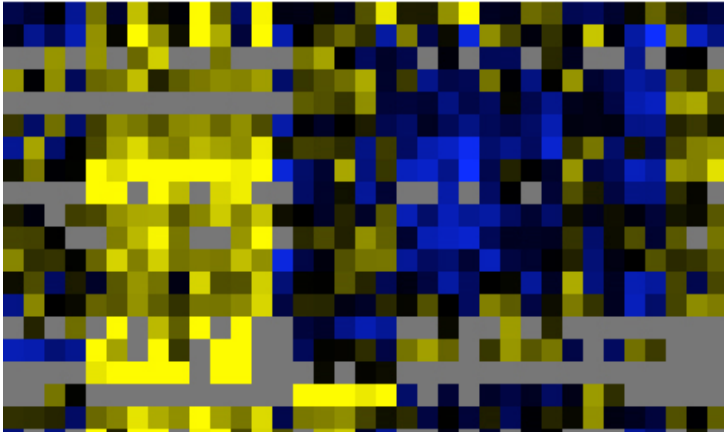 | <b>CG1910</b> molecular function unknown                                                                                   |
|                                                                                     | <b>CG15353</b> /                                                                                                           |
|                                                                                     | <b>CG14489</b> olf186-M                                                                                                    |
|                                                                                     | <b>CG15093</b> 3-hydroxyisobutyrate dehydrogenase activity                                                                 |
|                                                                                     | <b>CG14846</b> /                                                                                                           |
|                                                                                     | <b>CG17032</b> /                                                                                                           |
|                                                                                     | <b>CG12023</b> /                                                                                                           |
|                                                                                     | <b>CG12287</b> pdm2; DNA binding; specific RNA polymerase II transcription factor activity, :CG15487:CG15486               |
|                                                                                     | <b>CG7924</b> /                                                                                                            |
|                                                                                     | <b>CG2762</b> ush; transcription factor binding; ligand-dependent nuclear receptor activity; transcription factor activity |
|                                                                                     | <b>CG3385</b> nvy; transcription factor activity                                                                           |
|                                                                                     | <b>CG9552</b> rost; mesoderm development; myoblast fusion                                                                  |
|                                                                                     | <b>CG2444</b> /                                                                                                            |
|                                                                                     | <b>CG7860</b> asparaginase activity                                                                                        |
|                                                                                     | <b>CG17738</b> /                                                                                                           |
|                                                                                     | <b>CG17345</b> amd; carboxy-lyase activity; aromatic-L-amino-acid decarboxylase activity                                   |
|                                                                                     | <b>CG12843</b> Tsp42Ei; Tetraspanin                                                                                        |
|                                                                                     | <b>CG13250</b> /                                                                                                           |
|                                                                                     | <b>CG9812</b> /                                                                                                            |

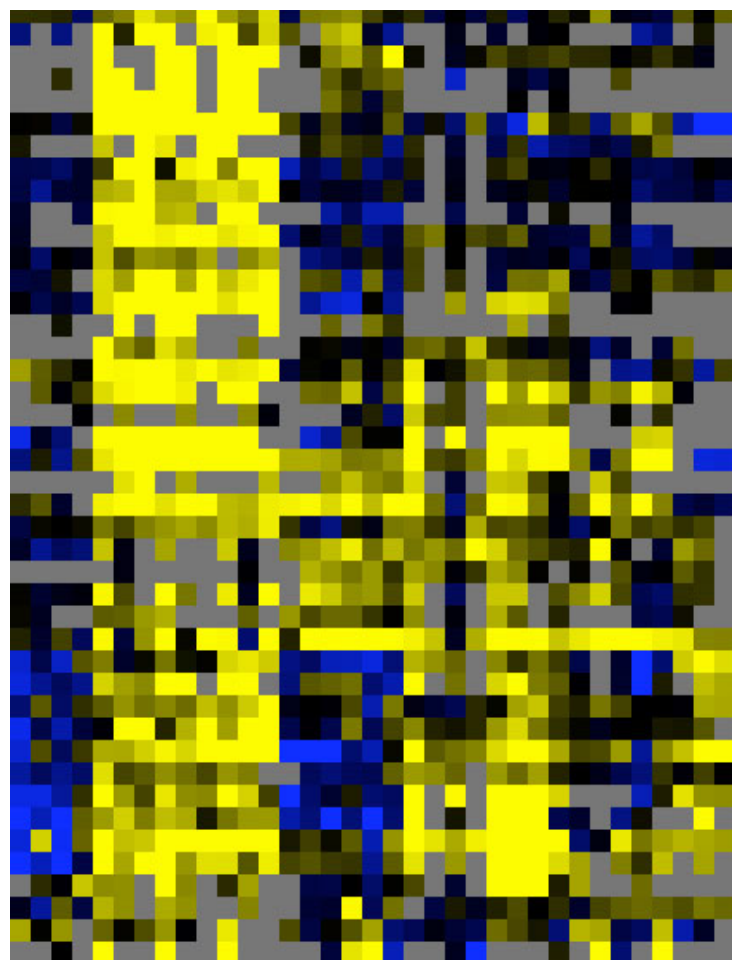

|                |                                                                                                         |
|----------------|---------------------------------------------------------------------------------------------------------|
| <b>CG2663</b>  | carrier activity; tocopherol binding                                                                    |
| <b>CG10197</b> | kn; collier; transcription regulator activity; specific RNA polymerase II transcription factor activity |
| <b>CG10619</b> | tup; specific RNA polymerase II transcription factor activity                                           |
| <b>CG5966</b>  | triacylglycerol lipase activity                                                                         |
| <b>CG8376</b>  | ap; zinc ion binding; specific RNA polymerase II transcription factor activity                          |
| <b>CG1148</b>  | Osi2; transcription regulator activity                                                                  |
| <b>CG1803</b>  | regucalcin; anterior/posterior axis specification; calcium-mediated signaling                           |
| <b>CG10704</b> | toe; transcription factor activity                                                                      |
| <b>CG3132</b>  | Ect3; beta-galactosidase activity                                                                       |
| <b>CG9427</b>  | /                                                                                                       |
| <b>CG7820</b>  | CAH1; carbonate dehydratase activity                                                                    |
| <b>CG1058</b>  | rpk; sodium channel activity; amiloride-sensitive sodium channel activity                               |
| <b>CG9023</b>  | Drip; water transporter activity; carrier activity                                                      |
| <b>CG10601</b> | mirr; protein binding; transcription factor activity                                                    |
| <b>CG6680</b>  | serine-type endopeptidase inhibitor activity                                                            |
| <b>CG9623</b>  | if; protein binding; receptor activity; cell adhesion molecule binding                                  |
| <b>CG10570</b> | /                                                                                                       |
| <b>CG3254</b>  | pgant2; polypeptide N-acetylgalactosaminyltransferase activity                                          |
| <b>CG3830</b>  | vg; wing margin morphogenesis; wing morphogenesis                                                       |
| <b>CG1897</b>  | msh/ specific RNA polymerase II transcription factor activity                                           |
| <b>CG8216</b>  | /                                                                                                       |
| <b>CG9358</b>  | Phk-3; diacylglycerol binding; protein serine/threonine kinase activity; carrier activity               |
| <b>CG18589</b> | TepII; wide-spectrum protease inhibitor activity                                                        |
| <b>CG11370</b> | /                                                                                                       |
| <b>CG10208</b> | /                                                                                                       |
| <b>CG5397</b>  | sterol O-acyltransferase activity; hydrolase activity, acting on ester bonds                            |
| <b>CG9372</b>  | trypsin activity; serine-type peptidase activity                                                        |
| <b>CG7539</b>  | Edg91; structural constituent of pupal cuticle                                                          |
| <b>CG10625</b> | /                                                                                                       |
| <b>CG1698</b>  | potassium:amino acid transporter activity; cation transporter activity                                  |
| <b>CG11905</b> | /                                                                                                       |
| <b>CG8501</b>  | /                                                                                                       |
| <b>CG4766</b>  | /                                                                                                       |
| <b>CG1794</b>  | Mmp2; metalloendopeptidase activity; structural molecule activity                                       |
| <b>CG4746</b>  | mab-2; encodes Mab-21, involved in cell fate determination                                              |
| <b>CG8502</b>  | structural constituent of larval cuticle                                                                |
| <b>CG4914</b>  | SP39; trypsin activity; serine-type endopeptidase activity                                              |
| <b>CG9307</b>  | chitinase activity; hydrolase activity, hydrolyzing N-glycosyl compounds                                |
| <b>CG7811</b>  | b; aspartate 1-decarboxylase activity; glutamate decarboxylase activity                                 |
| <b>CG8587</b>  | Cyp301a1; electron transporter activity; oxidoreductase activity                                        |
| <b>CG16884</b> | /                                                                                                       |
| <b>CG8012</b>  | /                                                                                                       |
