# Supplementary material for: Regulation of cellular plasticity in Drosophila imaginal disc cells by the Polycomb group, trithorax group and lama genes
Source: Oxford University Press journal article supplement (doi:10.1242/dev.01927), 2005-08-02
Supplement: dev01927supptable_8.pdf [file dev01927supptable_8.pdf]

**Table S8 Genes downregulated in TD cells**

TD vs. D(wg)/V(wg)

069\_1<sup>st</sup>\_leg vs. reference  
 131\_1<sup>st</sup>\_leg vs. reference  
 085\_1<sup>st</sup>\_leg vs. reference  
 AK93\_1<sup>st</sup>\_leg vs. reference  
 251\_wing vs. leg  
 256\_wing vs. leg  
 059\_wing vs. leg  
 249\_wing vs. leg  
 255\_wing vs. leg  
 062\_wing vs. leg  
 248\_wing vs. leg  
 254\_wing vs. leg  
 064\_wing vs. leg  
 069\_leg(wg+) vs. reference  
 067\_leg(wg+) vs. reference  
 159\_leg(wg+) vs. reference  
 049\_leg(wg+) vs. reference  
 065\_leg(wg+) vs. reference  
 078\_leg(wg+) vs. reference  
 041\_TD vs. D(wg)  
 210\_TD vs. D(wg)  
 047\_TD vs. D(wg)  
 044\_TD vs. V(wg)  
 204\_TD vs. V(wg)  
 035\_TD vs. V(wg)  
 050\_TD vs. V(wg)  
 226\_TD vs. V(wg)  
 046\_D(wg) vs. V(wg)  
 048\_D(wg) vs. V(wg)  
 218\_D(wg) vs. V(wg)  
 017\_TD vs. D(wt)  
 008\_TD vs. D(wt)  
 018\_D(wt) vs. V(wt)  
 020\_D(wt) vs. V(wt)  
 059\_D(wt) vs. V(wt)

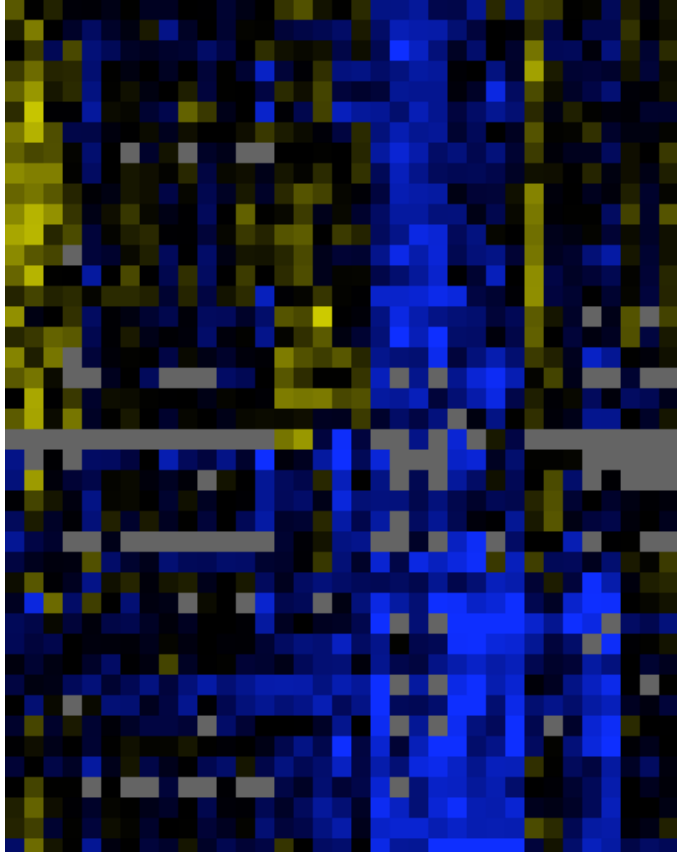

| CG Number | Function                                                                                                |
|-----------|---------------------------------------------------------------------------------------------------------|
| <b>V.</b> |                                                                                                         |
| CG10236   | LanA; structural molecule activity                                                                      |
| CG12070   | Sap-r; lipid metabolism; lipid transport; transport                                                     |
| CG4722    | bib; carrier activity; binding; water channel activity                                                  |
| CG10460   | cer; cysteine protease inhibitor activity                                                               |
| CG3379    | His4r; DNA binding                                                                                      |
| CG6770    | CG6770                                                                                                  |
| CG1775    | Med; DNA binding; RNA polymerase II transcription factor activity                                       |
| CG11739   | CG11739; tricarboxylate carrier activity                                                                |
| CG5009    | CG5009; palmitoyl-CoA oxidase activity                                                                  |
| CG10366   | CG10366; transcription regulator activity                                                               |
| CG10800   | Rca1; eye-antennal disc metamorphosis; regulation of mitosis; structural constituent of cytoskeleton    |
| CG6975    | gig; small GTPase regulatory/interacting protein activity; kinase binding                               |
| CG8251    | Pgi; phosphogluconate dehydrogenase (decarboxylating) activity; glucose-6-phosphate isomerase activity  |
| CG5189    | CG5189                                                                                                  |
| CG17323   | CG17323; glucuronosyltransferase activity                                                               |
| CG2060    | Cyp4e2; electron transporter activity; oxidoreductase activity                                          |
| CG8694    | LvpD; alpha-glucosidase activity                                                                        |
| CG1827    | CG1827; N4-(beta-N-acetylglucosaminy)-L-asparaginase activity                                           |
| CG30195   | CG30195 = new ID in v4, CG13513; CG30195                                                                |
| CG8788    | /                                                                                                       |
| CG7834    | CG7834; electron carrier activity; oxidoreductase activity                                              |
| CG10717   | ImpL1                                                                                                   |
| CG4432    | PGRP-LC; peptidoglycan receptor activity;; pattern recognition receptor activity; peptidoglycan binding |
| CG14855   | CG14855; organic cation porter activity; GO:0008513; carbohydrate transporter activity                  |
| CG2852    | CG2852; peptidyl-prolyl cis-trans isomerase activity                                                    |
| CG6287    | CG6287; phosphoglycerate dehydrogenase activity                                                         |
| CG14904   | Scp2; calcium ion binding; GTPase activity                                                              |
| CG5799    | dve; AT DNA binding; transcription factor activity                                                      |
| CG17919   | CG17919; kinase inhibitor activity; phosphatidylethanolamine binding                                    |
| CG12268   | CG12268; oxidoreductase activity                                                                        |
| CG15786   | CG15786                                                                                                 |
| CG11143   | Inos; inositol-3-phosphate synthase activity; phosphorus-oxygen lyase activity                          |
| CG5165    | Pgm; phosphoglucomutase activity;                                                                       |
| CG3649    | CG3649; high affinity inorganic phosphate:sodium symporter activity                                     |
| CG3837    | CG3837; insulin-like growth factor receptor activity                                                    |
| CG11550   | CG11550                                                                                                 |
| CG11899   | CG11899; phosphoserine transaminase activity                                                            |
| CG2171    | Tpi; triose-phosphate isomerase activity; intramolecular transferase activity                           |
| CG15630   | CG15630; CG15630                                                                                        |
| CG31075   | CG31075 = new ID in v4, CG6309; CG31075, aldehyde dehydrogenase (NAD) activity                          |
| CG6058    | Ald; fructose-bisphosphate aldolase activity                                                            |

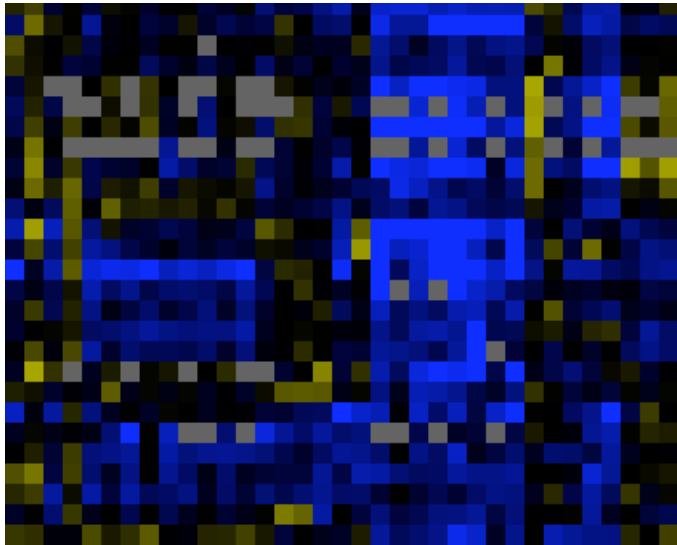

|                |                                                                                                               |
|----------------|---------------------------------------------------------------------------------------------------------------|
| <b>CG9914</b>  | CG9914: structural molecule activity; ; GO:0005198; oxidoreductase activity                                   |
| <b>CG5390</b>  | CG5390: NOT serine-type endopeptidase activity                                                                |
| <b>CG9027</b>  | CG9027: superoxide dismutase activity                                                                         |
| <b>CG10663</b> | CG10663: trypsin activity; serine-type endopeptidase activity                                                 |
| <b>CG3743</b>  | MTF-1: transcription factor activity; specific RNA polymerase II transcription factor activity                |
| <b>CG17052</b> | CG17052: structural constituent of peritrophic membrane (sensu Insecta);                                      |
| <b>CG15676</b> | CG15676: chaperone binding                                                                                    |
| <b>CG9656</b>  | qrn: RNA polymerase II transcription factor activity; general RNA polymerase II transcription factor activity |
| <b>CG5273</b>  | CG5273                                                                                                        |
| <b>CG6871</b>  | Cat: heme binding; antioxidant activity; catalase activity; peroxidase activity                               |
| <b>CG16733</b> | CG16733: aryl sulfotransferase activity; retinol dehydratase activity                                         |
| <b>CG6206</b>  | CG6206: hydrolase activity, hydrolyzing N-glycosyl compound; alpha-mannosidase activity                       |
| <b>CG2056</b>  | CG2056: trypsin activity; GO:0004295 ; EC: 3.4.21.4; serine-type endopeptidase activity                       |
| <b>CG7231</b>  | CG7231                                                                                                        |
| <b>CG7675</b>  | CG7675: oxidoreductase activity, acting on CH-OH group of donors                                              |
| <b>CG1916</b>  | Wnt2: receptor bindin; signal transducer activity                                                             |
| <b>CG9614</b>  | pip: heparin-sulfate 2-sulfotransferase activity; sulfotransferase activity                                   |
| <b>CG6117</b>  | Pka-C3: receptor signaling protein serine/threonine kinase activity; cAMP-dependent protein kinase activity   |
| <b>CG9355</b>  | dy: structural constituent of cuticle (sensu Insecta)                                                         |
| <b>CG4463</b>  | Hsp23: actin binding;                                                                                         |
| <b>CG32150</b> | CG32150 = new ID in v4, CG15714; CG32150                                                                      |
| <b>CG15085</b> | edl: protein binding; Ras signaling pathway;                                                                  |
| <b>CG8361</b>  | HLHm7: specific RNA polymerase II transcription factor activity; transcription factor activity                |
| <b>CG8365</b>  | E(spl): DNA binding; transcription factor activity                                                            |
| <b>CG6104</b>  | m2: Notch signaling pathway                                                                                   |
| <b>CG6127</b>  | Ser: receptor binding; Notch binding; signal transducer activity; epidermal growth factor receptor binding    |

## VI.

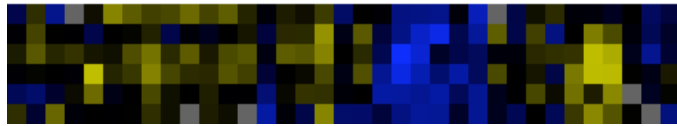

|                |                                                                                          |
|----------------|------------------------------------------------------------------------------------------|
| <b>CG4316</b>  | Sb: serine-type endopeptidase activity; trypsin activity                                 |
| <b>CG32940</b> | BcDNA: GH12504/ /                                                                        |
| <b>CG3376</b>  | CG3376: sphin; Gomyelin phosphodiesterase activity                                       |
| <b>CG3905</b>  | Su(z)2: DNA binding; transcription regulator activity                                    |
| <b>CG8681</b>  | clumsy: kainate selective glutamate receptor activity; ligand-gated ion channel activity |
| <b>CG5096</b>  | CG5096: receptor activity                                                                |
